# Supplementary material for: Molybdenum-mediated reductive deuteration of nitroarenes with D2O: synthesis of ortho- and para-deuterated anilines
Source: Royal Society of Chemistry journal article supplement (doi:10.1039/d4qo00956h), 2024-01-01
Supplement: d4qo00956h1.pdf [file d4qo00956h1.pdf]

## Supporting Information

### Molybdenum-Mediated Reductive Deuteration of Nitroarenes with D<sub>2</sub>O: Synthesis of *ortho*- and *para*- Deuterated Anilines

Jin-Liang Lu,<sup>†</sup> Jing-Tong Deng,<sup>†</sup> Ming Lang,<sup>\*,†</sup> and Jin-Bao Peng<sup>\*,†</sup>

<sup>†</sup>School of Pharmacy and Food Engineering, Wuyi University, Jiangmen, Guangdong 529020, P. R. China; orcid.org/0000-0002-0568-7740; E-mail: pengjb\_05@126.com

## Table of Contents

|                                                            |           |
|------------------------------------------------------------|-----------|
| <b>1.General Information .....</b>                         | <b>1</b>  |
| <b>2.General Procedure for the Starting Materials.....</b> | <b>2</b>  |
| <b>3.Optimization of Reaction Conditions .....</b>         | <b>2</b>  |
| <b>4.Spectroscopic Data of Products.....</b>               | <b>4</b>  |
| <b>5.Mechanistic Experiments.....</b>                      | <b>14</b> |
| <b>6.References.....</b>                                   | <b>15</b> |
| <b>7.Copies of NMR Spectra for Compounds.....</b>          | <b>16</b> |

## 1. General Information

### Reagents, solvents and analytical methods:

Unless otherwise noted, all reactions were carried out under a carbon monoxide or nitrogen atmosphere. All reagents were from commercial sources and used as received without further purification. All solvents were dried by standard techniques and distilled prior to use. Column chromatography was performed on silica gel (200-300 meshes) using petroleum ether (bp. 60~90 °C) and ethyl acetate as eluent. NMR spectra were recorded on a Bruker Avance operating at for  $^1\text{H}$  NMR at 500 MHz,  $^{13}\text{C}$  NMR at 126 MHz and  $^{19}\text{F}$  NMR at 471 MHz and spectral data were reported in ppm relative to tetramethylsilane (TMS) as internal standard and  $\text{CDCl}_3$  ( $^1\text{H}$  NMR  $\delta$  7.27,  $^{13}\text{C}$  NMR  $\delta$  77.0) as solvent. High-resolution mass spectra (HRMS) is produced by Thermo Fisher Scientific. Its main body is composed of two parts: Thermo Scientific's UltiMate 3000 Series liquid system and Thermo Scientific Q-Exactive combined quadrupole Orbitrap mass spectrometer. All coupling constants ( $J$ ) are reported in Hz. The following abbreviations were used to describe peak splitting patterns when appropriate: s = singlet, d = doublet, dd = double doublet, ddd = double doublet of doublets, t = triplet, dt = double triplet, q = quatriplet, m = multiplet, br = broad. NMR analyses of the unlabelled anilines and labelled anilines were recorded using the same deuterated solvent. After referencing the spectra to the residual solvent signal, integration of the signals on the unlabelled aniline spectra was performed. The same integration areas were applied to the deuterated product spectra, and calibration of the integration was carried out on the same signal. Deuterium content was calculated by the decrease of the area of a specific signal, using the following formula, where  $A_{\text{unlabelled}}$  is the area in the unlabelled aniline's spectra and  $A_{\text{labelled}}$  is the area in the product spectra:  $\text{D}\% = (1 - A_{\text{labelled}} / A_{\text{unlabelled}}) * 100\%$ .

## 2. General Procedure for the Starting Materials

### The Substrates of nitrocompounds (1a-1ad)

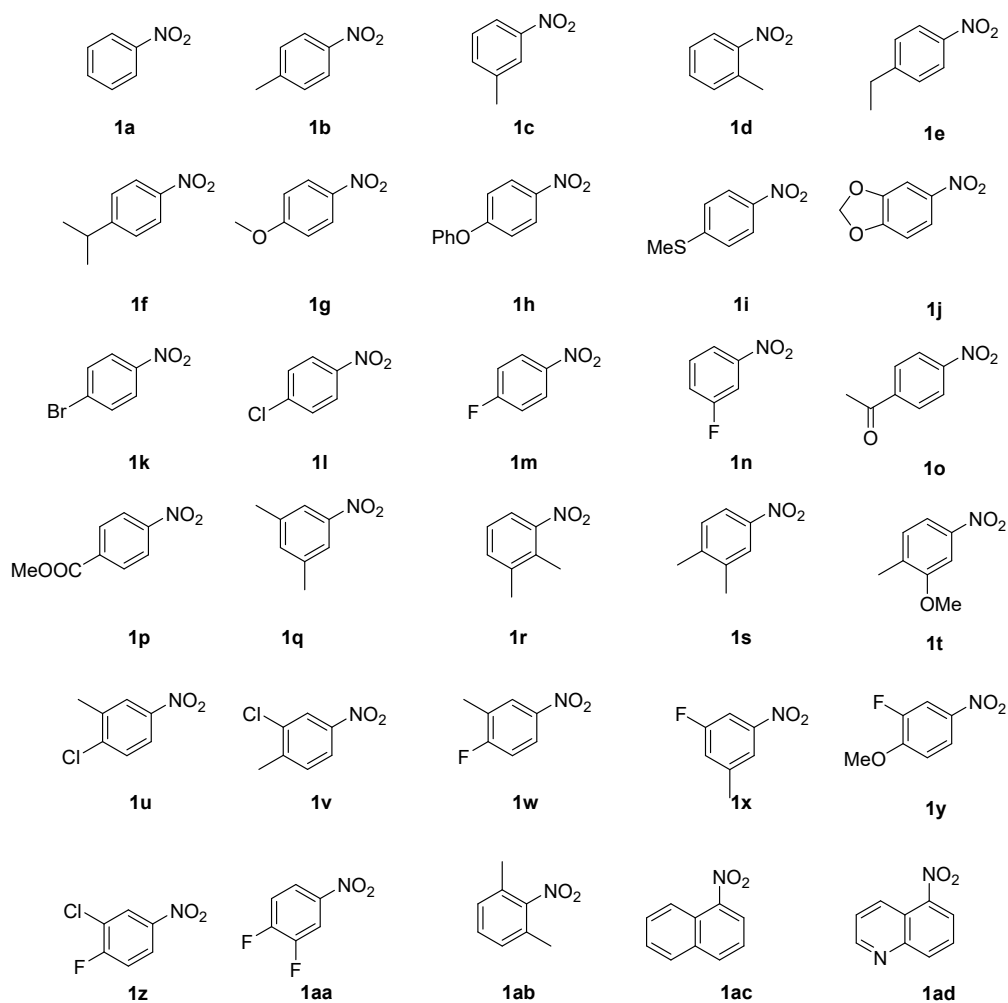

Figure S0 Substrates of nitrocompounds.

## 3. Optimization of Reaction Conditions

Table S1. Optimization of reaction time.<sup>[a]</sup>

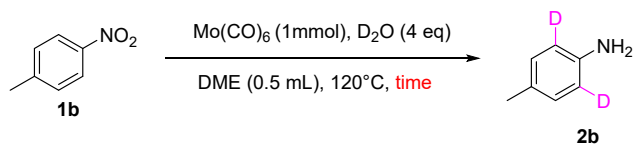

| Entry | Time | Yield (%) <sup>[b]</sup> | D%  |
|-------|------|--------------------------|-----|
| 1     | 1 h  | 37%                      | 47% |
| 2     | 2 h  | 53%                      | 66% |
| 3     | 4 h  | 71%                      | 66% |
| 4     | 8 h  | 87%                      | 69% |
| 5     | 12 h | 86%                      | 67% |

[a] Reaction conditions: **1b** (1 mmol), D<sub>2</sub>O (4 eq), Mo(CO)<sub>6</sub> (1 mmol), DME (0.5 mL), N<sub>2</sub> atmosphere, 120 °C for time. [b] Isolated yield.

Table S2. Optimization of temperature.<sup>[a]</sup>

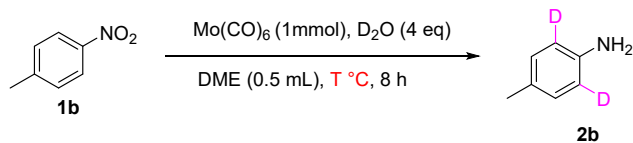

| Entry | Temperature | Yield (%) <sup>[b]</sup> | D%  |
|-------|-------------|--------------------------|-----|
| 1     | 60 °C       | trace                    |     |
| 2     | 80 °C       | trace                    |     |
| 3     | 100 °C      | 75%                      | 57% |
| 4     | 120 °C      | 87%                      | 69% |
| 5     | 130 °C      | 85%                      | 67% |

[a] Reaction conditions: **1b** (1 mmol), D<sub>2</sub>O (4 eq), Mo(CO)<sub>6</sub> (1 mmol), DME (0.5 mL), N<sub>2</sub> atmosphere, T °C for 8 h. [b] Isolated yield.

Table S3. Optimization of the amount of Mo(CO)<sub>6</sub>.<sup>[a]</sup>

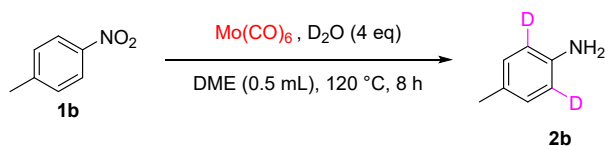

| Entry | Mo(CO) <sub>6</sub> | Yield (%) <sup>[b]</sup> | D%  |
|-------|---------------------|--------------------------|-----|
| 1     | 0.5 mmol            | 53%                      | 45% |
| 2     | 1 mmol              | 87%                      | 69% |
| 3     | 1.5 mmol            | 85%                      | 65% |

[a] Reaction conditions: **1b** (1 mmol), D<sub>2</sub>O (4 eq), Mo(CO)<sub>6</sub>, DME (0.5 mL), N<sub>2</sub> atmosphere, 120 °C for 8 h. [b] Isolated yield.

Table S4. Optimization of the equivalent of D<sub>2</sub>O.<sup>[a]</sup>

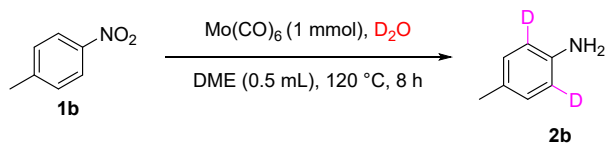

| Entry | D <sub>2</sub> O    | Yield (%) <sup>[b]</sup> | D%  |
|-------|---------------------|--------------------------|-----|
| 1     | NO D <sub>2</sub> O | NR                       |     |
| 2     | 1 equiv.            | 50%                      | 13% |
| 3     | 2 equiv.            | 65%                      | 55% |
| 4     | 3 equiv.            | 83%                      | 67% |
| 5     | 4 equiv.            | 87%                      | 69% |
| 6     | 5 equiv.            | 85%                      | 68% |

|   |           |     |     |
|---|-----------|-----|-----|
| 7 | 10 equiv. | 89% | 94% |
| 8 | 15 equiv. | 76% | 92% |
| 9 | 30 equiv. | NR  |     |

[a] Reaction conditions: **1b** (1 mmol), D<sub>2</sub>O, Mo(CO)<sub>6</sub> (1 mmol), DME (0.5 mL), N<sub>2</sub> atmosphere, 120 °C for 8 h. [b] Isolated yield.

Table S5. Optimization of solvent.<sup>[a]</sup>

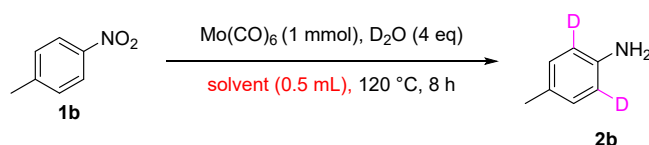

| Entry | Solvent          | Yield (%) <sup>[b]</sup> | D%  |
|-------|------------------|--------------------------|-----|
| 1     | 1,4-dioxane      | 62%                      | 60% |
| 2     | THF              | 63%                      | 92% |
| 3     | MeCN             | 69%                      | 39% |
| 4     | toluene          | 60%                      | 87% |
| 5     | DCE              | ND                       |     |
| 6     | MTBE             | 83%                      | 91% |
| 7     | DME              | 89%                      | 94% |
| 8     | CpME             | 50%                      | 90% |
| 9     | D <sub>2</sub> O | NR                       |     |

[a] Reaction conditions: **1b** (1 mmol), D<sub>2</sub>O (10 eq), Mo(CO)<sub>6</sub> (1 mmol), solvent (0.5 mL), N<sub>2</sub> atmosphere, 120 °C for 8 h. [b] Isolated yield.

## 4. Spectroscopic Data of Products

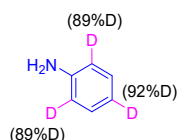

### Benzen-2,4,6-*d*<sub>3</sub>-amine (**2a**)

The title compound was prepared from Nitrobenzene (123.0 mg, 1 mmol). The crude residue was purified by flash chromatography (petroleum ether / ethyl acetate = 10:1, R<sub>f</sub> = 0.30) to give the product as a brown solid. (general procedure: 83.6 mg, 87%).

<sup>1</sup>H NMR (500 MHz, CDCl<sub>3</sub>) δ 7.17 (s, 2H), 6.77 (t, *J* = 7.4 Hz, 0.08H), 6.70 (d, *J* = 8.4 Hz, 0.23H), 3.31 (s, 2H).

<sup>13</sup>C NMR (126 MHz, CDCl<sub>3</sub>) δ 146.2, 129.2 (d, *J* = 13.9 Hz), 118.4 (dd, *J* = 41.6, 16.7 Hz), 115.0 (dd, *J* = 41.6, 17.9 Hz).

HRMS (ESI) *m/z*: [M+H]<sup>+</sup> Calcd for C<sub>6</sub>H<sub>5</sub>D<sub>3</sub>N<sup>+</sup> 97.0840; Found 97.0845.

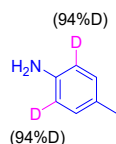

### 2,6-*d*<sub>2</sub>-*p*-Toluidine (2b)

The title compound was prepared from 1-Methyl-4-nitrobenzene (137.1 mg, 1 mmol). The crude residue was purified by flash chromatography (petroleum ether / ethyl acetate = 10:1, *R<sub>f</sub>* = 0.30) to give the product as a brown solid (general procedure: 97.1 mg, 89%).

**<sup>1</sup>H NMR (500 MHz, CDCl<sub>3</sub>)** δ 7.01 (s, 2H), 6.65 (d, *J* = 8.6 Hz, 0.11H), 3.46 (s, 2H), 2.29 (s, 3H).

**<sup>13</sup>C NMR (126 MHz, CDCl<sub>3</sub>)** δ 143.7, 129.7, 127.9, 116.2 – 113.8 (m), 20.5.

**HRMS (ESI) *m/z*:** [M+H]<sup>+</sup> Calcd for C<sub>7</sub>H<sub>8</sub>D<sub>2</sub>N<sup>+</sup> 110.0933; Found 110.0937.

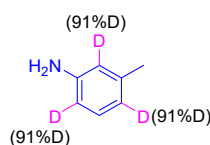

### 2,4,6-*d*<sub>3</sub>-*m*-Toluidine (2c)

The title compound was prepared from 1-Methyl-3-nitrobenzene (137.1 mg, 1 mmol). The crude residue was purified by flash chromatography (petroleum ether / ethyl acetate = 10:1, *R<sub>f</sub>* = 0.30) to give the product as a brown solid (general procedure: 91.3 mg, 83%).

**<sup>1</sup>H NMR (500 MHz, CDCl<sub>3</sub>)** δ 7.09 (s, 1H), 6.63 (d, *J* = 7.5 Hz, 0.09H), 6.57 – 6.52 (m, 0.17H), 3.44 (s, 2H), 2.31 (s, 3H).

**<sup>13</sup>C NMR (126 MHz, CDCl<sub>3</sub>)** δ 146.2, 139.0, 129.0, 119.3 (dd, *J* = 42.2, 18.1 Hz), 115.8 (dd, *J* = 42.6, 19.0 Hz), 112.1 (dd, *J* = 41.4, 17.3 Hz), 21.4.

**HRMS (ESI) *m/z*:** [M+H]<sup>+</sup> Calcd for C<sub>7</sub>H<sub>7</sub>D<sub>3</sub>N<sup>+</sup> 111.0996; Found 111.1000.

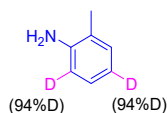

### 4,6-*d*<sub>2</sub>-*o*-Toluidine (2d)

The title compound was prepared from 1-Methyl-2-nitrobenzene (137.1 mg, 1 mmol). The crude residue was purified by flash chromatography (petroleum ether / ethyl acetate = 10:1, *R<sub>f</sub>* = 0.30) to give the product as a brown solid (general procedure: 97.1 mg, 89%).

**<sup>1</sup>H NMR (500 MHz, CDCl<sub>3</sub>)** δ 7.09 (d, *J* = 6.6 Hz, 2H), 6.76 (t, *J* = 7.4 Hz, 0.06H), 6.72 (d, *J* = 7.7 Hz, 0.06H), 3.44 (s, 2H), 2.21 (s, 3H).

**<sup>13</sup>C NMR (126 MHz, CDCl<sub>3</sub>)** δ 144.5, 130.4, 126.8, 122.4, 118.5 (dd, *J* = 41.9, 17.4 Hz), 114.8 (dd, *J* = 41.7, 18.1 Hz), 17.4.

**HRMS (ESI) *m/z*:** [M+H]<sup>+</sup> Calcd for C<sub>7</sub>H<sub>8</sub>D<sub>2</sub>N<sup>+</sup> 110.0933; Found 110.0938.

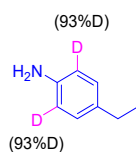

### 4-Ethylbenzen-2,6-*d*<sub>2</sub>-amine (2e)

The title compound was prepared from 1-Ethyl-4-nitrobenzene (151.1 mg, 0.9 mmol). The crude residue was purified by flash chromatography (petroleum ether / ethyl acetate = 10:1, R<sub>f</sub> = 0.30) to give the product as a brown solid (general procedure: 109.5 mg, 89%).

**<sup>1</sup>H NMR (500 MHz, CDCl<sub>3</sub>)** δ 7.03 (s, 2H), 6.67 (d, *J* = 8.6 Hz, 0.15H), 3.33 (s, 2H), 2.58 (q, *J* = 7.6 Hz, 2H), 1.23 (t, *J* = 7.6 Hz, 3H).

**<sup>13</sup>C NMR (126 MHz, CDCl<sub>3</sub>)** δ 143.9, 134.5, 128.5, 115.1 (dd, *J* = 41.1, 17.3 Hz), 28.0, 16.0.

**HRMS (ESI) m/z:** [M+H]<sup>+</sup> Calcd for C<sub>8</sub>H<sub>10</sub>D<sub>2</sub>N<sup>+</sup> 124.1090; Found 124.1091.

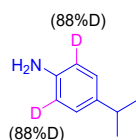

#### 4-Isopropylbenzen-2,6-*d*<sub>2</sub>-amine (2f)

The title compound was prepared from 1-Isopropyl-4-nitrobenzene (165.1 mg, 1 mmol). The crude residue was purified by flash chromatography (petroleum ether / ethyl acetate = 10:1, R<sub>f</sub> = 0.30) to give the product as a brown solid (general procedure: 121.9 mg, 89%).

**<sup>1</sup>H NMR (500 MHz, CDCl<sub>3</sub>)** δ 7.06 (s, 2H), 6.68 (d, *J* = 8.6 Hz, 0.24H), 3.26 (s, 2H), 2.90 – 2.78 (m, 1H), 1.24 (d, *J* = 6.9 Hz, 6H).

**<sup>13</sup>C NMR (126 MHz, CDCl<sub>3</sub>)** δ 144.0, 139.2, 127.0, 115.1 (dd, *J* = 41.3, 17.8 Hz), 33.3, 24.3.

**HRMS (ESI) m/z:** [M+H]<sup>+</sup> Calcd for C<sub>9</sub>H<sub>12</sub>D<sub>2</sub>N<sup>+</sup> 138.1246; Found 138.1247.

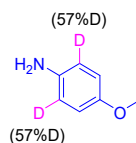

#### 4-Methoxybenzen-2,6-*d*<sub>2</sub>-amine (2g)

The title compound was prepared from 1-Methoxy-4-nitrobenzene (153.1mg, 1 mmol). The crude residue was purified by flash chromatography (petroleum ether / ethyl acetate = 10:1, R<sub>f</sub> = 0.20) to give the product as a brown solid (general procedure: 112.6 mg, 90%).

**<sup>1</sup>H NMR (500 MHz, CDCl<sub>3</sub>)** δ 6.77 (s, 2H), 6.68 (d, *J* = 12.3 Hz, 0.87H), 3.77 (s, 3H), 3.12 (s, 2H).

**<sup>13</sup>C NMR (126 MHz, CDCl<sub>3</sub>)** δ 152.9, 139.8, 116.5, 114.8 (dd, *J* = 12.2, 2.0 Hz), 55.8.

**HRMS (ESI) m/z:** [M+H]<sup>+</sup> Calcd for C<sub>7</sub>H<sub>8</sub>D<sub>2</sub>NO<sup>+</sup> 126.0882; Found 126.0885.

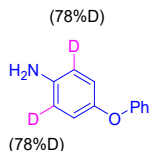

#### 4-Phenoxybenzen-2,6-*d*<sub>2</sub>-amine (2h)

The title compound was prepared from 1-Nitro-4-phenoxybenzene (215.1 mg, 1 mmol). The crude residue was purified by flash chromatography (petroleum ether / ethyl acetate = 10:1, R<sub>f</sub> = 0.20) to give the product as a yellow solid (general procedure: 162.7 mg, 87%).

**<sup>1</sup>H NMR (500 MHz, CDCl<sub>3</sub>)** δ 7.36 – 7.30 (m, 2H), 7.06 (t, *J* = 7.4 Hz, 1H), 6.99 (d, *J* = 7.7 Hz, 2H), 6.92 (s, 2H), 6.71 (d, *J* = 9.1 Hz, 0.44H), 3.51 (s, 2H).

**<sup>13</sup>C NMR (126 MHz, CDCl<sub>3</sub>)** δ 159.0, 148.6, 142.6, 129.6, 122.1, 121.1, 117.3, 116.1 (dd, *J* = 41.0, 16.9 Hz).

**HRMS (ESI) m/z:** [M+H]<sup>+</sup> Calcd for C<sub>12</sub>H<sub>10</sub>D<sub>2</sub>NO<sup>+</sup> 188.1039; Found 188.1040.

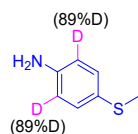

#### 4-(Methylthio)benzen-2,6-d<sub>2</sub>-amine (2i)

The title compound was prepared from Methyl(4-nitrophenyl)sulfane (169.2 mg, 1 mmol). The crude residue was purified by flash chromatography (petroleum ether / ethyl acetate = 10:1, R<sub>f</sub> = 0.20) to give the product as a yellow solid (general procedure: 108.6 mg, 77%).

**<sup>1</sup>H NMR (500 MHz, CDCl<sub>3</sub>)** δ 7.20 (s, 2H), 6.65 (d, *J* = 8.8 Hz, 0.22H), 3.51 (s, 2H), 2.44 (s, 3H).

**<sup>13</sup>C NMR (126 MHz, CDCl<sub>3</sub>)** δ 146.2, 138.9, 120.3 (dd, *J* = 43.5, 19.6 Hz), 112.9 (dd, *J* = 42.3, 18.8 Hz), 21.2.

**HRMS (ESI) m/z:** [M+H]<sup>+</sup> Calcd for C<sub>7</sub>H<sub>8</sub>D<sub>2</sub>NS<sup>+</sup> 142.0654; Found 142.0655.

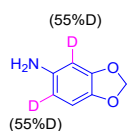

#### Benzo[d][1,3]dioxol-4,6-d<sub>2</sub>-5-amine (2j)

The title compound was prepared from 4-Nitrobenzo[d][1,3]dioxole (167.5 mg, 1.5 mmol). The crude residue was purified by flash chromatography (petroleum ether / ethyl acetate = 10:1, R<sub>f</sub> = 0.20) to give the product as a yellow solid (general procedure: 115.5 mg, 83%).

**<sup>1</sup>H NMR (500 MHz, CDCl<sub>3</sub>)** δ 6.62 (s, 1H), 6.30 (s, 0.9H), 5.86 (s, 2H).

**<sup>13</sup>C NMR (126 MHz, CDCl<sub>3</sub>)** δ 108.5 (d, *J* = 11.0 Hz), 100.7, 98.2

**HRMS (ESI) m/z:** [M+H]<sup>+</sup> Calcd for C<sub>7</sub>H<sub>6</sub>D<sub>2</sub>NO<sup>+</sup> 140.0675; Found 140.0684.

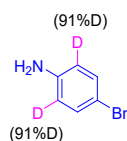

#### 4-Bromobenzen-2,6-d<sub>2</sub>-amine (2k)

The title compound was prepared from 1-Bromo-4-nitrobenzene (201.0 mg, 1 mmol). The crude residue was purified by flash chromatography (petroleum ether / ethyl acetate = 10:1, R<sub>f</sub> = 0.30) to give the product as a red solid (general procedure: 143.6 mg, 83%).

**<sup>1</sup>H NMR (500 MHz, CDCl<sub>3</sub>)** δ 7.26 (s, 2H), 6.57 (d, *J* = 9.1 Hz, 0.18H), 3.59 (s, 2H).

**<sup>13</sup>C NMR (126 MHz, CDCl<sub>3</sub>)** δ 145.4, 131.9, 116.6 (dd, *J* = 41.4, 17.2 Hz), 110.1.

**HRMS (ESI) m/z:** [M+H]<sup>+</sup> Calcd for C<sub>6</sub>H<sub>5</sub>D<sub>2</sub>BrN<sup>+</sup> 173.9882; Found 173.9882.

The 2 mg of 4-Bromoaniline and **2k** was weighed separately into a 2 mL glass bottle. Then 2 mL DCM was added and the sample concentration was 1 mg/mL. Measure the sample using GCMS and calculate the deuteration rate based on the results of GCMS.

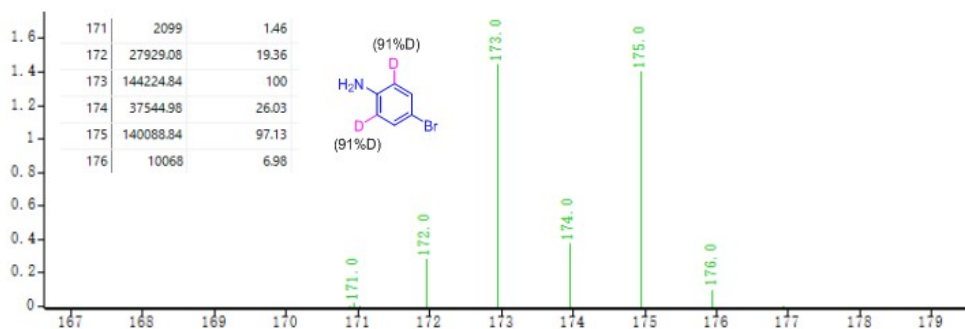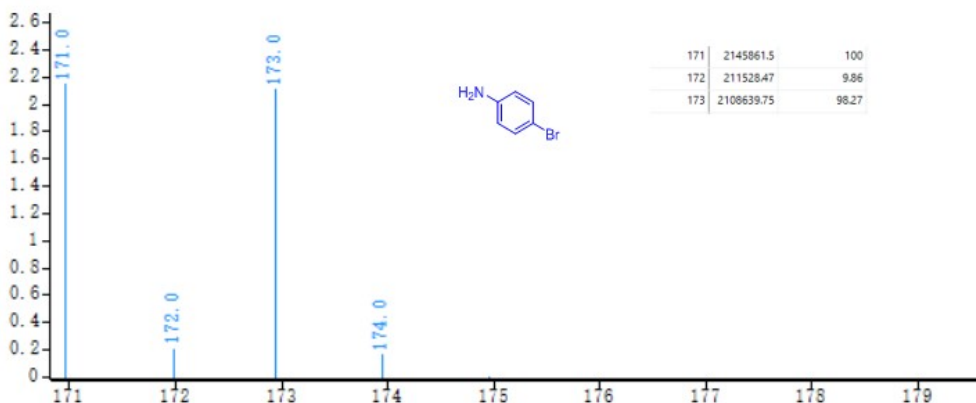

**2k:** 0D%=1%; 1D%=2%; 2D%=97%

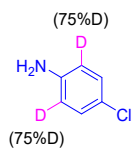

#### 4-Chlorobenzen-2,6-*d*<sub>2</sub>-amine (**2l**)

The title compound was prepared from 1-Chloro-4-nitrobenzene (157.0 mg, 0.9 mmol). The crude residue was purified by flash chromatography (petroleum ether / ethyl acetate = 10:1, R<sub>f</sub> = 0.30) to give the product as a brown solid (general procedure: 104.5 mg, 81%).

<sup>1</sup>H NMR (500 MHz, CDCl<sub>3</sub>) δ 7.13 (s, 2H), 6.62 (d, *J* = 9.0 Hz, 0.51H), 3.58 (s, 3H).

<sup>13</sup>C NMR (126 MHz, CDCl<sub>3</sub>) δ 144.9, 129.0, 123.1, 116.4 – 115.7 (m).

HRMS (ESI) *m/z*: [M+H]<sup>+</sup> Calcd for C<sub>6</sub>H<sub>5</sub>ClD<sub>2</sub>N<sup>+</sup> 130.0387; Found 130.0388.

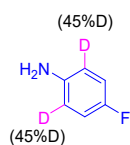

#### 4-Fluorobenzen-2,6-*d*<sub>2</sub>-amine (**2m**)

The title compound was prepared from 1-Fluoro-4-nitrobenzene (141.1 mg, 1 mmol). The crude residue was purified by flash chromatography (petroleum ether / ethyl acetate = 10:1, R<sub>f</sub> = 0.30) to give the product as a brown solid (general procedure: 96.1 mg, 85%).

<sup>1</sup>H NMR (500 MHz, CDCl<sub>3</sub>) δ 6.88 (ddd, *J* = 8.6, 4.4, 1.0 Hz, 2H), 6.68 – 6.59 (m, 1.1H), 3.40 (s, 3H).

<sup>13</sup>C NMR (126 MHz, CDCl<sub>3</sub>) δ 156.5 (d, *J* = 235.8 Hz), 142.3, 115.9 (d, *J* = 60.8 Hz).

**$^{19}\text{F}$  NMR (471 MHz,  $\text{CDCl}_3$ )**  $\delta$  -126.79 (td,  $J$  = 8.6, 3.3 Hz).

**HRMS (ESI) m/z:**  $[\text{M}+\text{H}]^+$  Calcd for  $\text{C}_6\text{H}_5\text{D}_2\text{FN}^+$  114.0683; Found 114.0686.

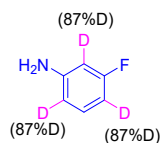

### 3-Fluorobenzen-2,4,6- $d_3$ -amine (2n)

The title compound was prepared from 1-Fluoro-3-nitrobenzene (141.1 mg, 1 mmol). The crude residue was purified by flash chromatography (petroleum ether / ethyl acetate = 10:1,  $R_f$  = 0.30) to give the product as a brown solid (general procedure: 76.8 mg, 69%).

**$^1\text{H}$  NMR (500 MHz,  $\text{CDCl}_3$ )**  $\delta$  7.11 (d,  $J$  = 6.6 Hz, 1H), 6.47 (t,  $J$  = 8.7 Hz, 0.25H), 6.40 (d,  $J$  = 11.0 Hz, 0.13H), 3.58 (s, 2H).

**$^{13}\text{C}$  NMR (126 MHz,  $\text{CDCl}_3$ )**  $\delta$  163.8 (d,  $J$  = 243.3 Hz), 148.1 (d,  $J$  = 10.08 Hz), 130.2 (d,  $J$  = 9.7 Hz), 110.9–110.1 (m), 105.4–104.5 (m), 102.5–101.4 (m).

**$^{19}\text{F}$  NMR (471 MHz,  $\text{CDCl}_3$ )**  $\delta$  -111.43 – -116.46 (m).

**HRMS (ESI) m/z:**  $[\text{M}+\text{H}]^+$  Calcd for  $\text{C}_6\text{H}_4\text{D}_3\text{FN}^+$  115.0745; Found 115.0749.

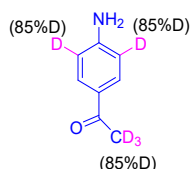

### 1-(4-Aminophenyl-3,5- $d_2$ )ethan-1-one (2o)

The title compound was prepared from 1-(4-Aminophenyl)ethan-1-one (165.1 mg, 1 mmol). The crude residue was purified by flash chromatography (petroleum ether / ethyl acetate = 10:1,  $R_f$  = 0.20) to give the product as a red solid (general procedure: 112.3 mg, 82%).

**$^1\text{H}$  NMR (500 MHz,  $\text{CDCl}_3$ )**  $\delta$  7.79 (s, 2H), 6.64 (d,  $J$  = 9.0 Hz, 0.3H), 4.27 (s, 2H), 2.46 (s, 0.45H).

**$^{13}\text{C}$  NMR (126 MHz,  $\text{CDCl}_3$ )**  $\delta$  196.9, 151.4, 130.7, 127.5, 113.5 (dd,  $J$  = 41.7, 17.6 Hz), 29.7.

**HRMS (ESI) m/z:**  $[\text{M}+\text{H}]^+$  Calcd for  $\text{C}_8\text{H}_5\text{D}_2\text{NO}^+$  141.0502; Found 141.0511.

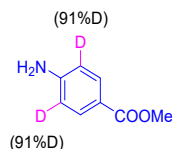

### Methyl-4-aminobenzoate-3,5- $d_2$ (2p)

The title compound was prepared from methyl-4-nitrobenzoate (181.1 mg, 1 mmol). The crude residue was purified by flash chromatography (petroleum ether / ethyl acetate = 5:1,  $R_f$  = 0.30) to give the product as a brown solid (general procedure: 147.1 mg, 96%).

**$^1\text{H}$  NMR (500 MHz,  $\text{CDCl}_3$ )**  $\delta$  7.84 (s, 2H), 6.62 (d,  $J$  = 8.9 Hz, 0.18H), 4.05 (s, 2H), 3.84 (s, 3H).

**$^{13}\text{C}$  NMR (126 MHz,  $\text{CDCl}_3$ )**  $\delta$  144.5, 138.1, 116.6 (d,  $J$  = 12.8 Hz), 115.7 (d,  $J$  = 13.7 Hz), 42.3, 29.7.

**HRMS (ESI) m/z:**  $[\text{M}+\text{H}]^+$  Calcd for  $\text{C}_8\text{H}_8\text{D}_2\text{NO}_2^+$  153.0831; Found 153.0833.

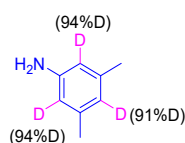

### 3,5-Dimethylbenzen-2,4,6-*d*<sub>3</sub>-amine (2q)

The title compound was prepared from 1,3-Dimethyl-5-nitrobenzene (151.2 mg, 1 mmol). The crude residue was purified by flash chromatography (petroleum ether / ethyl acetate = 10:1, *R<sub>f</sub>* = 0.30) to give the product as a brown solid (general procedure: 100.5 mg, 81%).

**<sup>1</sup>H NMR (500 MHz, CDCl<sub>3</sub>)** δ 6.48 (s, 0.09H), 6.38 (s, 0.12H), 3.41 (s, 2H), 2.28 (s, 6H).

**<sup>13</sup>C NMR (126 MHz, CDCl<sub>3</sub>)** δ 145.0, 131.0, 125.8, 115.6 (dd, *J* = 41.2, 17.2 Hz), 18.8.

**HRMS (ESI) m/z:** [M+H]<sup>+</sup> Calcd for C<sub>8</sub>H<sub>9</sub>D<sub>3</sub>N<sup>+</sup> 125.1153; Found 125.1154.

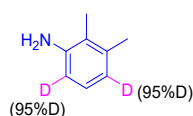

### 2,3-Dimethylbenzen-4,6-*d*<sub>2</sub>-amine (2r)

The title compound was prepared from 1,2-Dimethyl-3-nitrobenzene (151.2 mg, 1 mmol). The crude residue was purified by flash chromatography (petroleum ether / ethyl acetate = 10:1, *R<sub>f</sub>* = 0.30) to give the product as a brown solid (general procedure: 102.1 mg, 83%).

**<sup>1</sup>H NMR (500 MHz, CDCl<sub>3</sub>)** δ 7.00 (s, 1H), 6.71 (d, *J* = 7.5 Hz, 0.05H), 6.63 (d, *J* = 7.9 Hz, 0.05H), 3.53 (s, 2H), 2.35 (s, 3H), 2.15 (s, 3H).

**<sup>13</sup>C NMR (126 MHz, CDCl<sub>3</sub>)** δ 144.5, 137.1, 125.9, 120.7 (d, *J* = 72.5 Hz), 113.0, 20.5, 12.9.

**HRMS (ESI) m/z:** [M+H]<sup>+</sup> Calcd for C<sub>8</sub>H<sub>10</sub>D<sub>2</sub>N<sup>+</sup> 124.1090; Found 124.1092.

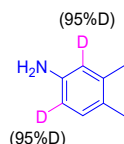

### 2,3-Dimethylbenzen-4,6-*d*<sub>2</sub>-amine (2s)

The title compound was prepared from 1,2-Dimethyl-4-nitrobenzene (151.2 mg, 1 mmol). The crude residue was purified by flash chromatography (petroleum ether / ethyl acetate = 10:1, *R<sub>f</sub>* = 0.30) to give the product as a brown solid (general procedure: 104.7 mg, 85%).

**<sup>1</sup>H NMR (500 MHz, CDCl<sub>3</sub>)** δ 6.96 (s, 1H), 6.56 (s, 0.05H), 6.50 (d, *J* = 7.9 Hz, 0.05H), 3.33 (s, 2H), 2.22 (s, 3H), 2.20 (s, 3H).

**<sup>13</sup>C NMR (126 MHz, CDCl<sub>3</sub>)** δ 144.1, 137.3, 130.2, 126.6, 116.7 (dd, *J* = 43.0, 19.5 Hz), 112.5 (dd, *J* = 41.5, 17.2 Hz), 19.8, 18.8.

**HRMS (ESI) m/z:** [M+H]<sup>+</sup> Calcd for C<sub>8</sub>H<sub>10</sub>D<sub>2</sub>N<sup>+</sup> 124.1090; Found 124.1092.

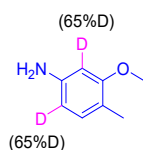

### 3-Methoxy-4-methylbenzen-2,6-*d*<sub>2</sub>-amine (2t)

The title compound was prepared from 2-Methoxy-1-methyl-4-nitrobenzene (167.1 mg, 1 mmol). The crude residue was purified by flash chromatography (petroleum ether / ethyl acetate = 10:1,  $R_f$  = 0.20) to give the product as a yellow solid (general procedure: 126.5 mg, 91%).

**$^1\text{H}$  NMR (500 MHz,  $\text{CDCl}_3$ )**  $\delta$  6.96 – 6.92 (m, 1H), 6.26 (d,  $J$  = 7.8 Hz, 0.7H), 3.81 (s, 3H), 3.47 (s, 2H), 2.16 (s, 3H).

**$^{13}\text{C}$  NMR (126 MHz,  $\text{CDCl}_3$ )**  $\delta$  158.4, 145.5, 131.0, 116.5, 106.8, 98.4 (dd,  $J$  = 40.2, 16.5 Hz), 55.2, 15.4.

**HRMS (ESI)  $m/z$ :**  $[\text{M}+\text{H}]^+$  Calcd for  $\text{C}_8\text{H}_{10}\text{D}_2\text{NO}^+$  140.1039; Found 140.1039.

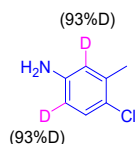

#### 4-Chloro-3-methylbenzen-2,6- $d_2$ -amine (2u)

The title compound was prepared from 1-Chloro-2-methyl-4-nitrobenzene (171.0 mg, 1 mmol). The crude residue was purified by flash chromatography (petroleum ether / ethyl acetate = 10:1,  $R_f$  = 0.30) to give the product as a brown solid (general procedure: 115.9 mg, 81%).

**$^1\text{H}$  NMR (500 MHz,  $\text{CDCl}_3$ )**  $\delta$  7.12 (s, 1H), 6.57 (s, 0.07H), 6.48 (d,  $J$  = 8.4 Hz, 0.07H), 3.53 (s, 2H), 2.31 (s, 3H).

**$^{13}\text{C}$  NMR (126 MHz,  $\text{CDCl}_3$ )**  $\delta$  144.9, 136.6, 129.4, 123.5, 117.3 (dd,  $J$  = 42.6, 18.8 Hz), 113.7 (dd,  $J$  = 40.9, 16.8 Hz), 20.1.

**HRMS (ESI)  $m/z$ :**  $[\text{M}+\text{H}]^+$  Calcd for  $\text{C}_7\text{H}_7\text{D}_2\text{ClN}^+$  144.0544; Found 144.0544.

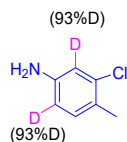

#### 3-Chloro-4-methylbenzen-2,6- $d_2$ -amine (2v)

The title compound was prepared from 2-Chloro-1-methyl-4-nitrobenzene (171.0 mg, 1 mmol). The crude residue was purified by flash chromatography (petroleum ether / ethyl acetate = 10:1,  $R_f$  = 0.30) to give the product as a yellow solid (general procedure: 123.0 mg, 86%).

**$^1\text{H}$  NMR (500 MHz,  $\text{CDCl}_3$ )**  $\delta$  7.02 (s, 1H), 6.73 (s, 0.07H), 6.52 (d,  $J$  = 8.1 Hz, 0.07H), 3.51 (s, 2H), 2.29 (s, 3H).

**$^{13}\text{C}$  NMR (126 MHz,  $\text{CDCl}_3$ )**  $\delta$  145.3, 134.5, 131.3, 125.5, 115.4 (dd,  $J$  = 42.2, 17.8 Hz), 113.6 (dd,  $J$  = 41.3, 17.2 Hz), 19.0.

**HRMS (ESI)  $m/z$ :**  $[\text{M}+\text{H}]^+$  Calcd for  $\text{C}_7\text{H}_7\text{D}_2\text{ClN}^+$  144.0544; Found 144.0545.

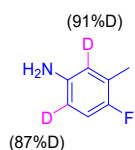

#### 4-Fluoro-3-methylbenzen-2,6- $d_2$ -amine (2w)

The title compound was prepared from 1-fluoro-2-methyl-4-nitrobenzene (155.0 mg, 0.9 mmol). The crude residue was purified by flash chromatography (petroleum ether / ethyl acetate = 10:1,  $R_f$  = 0.30) to give the product as a red oil (general procedure: 110.5 mg, 87%).

**$^1\text{H}$  NMR (500 MHz,  $\text{CDCl}_3$ )**  $\delta$  6.82 (d,  $J$  = 9.4 Hz, 1H), 6.52 (d,  $J$  = 6.4 Hz, 0.1H), 6.47 (dd,  $J$  = 8.6, 4.0 Hz, 0.1H), 3.35 (s, 2H), 2.22 (s, 3H).

**$^{13}\text{C}$  NMR (126 MHz,  $\text{CDCl}_3$ )**  $\delta$  155.1 (d,  $J$  = 234.0 Hz), 141.9 (d,  $J$  = 2.52 Hz), 125.2 (d,  $J$  = 18.9 Hz), 117.8, 115.2 (d,  $J$  = 23.94 Hz), 113.4, 14.6.

**$^{19}\text{F}$  NMR (471 MHz,  $\text{CDCl}_3$ )**  $\delta$  -130.23 – -132.59 (m).

**HRMS (ESI)  $m/z$ :**  $[\text{M}+\text{H}]^+$  Calcd for  $\text{C}_7\text{H}_7\text{D}_2\text{FN}^+$  128.0839; Found 128.0841.

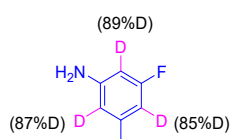

### 3-Fluoro-5-methylbenzen-2,4,6- $d_3$ -amine (2x)

The title compound was prepared from 1-Fluoro-3-methyl-5-nitrobenzene (155.0 mg, 1 mmol). The crude residue was purified by flash chromatography (petroleum ether / ethyl acetate = 10:1,  $R_f$  = 0.30) to give the product as a yellow solid (general procedure: 101.2 mg, 79%).

**$^1\text{H}$  NMR (500 MHz,  $\text{CDCl}_3$ )**  $\delta$  6.31 (d,  $J$  = 9.9 Hz, 0.13H), 6.29 (s, 0.15H), 6.22 (d,  $J$  = 10.7 Hz, 0.11H), 3.60 (s, 2H), 2.27 (s, 3H).

**$^{13}\text{C}$  NMR (126 MHz,  $\text{CDCl}_3$ )**  $\delta$  163.8 (d,  $J$  = 242.6 Hz), 147.7 (d,  $J$  = 11.34 Hz), 140.8 (d,  $J$  = 10.08 Hz), 111.2, 105.9, 99.1, 21.3.

**$^{19}\text{F}$  NMR (471 MHz,  $\text{CDCl}_3$ )**  $\delta$  -112.42 – -118.13 (m).

**HRMS (ESI)  $m/z$ :**  $[\text{M}+\text{H}]^+$  Calcd for  $\text{C}_7\text{H}_6\text{D}_3\text{FN}^+$  129.0902; Found 129.0903.

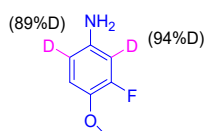

### 3-Fluoro-4-methoxybenzen-2,6- $d_2$ -amine (2y)

The title compound was prepared from 2-Fluoro-1-methoxy-4-nitrobenzene (171.0 mg, 1 mmol). The crude residue was purified by flash chromatography (petroleum ether / ethyl acetate = 10:1,  $R_f$  = 0.20) to give the product as a yellow solid (general procedure: 128.7 mg, 90%).

**$^1\text{H}$  NMR (500 MHz,  $\text{CDCl}_3$ )**  $\delta$  6.86 (d,  $J$  = 11.3 Hz, 1H), 6.32 (d,  $J$  = 7.2 Hz, 0.06H), 6.17 (dd,  $J$  = 8.5, 3.4 Hz, 0.11H), 3.83 (s, 3H), 3.49 (s, 2H).

**$^{13}\text{C}$  NMR (126 MHz,  $\text{CDCl}_3$ )**  $\delta$  147.9 (d,  $J$  = 11.34 Hz), 147.1, 145.2, 143.0, 116.1 (d,  $J$  = 18.9 Hz), 106.4, 56.1.

**$^{19}\text{F}$  NMR (471 MHz,  $\text{CDCl}_3$ )**  $\delta$  -144.08 – -153.51 (m).

**HRMS (ESI)  $m/z$ :**  $[\text{M}+\text{H}]^+$  Calcd for  $\text{C}_7\text{H}_7\text{D}_2\text{FNO}^+$  144.0788; Found 144.0802.

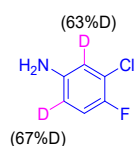

### 3-Chloro-4-fluorobenzen-2,6-*d*<sub>2</sub>-amine (2z)

The title compound was prepared from 2-Chloro-1-fluoro-4-nitrobenzene (175.0 mg, 1 mmol). The crude residue was purified by flash chromatography (petroleum ether / ethyl acetate = 10:1, R<sub>f</sub> = 0.30) to give the product as a red solid (general procedure: 127.9 mg, 87%).

<sup>1</sup>H NMR (500 MHz, CDCl<sub>3</sub>) δ 6.93 (dt, *J* = 8.8, 4.4 Hz, 1H), 6.70 (d, *J* = 6.1 Hz, 0.37H), 6.51 (dd, *J* = 8.8, 3.8 Hz, 0.33H), 3.53 (s, 2H).

<sup>13</sup>C NMR (126 MHz, CDCl<sub>3</sub>) δ 151.6 (d, *J* = 238.2 Hz), 143.2, 120.8, 116.7 (d, *J* = 21.42 Hz), 114.3 (d, *J* = 6.3 Hz).

<sup>19</sup>F NMR (471 MHz, CDCl<sub>3</sub>) δ -128.55 – -131.60 (m).

HRMS (ESI) *m/z*: [M+H]<sup>+</sup> Calcd for C<sub>6</sub>H<sub>4</sub>D<sub>2</sub>ClFN<sup>+</sup> 148.0293; Found 148.0282.

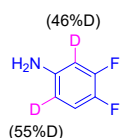

### 3,4-Difluorobenzen-2,6-*d*<sub>2</sub>-amine (2aa)

The title compound was prepared from 3,4-Difluoro-1-nitrobenzene (159.0 mg, 1 mmol). The crude residue was purified by flash chromatography (petroleum ether / ethyl acetate = 10:1, R<sub>f</sub> = 0.30) to give the product as a brown solid (general procedure: 108.9 mg, 83%).

<sup>1</sup>H NMR (500 MHz, CDCl<sub>3</sub>) δ 6.95 (t, *J* = 9.1 Hz, 1.45H), 6.50 (dd, *J* = 12.0, 6.7 Hz, 0.54H), 3.57 (s, 2H).

<sup>13</sup>C NMR (126 MHz, CDCl<sub>3</sub>) δ 152.7 (dd, *J* = 10.2, 5.9 Hz), 150.7 (dd, *J* = 10.3, 5.8 Hz), 133.9 (t, *J* = 15.4 Hz), 132.0 (t, *J* = 15.6 Hz), 98.5 (dd, *J* = 47.7, 22.8 Hz).

<sup>19</sup>F NMR (471 MHz, CDCl<sub>3</sub>) δ -130.23 – -140.35 (m).

HRMS (ESI) *m/z*: [M+H]<sup>+</sup> Calcd for C<sub>6</sub>H<sub>4</sub>D<sub>2</sub>F<sub>2</sub>N<sup>+</sup> 132.0588; Found 132.0581.

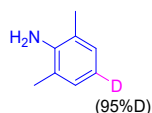

### 2,6-Dimethylbenzen-4-*d*-amine (2ab)

The title compound was prepared from 1,3-Dimethyl-2-nitrobenzene (151.1 mg, 1 mmol). The crude residue was purified by flash chromatography (petroleum ether / ethyl acetate = 10:1, R<sub>f</sub> = 0.30) to give the product as a yellow oil (general procedure: 85.5 mg, 70%).

<sup>1</sup>H NMR (500 MHz, CDCl<sub>3</sub>) δ 6.97 (s, 2H), 6.67 (t, *J* = 7.4 Hz, 0.05H), 3.41 (s, 2H), 2.20 (s, 6H).

<sup>13</sup>C NMR (126 MHz, CDCl<sub>3</sub>) δ 142.7, 128.2, 121.8, 117.9 (dd, *J* = 41.0, 16.8 Hz), 17.7.

HRMS (ESI) *m/z*: [M+H]<sup>+</sup> Calcd for C<sub>8</sub>H<sub>11</sub>DN<sup>+</sup> 123.1027; Found 123.1030.

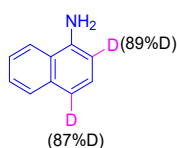

### Naphthalen-2,4-*d*<sub>2</sub>-1-amine (2ac)

The title compound was prepared from 1-nitronaphthalene (173.1 mg, 1 mmol). The crude residue was purified by flash chromatography (petroleum ether / ethyl acetate = 10:1, R<sub>f</sub> = 0.30) to give the product as a yellow solid (general procedure: 123.3 mg, 85%).

**<sup>1</sup>H NMR (500 MHz, CDCl<sub>3</sub>)** δ 7.92 – 7.82 (m, 2H), 7.57 – 7.46 (m, 2.13H), 7.37 (s, 1H), 6.83 (d, *J* = 7.4 Hz, 0.11H), 3.98 (s, 2H).

**<sup>13</sup>C NMR (126 MHz, CDCl<sub>3</sub>)** δ 142.1, 134.4, 128.6, 126.2, 125.9, 124.9, 123.7, 120.9, 118.8 (dd, *J* = 43.7, 19.1 Hz), 109.6 (dd, *J* = 41.6, 17.6 Hz).

**HRMS (ESI) m/z:** [M+H]<sup>+</sup> Calcd for C<sub>10</sub>H<sub>8</sub>D<sub>2</sub>N<sup>+</sup> 146.0933; Found 146.0934.

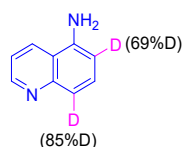

### Quinolin-6,8-*d*<sub>2</sub>-5-amine (2ad)

The title compound was prepared from 5-Nitroquinoline (174.1 mg, 1 mmol). The crude residue was purified by flash chromatography (petroleum ether / ethyl acetate = 10:1, R<sub>f</sub> = 0.20) to give the product as a red solid (general procedure: 112.5 mg, 77%).

**<sup>1</sup>H NMR (500 MHz, CDCl<sub>3</sub>)** δ 8.87 (dd, *J* = 4.2, 1.5 Hz, 1H), 8.17 (dd, *J* = 8.5, 1.5 Hz, 1H), 7.58 (d, *J* = 8.4 Hz, 0.15H), 7.50 (s, 1H), 7.30 (dd, *J* = 8.5, 4.2 Hz, 1H), 6.80 (d, *J* = 7.5 Hz, 0.3H), 4.22 (s, 2H).

**<sup>13</sup>C NMR (126 MHz, CDCl<sub>3</sub>)** δ 150.2, 149.0, 142.4, 130.0, 129.9, 129.7, 119.7 (d, *J* = 42.8 Hz), 118.7, 110.1 – 109.4 (m).

**HRMS (ESI) m/z:** [M+H]<sup>+</sup> Calcd for C<sub>9</sub>H<sub>7</sub>D<sub>2</sub>N<sub>2</sub><sup>+</sup> 147.0886; Found 147.0889.

## 5. Mechanistic Experiments

### Control experiments

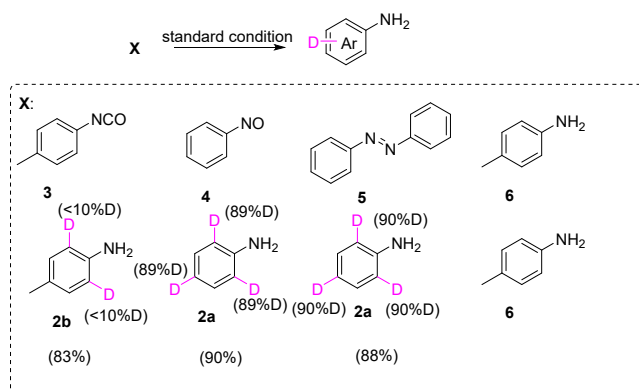

**X** (1 mmol), Mo(CO)<sub>6</sub> (1 mmol) were transferred into an 15 mL tube which was filled with nitrogen. Then, DME (0.5 mL) and D<sub>2</sub>O (10 equiv.) were added to the reaction tube by syringe or microsyringe. The tube was sealed and the mixture was stirred at 120 °C for 8 h. After the reaction was completed, the reaction mixture was filtered and concentrated under vacuum. The crude pr-

oduct was purified by column chromatography on silica gel to afford the corresponding product.

## 6. References

- [1] Precht, M.-H., Teltewskoi, M., Dimitrov, A., et al., Catalytic C–H bond activation at nanoscale Lewis acidic aluminium fluorides: H/D exchange reactions at aromatic and aliphatic hydrocarbons[J]. *Chem. Eur. J.* **2011**, *17*, 14385-14388.
- [2] Atzrodt, J., Derdau, V., Fey, T., et al., The renaissance of H/D exchange[J]. *Angew. Chem. Int. Ed.* **2007**, *46*, 7744-7765.
- [3] Florian B., Nils R., Stephan B., et al., Manganese-Catalysed Deuterium Labelling of Anilines and Electron-Rich (Hetero)Arenes[J]. *Angew. Chem. Int. Ed.* **2022**, *61*, e202202423.
- [4] Hironao S., Nobuhiro I., Hiroyoshi E., et al., Aromatic ring favorable and efficient H–D exchange reaction catalyzed by Pt/C[J]. *Tetrahedron Letters* **2005**, *46*, 6995-6998.

## 7.Copies of NMR Spectra for Compounds

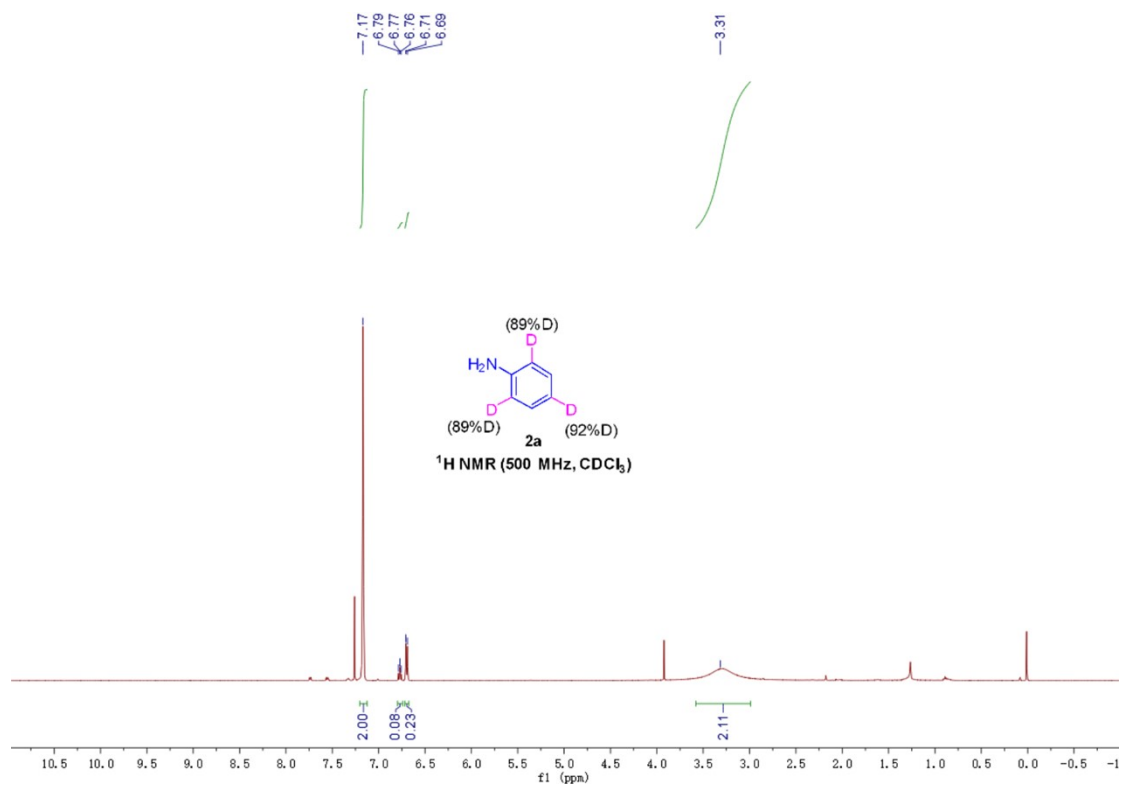

Figure S1. <sup>1</sup>H NMR (500 MHz, CDCl<sub>3</sub>) spectrum of **2a**

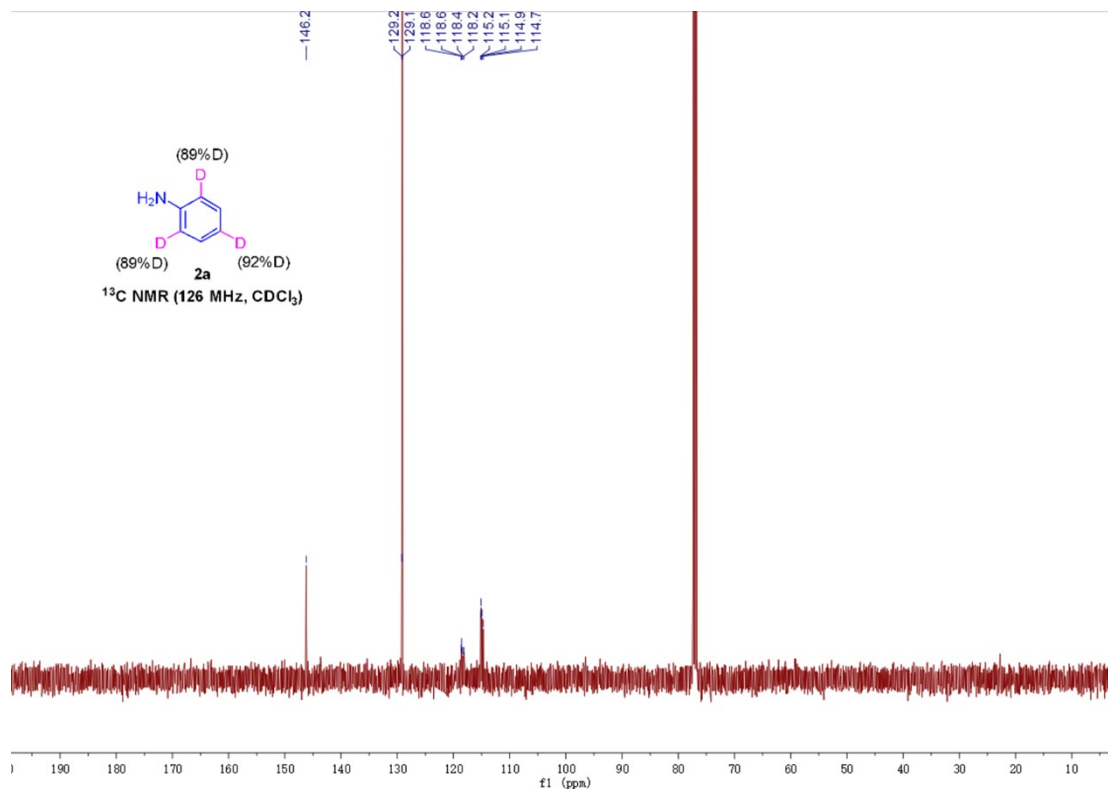

Figure S2. <sup>13</sup>C NMR (126 MHz, CDCl<sub>3</sub>) spectrum of **2a**

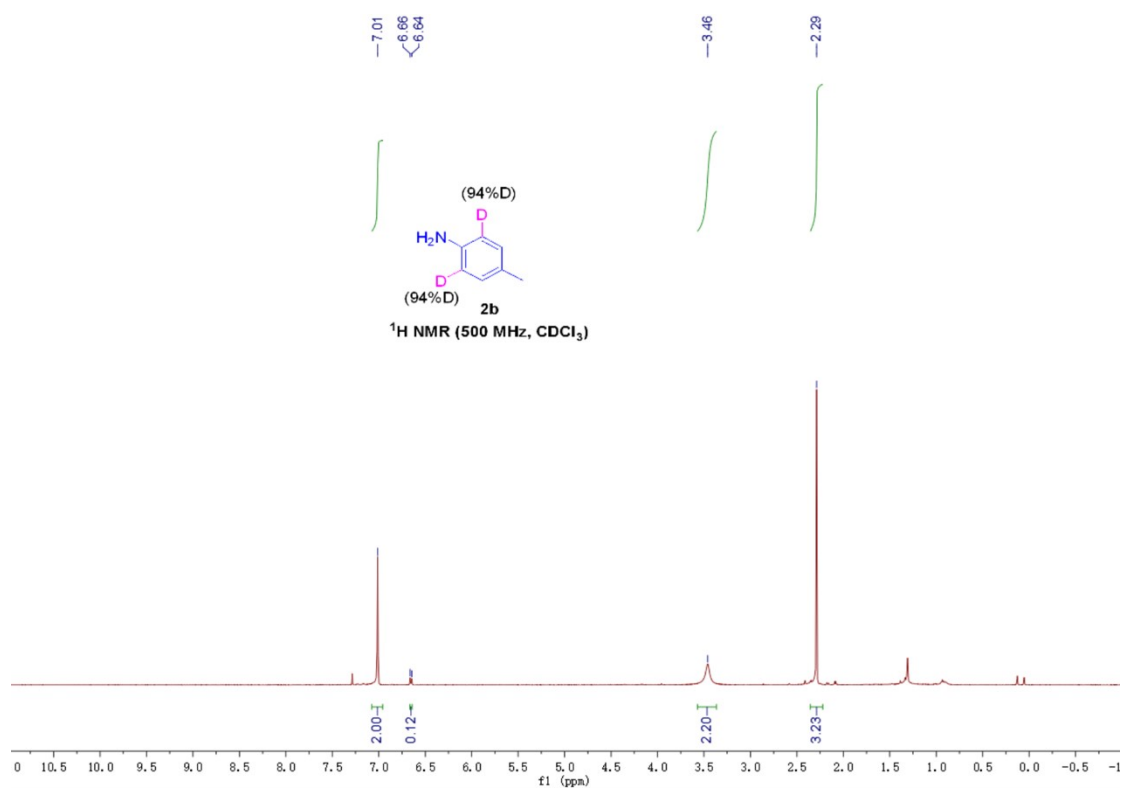

Figure S3. <sup>1</sup>H NMR (500 MHz, CDCl<sub>3</sub>) spectrum of **2b**

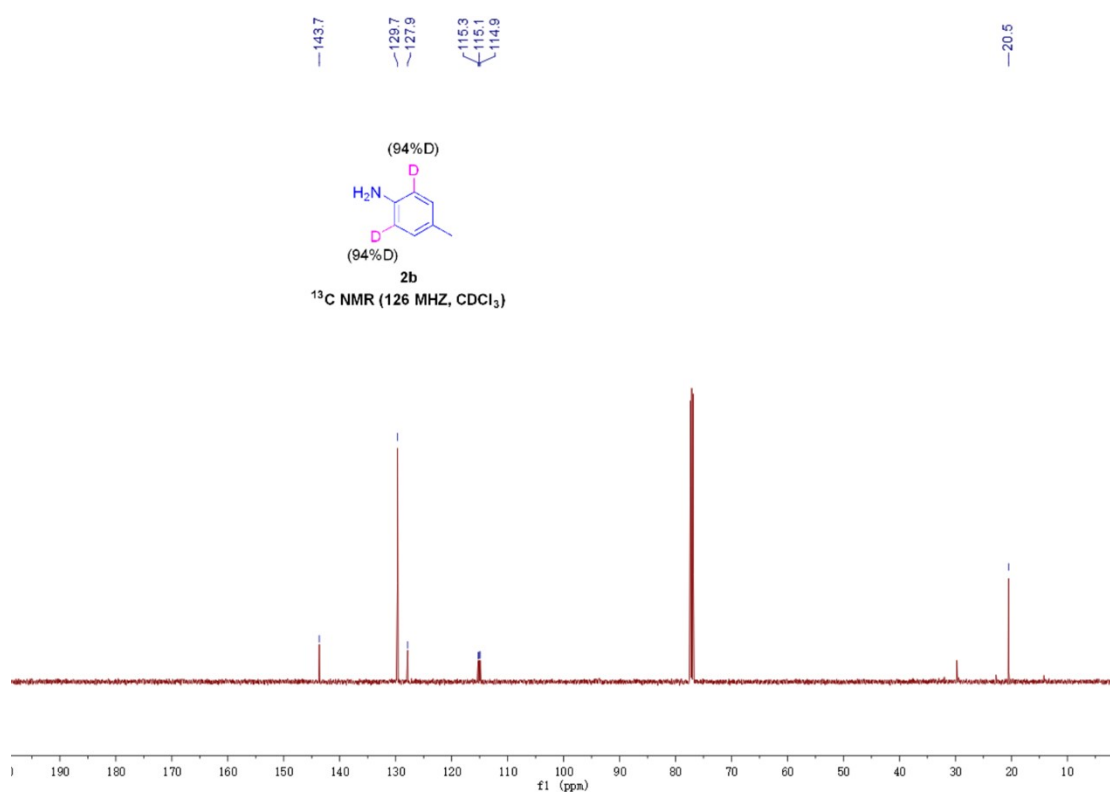

Figure S4. <sup>13</sup>C NMR (126 MHz, CDCl<sub>3</sub>) spectrum of **2b**

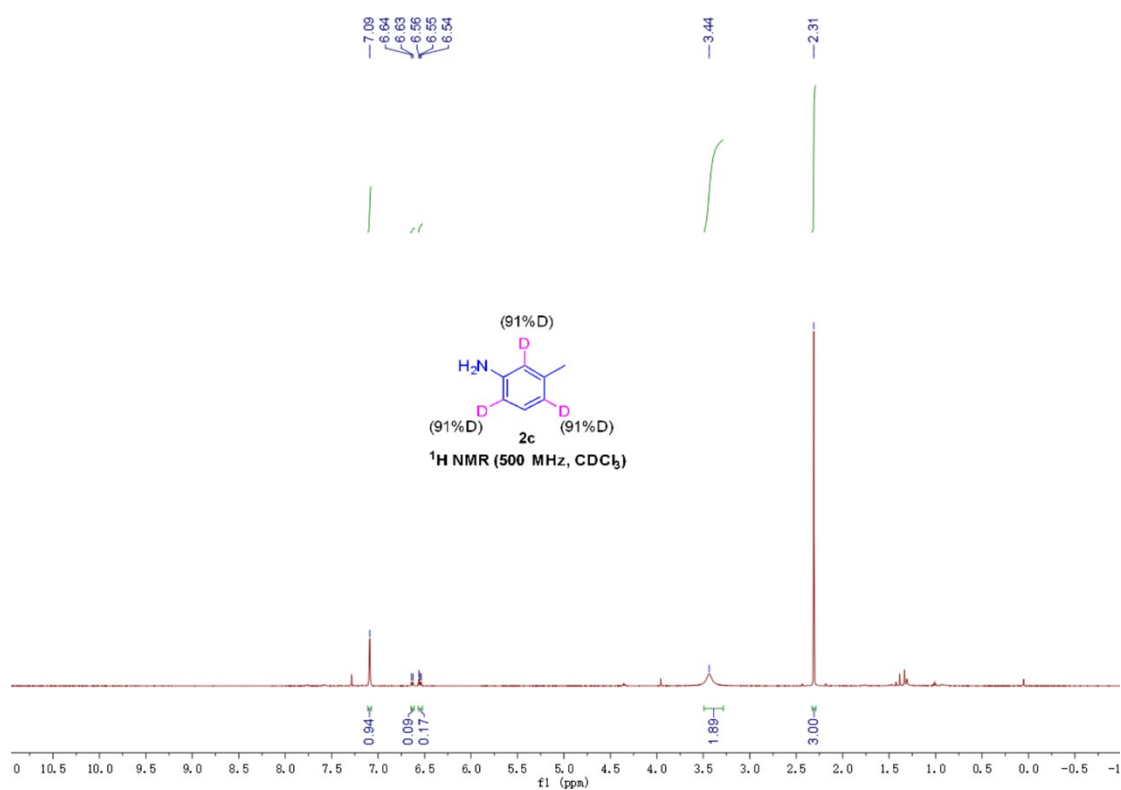

Figure S5. <sup>1</sup>H NMR (500 MHz, CDCl<sub>3</sub>) spectrum of **2c**

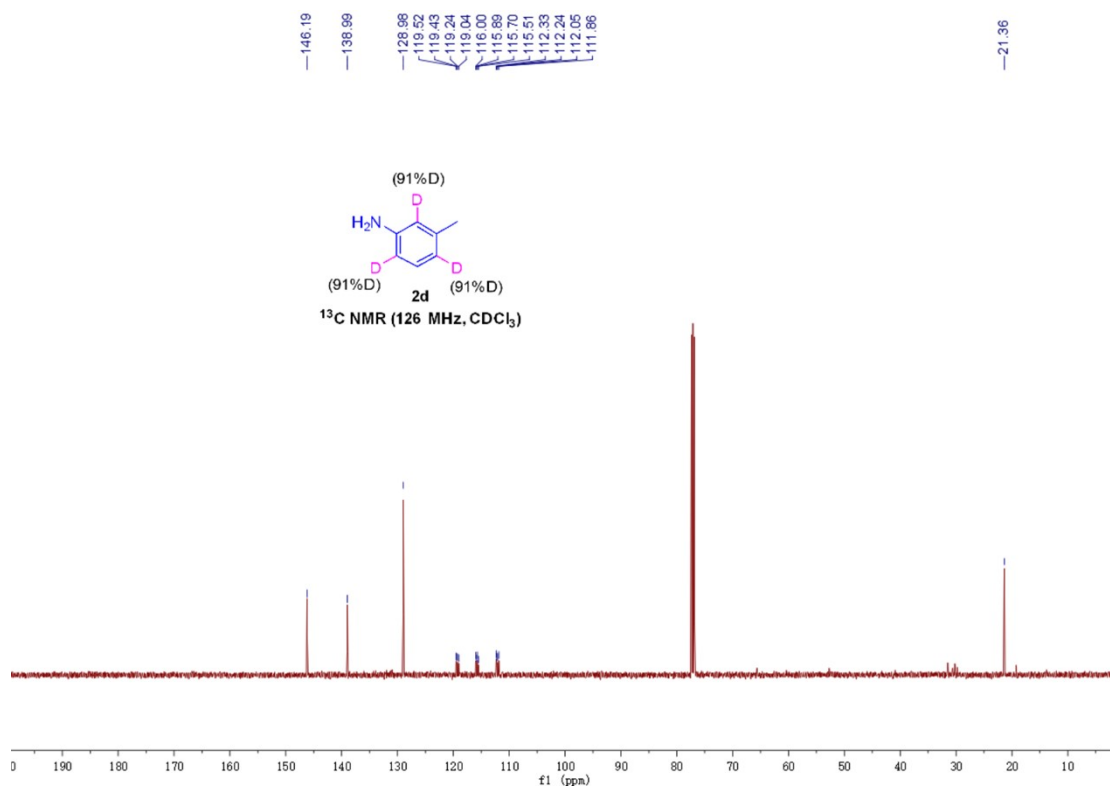

Figure S6. <sup>13</sup>C NMR (126 MHz, CDCl<sub>3</sub>) spectrum of **2c**

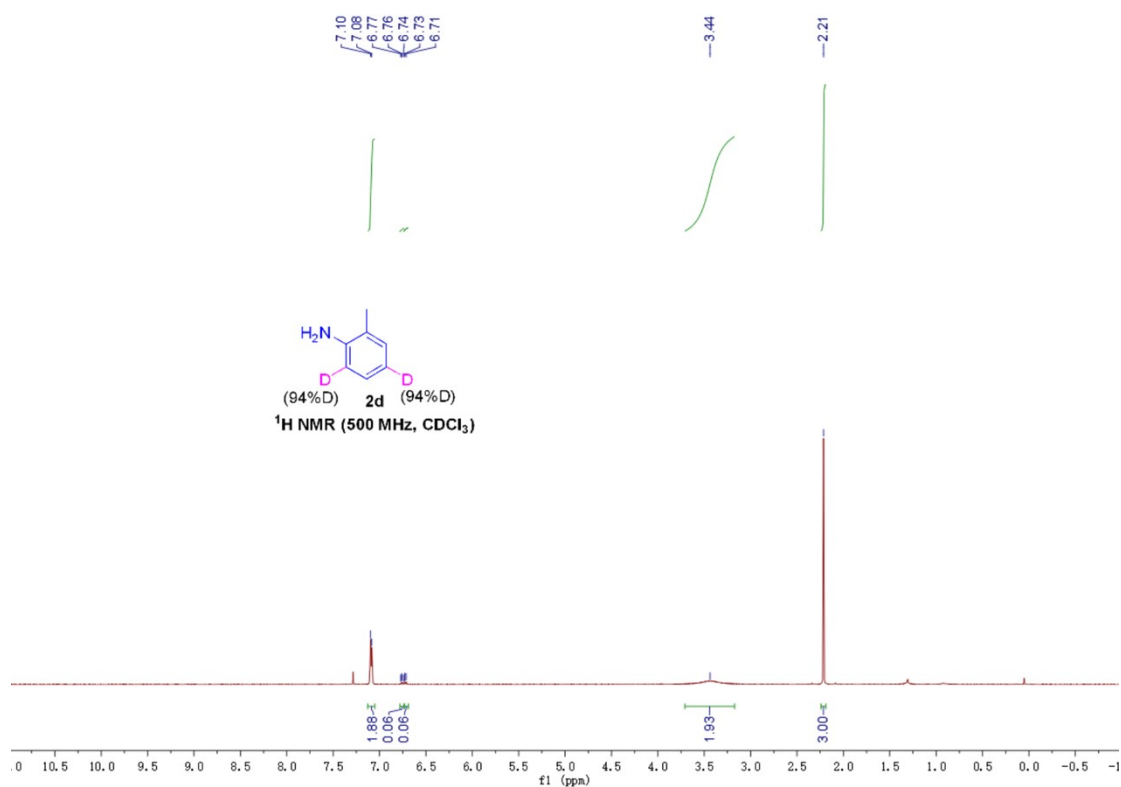

Figure S7. <sup>1</sup>H NMR (500 MHz, CDCl<sub>3</sub>) spectrum of **2d**

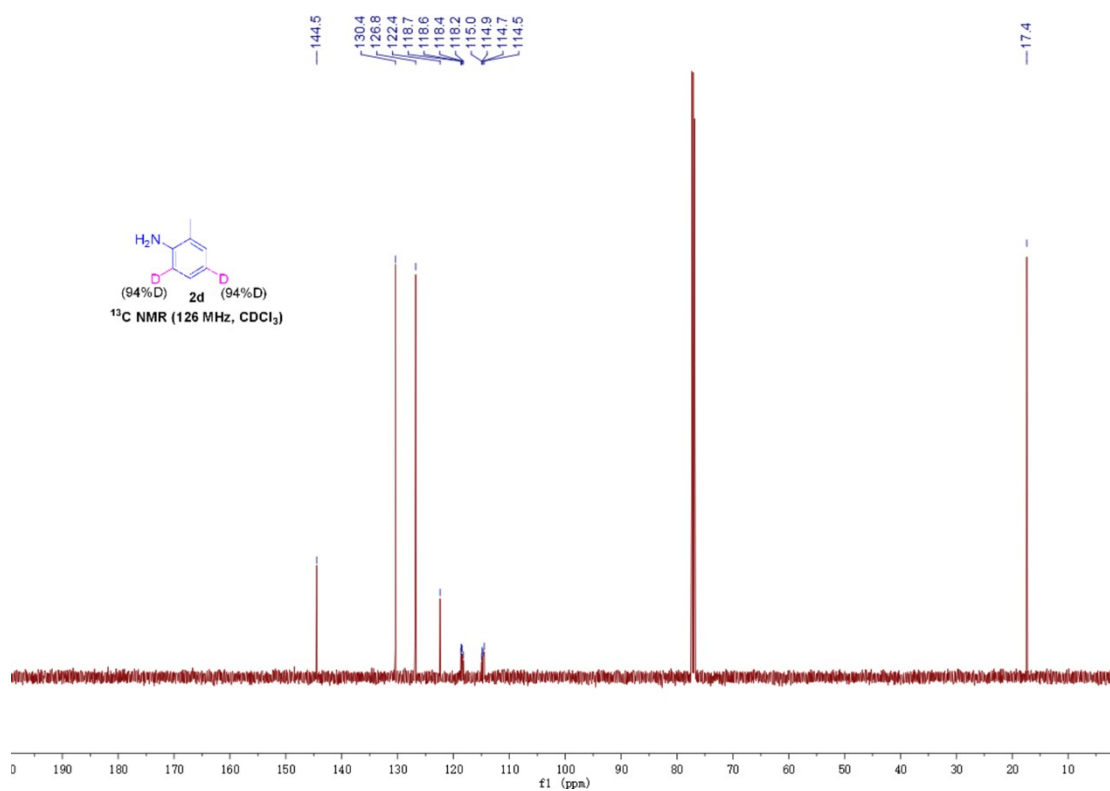

Figure S8. <sup>13</sup>C NMR (126 MHz, CDCl<sub>3</sub>) spectrum of **2d**

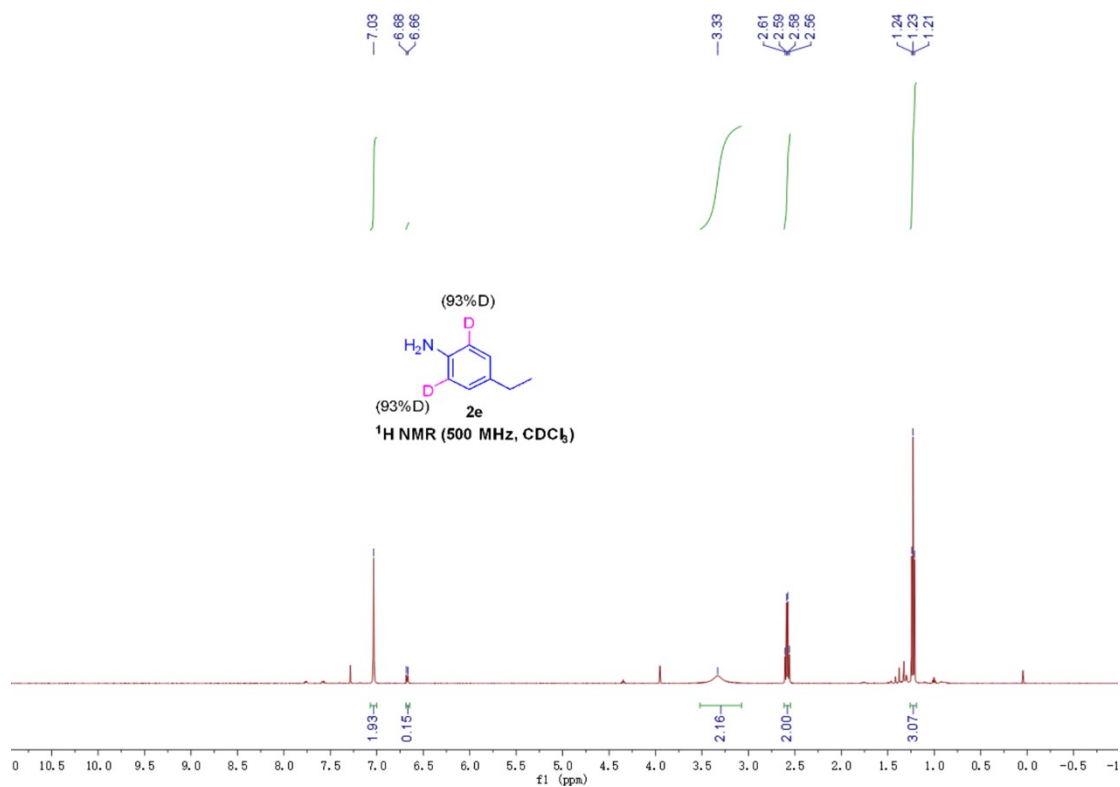

Figure S9.  $^1\text{H}$  NMR (500 MHz,  $\text{CDCl}_3$ ) spectrum of **2e**

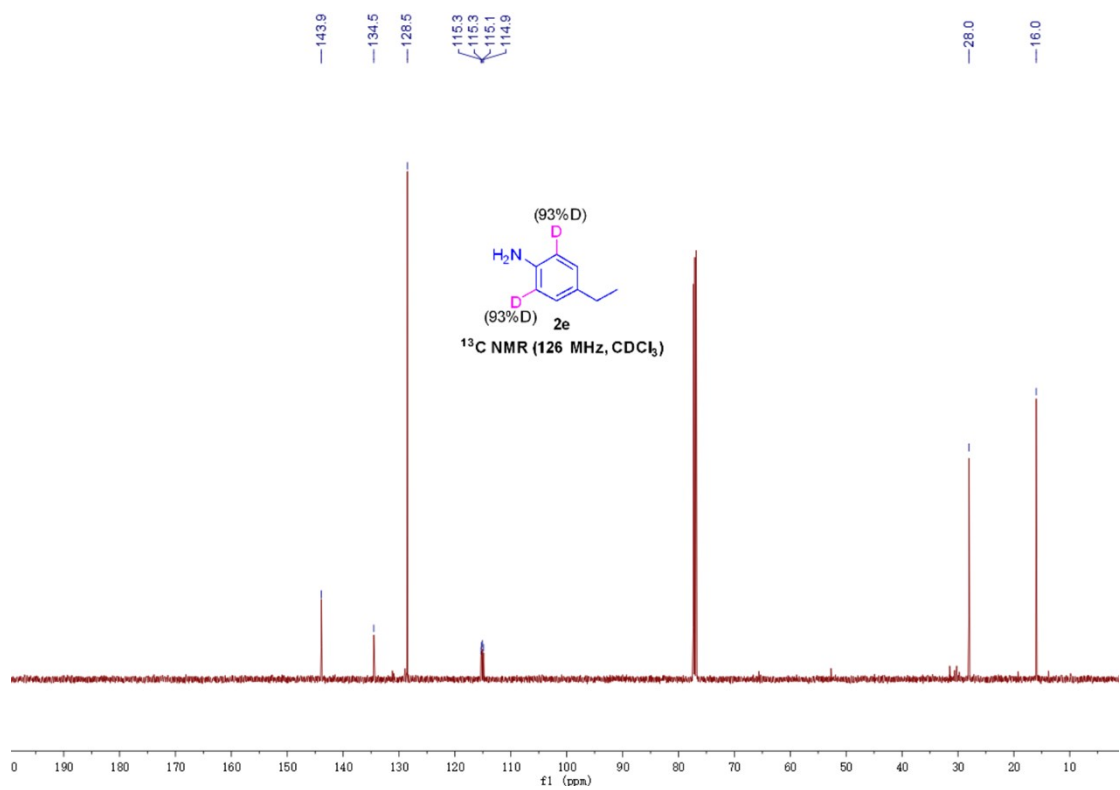

Figure S10.  $^{13}\text{C}$  NMR (126 MHz,  $\text{CDCl}_3$ ) spectrum of **2e**

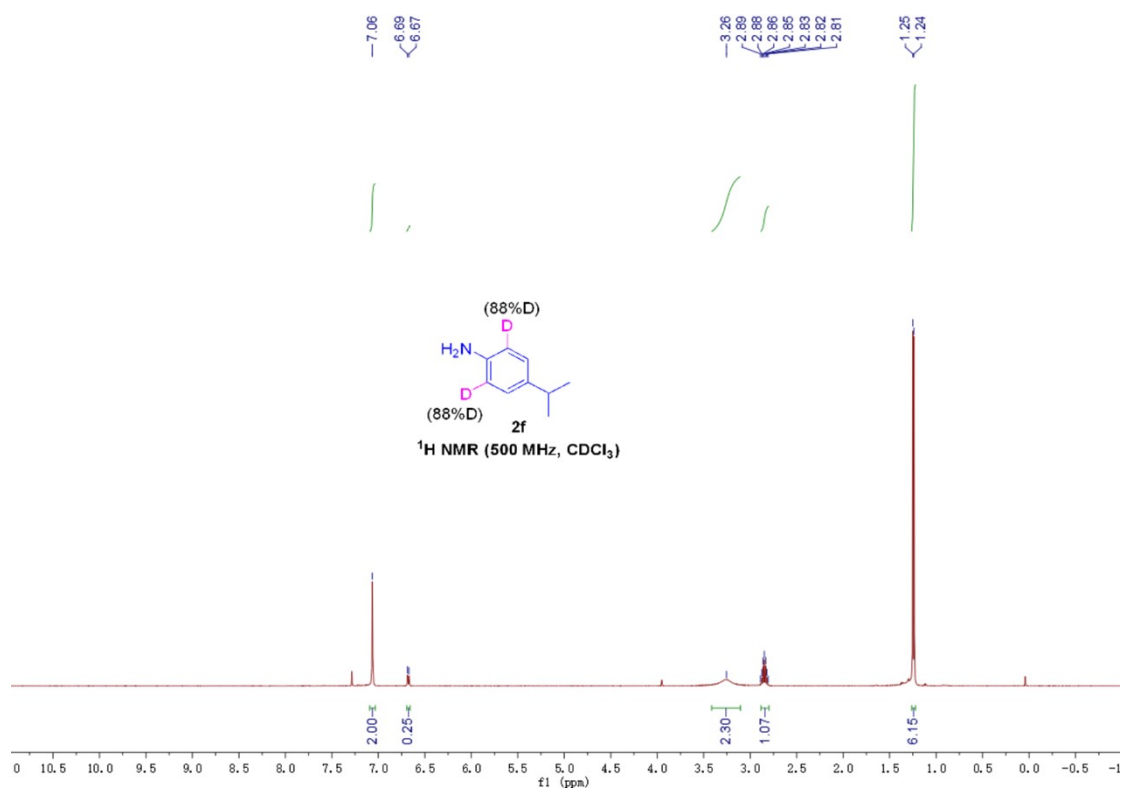

Figure S11.  $^1\text{H}$  NMR (500 MHz,  $\text{CDCl}_3$ ) spectrum of **2f**

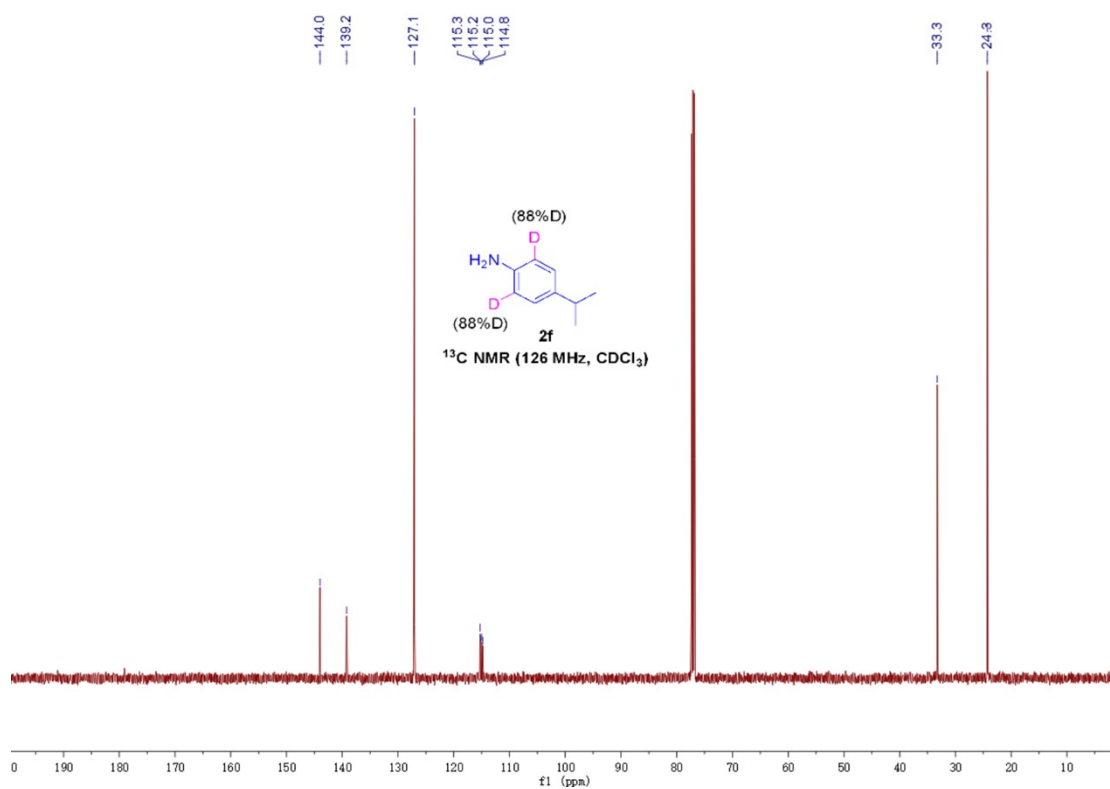

Figure S12.  $^{13}\text{C}$  NMR (126 MHz,  $\text{CDCl}_3$ ) spectrum of **2f**

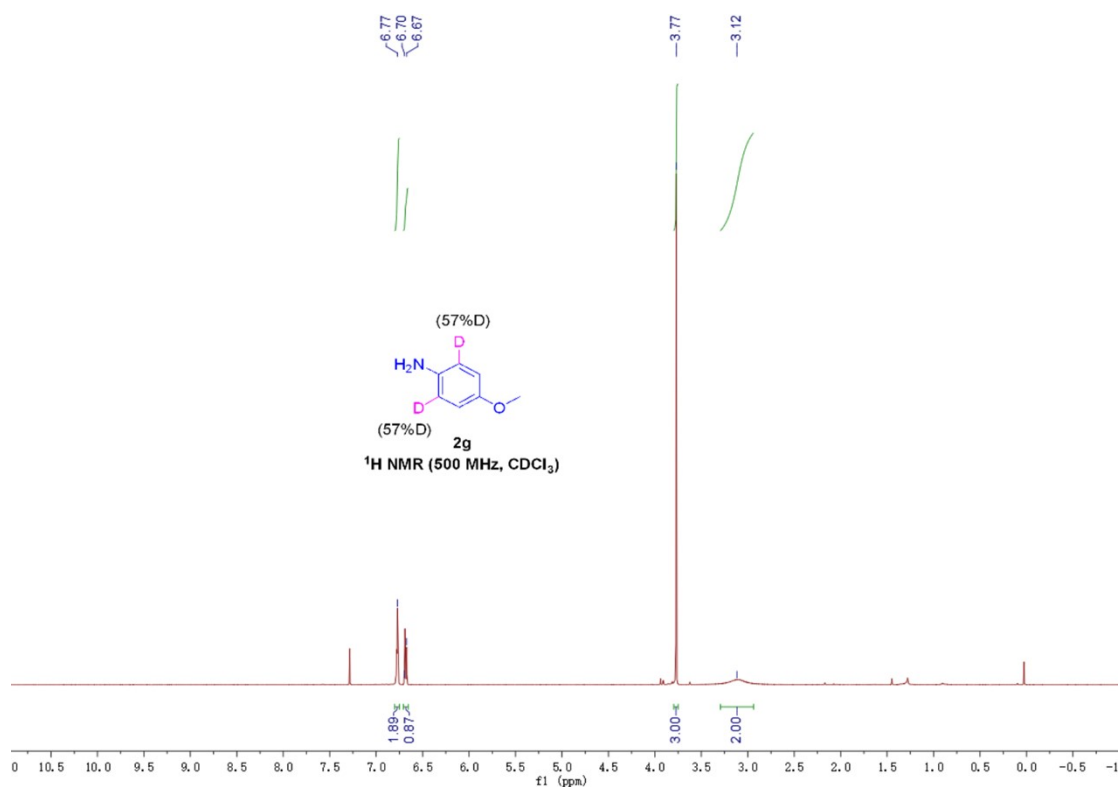

Figure S13.  $^1\text{H}$  NMR (500 MHz,  $\text{CDCl}_3$ ) spectrum of **2g**

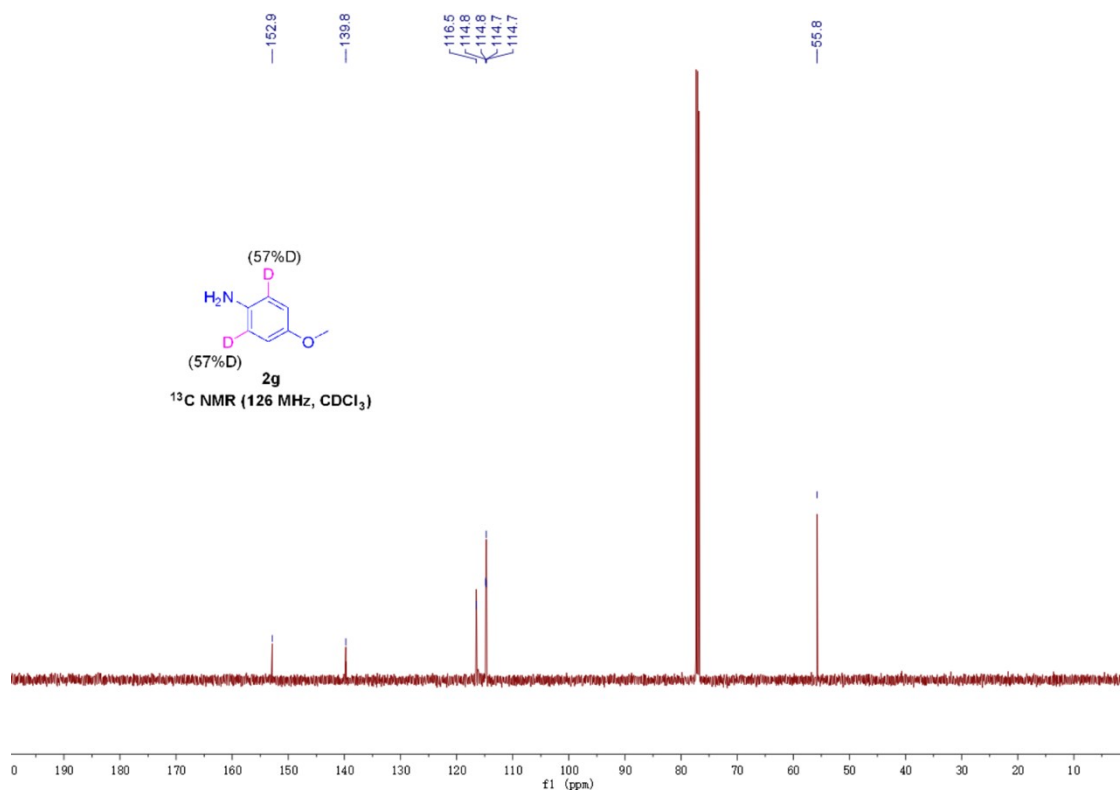

Figure S14.  $^{13}\text{C}$  NMR (126 MHz,  $\text{CDCl}_3$ ) spectrum of **2g**

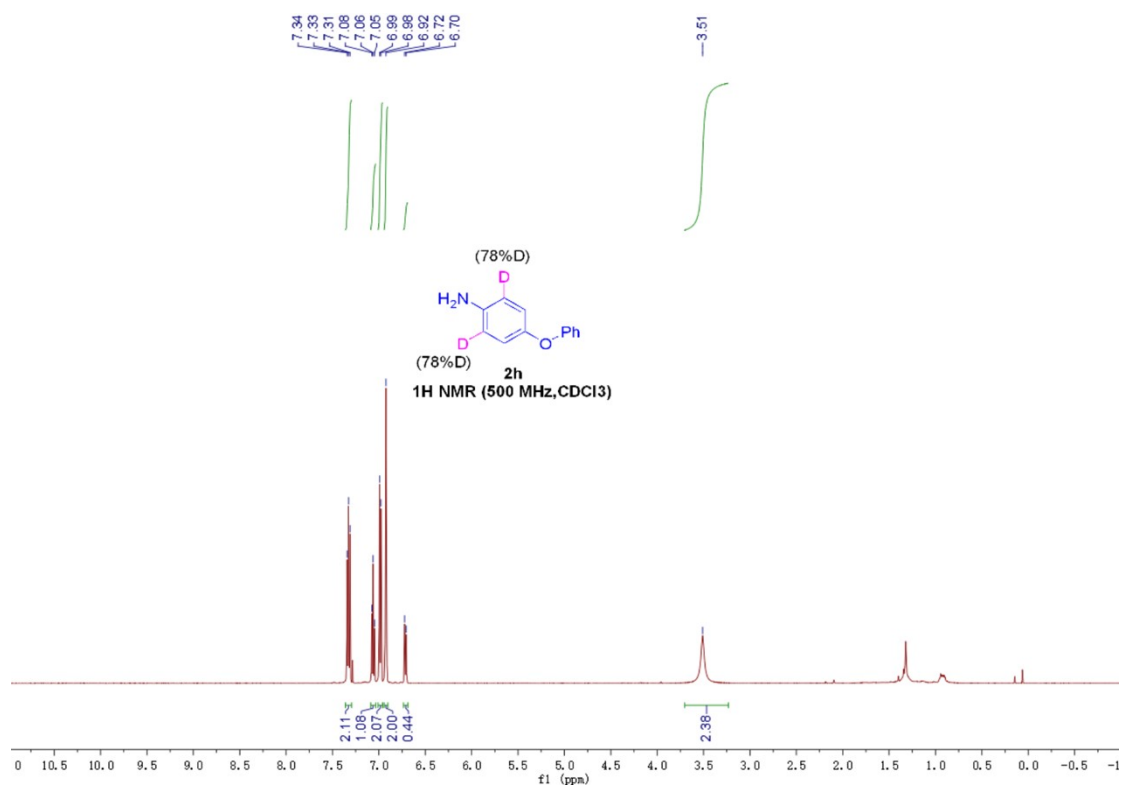

Figure S15. <sup>1</sup>H NMR (500 MHz, CDCl<sub>3</sub>) spectrum of **2h**

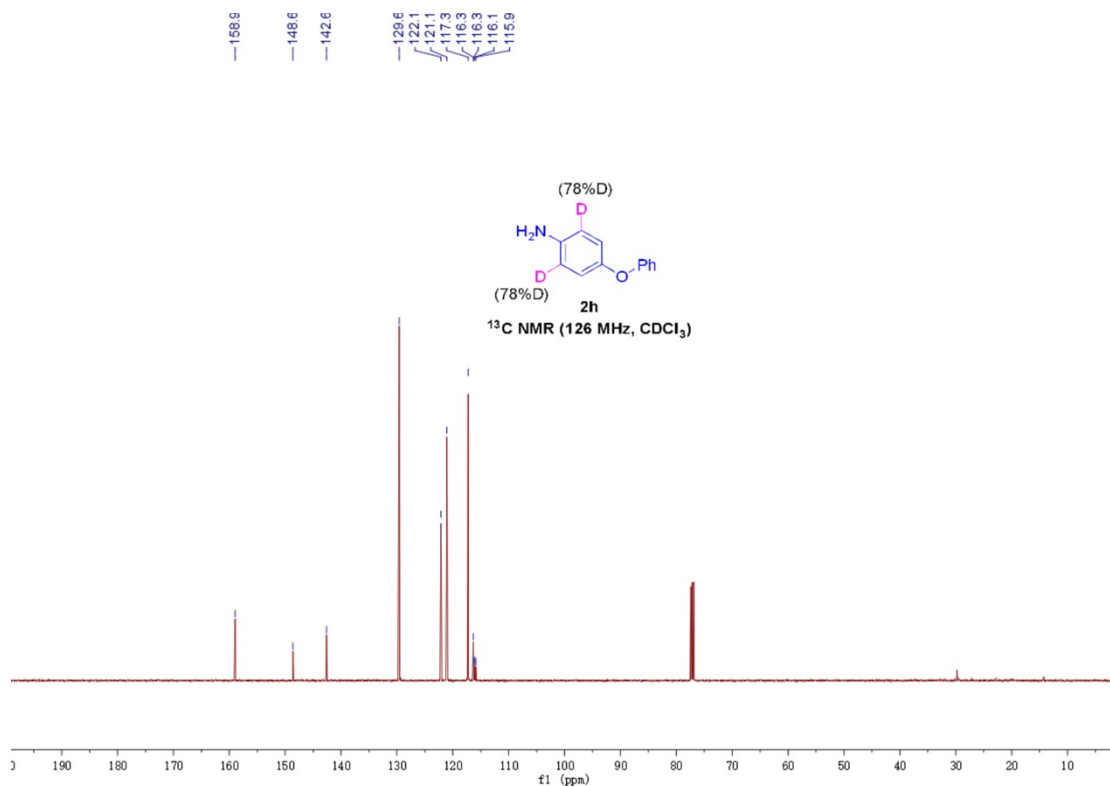

Figure S16. <sup>13</sup>C NMR (126 MHz, CDCl<sub>3</sub>) spectrum of **2h**

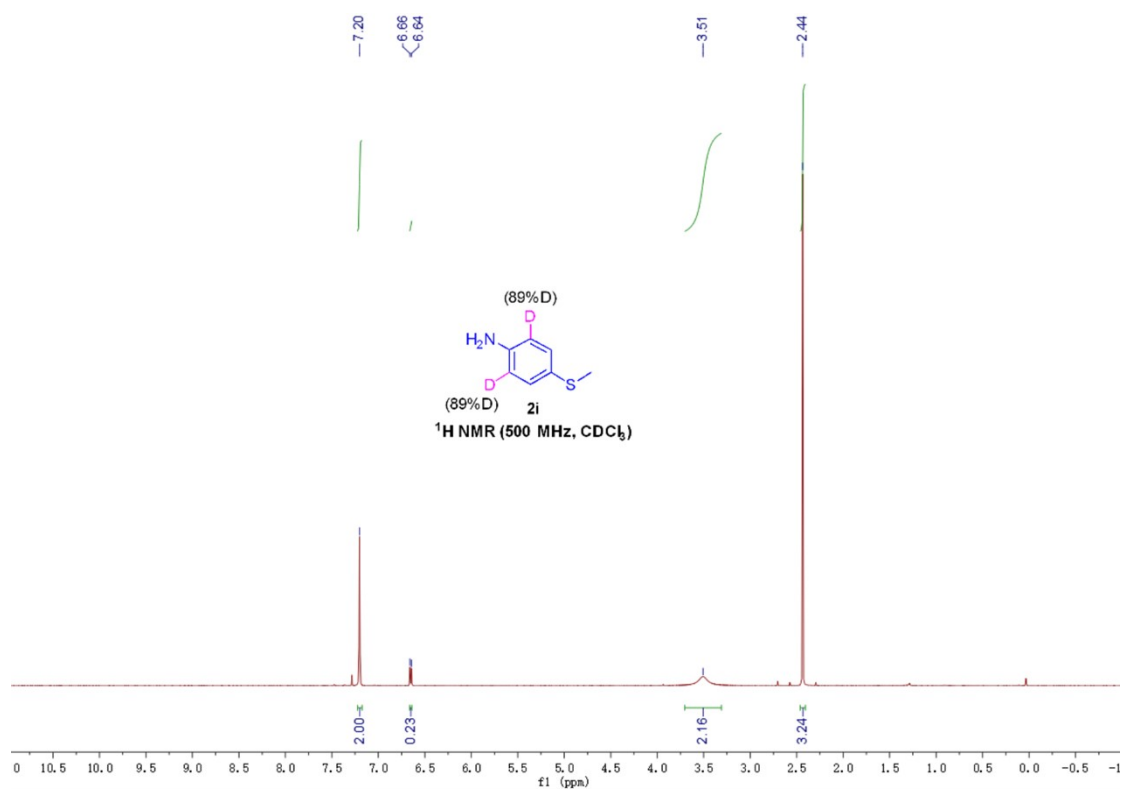

Figure S17. <sup>1</sup>H NMR (500 MHz, CDCl<sub>3</sub>) spectrum of **2i**

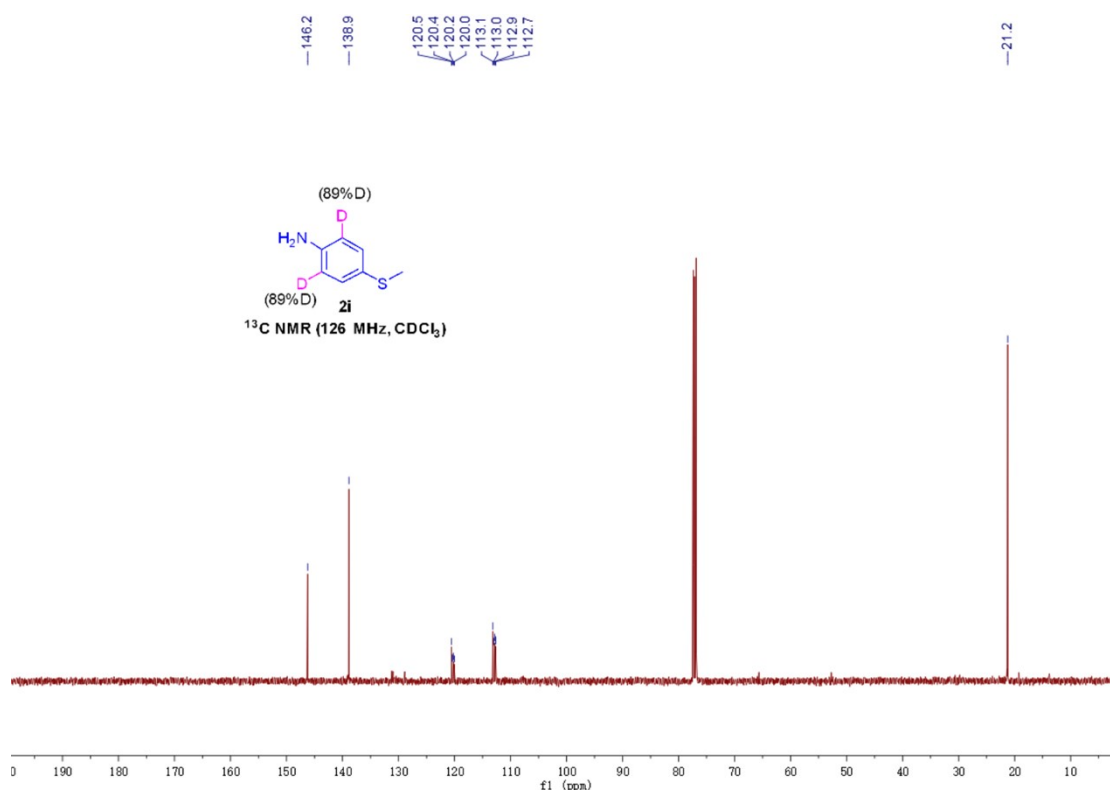

Figure S18. <sup>13</sup>C NMR (126 MHz, CDCl<sub>3</sub>) spectrum of **2i**

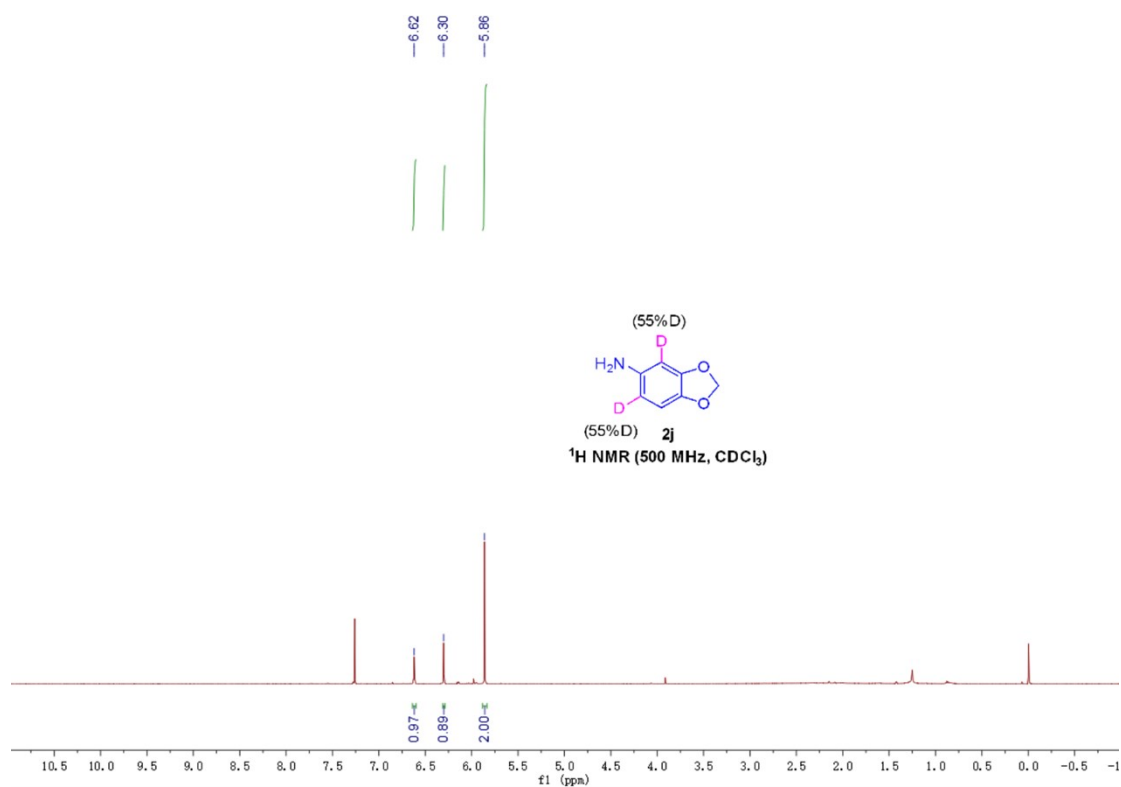

Figure S19. <sup>1</sup>H NMR (500 MHz, CDCl<sub>3</sub>) spectrum of **2j**

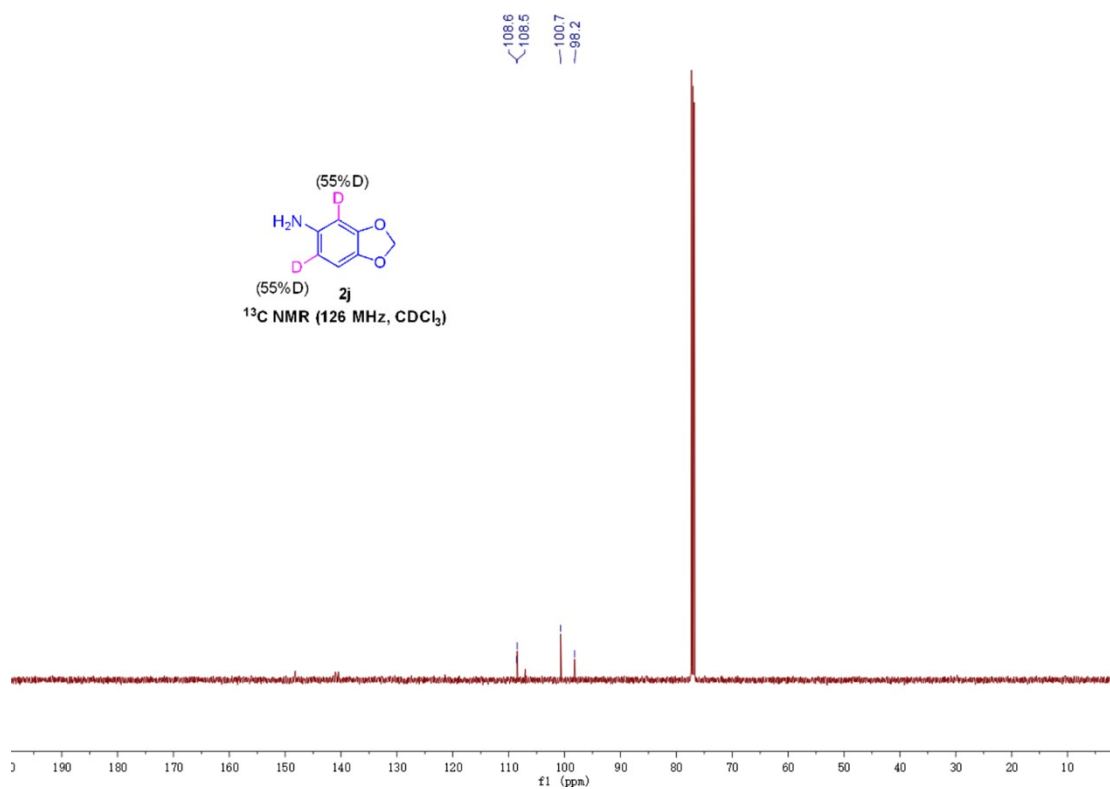

Figure S20. <sup>13</sup>C NMR (126 MHz, CDCl<sub>3</sub>) spectrum of **2j**

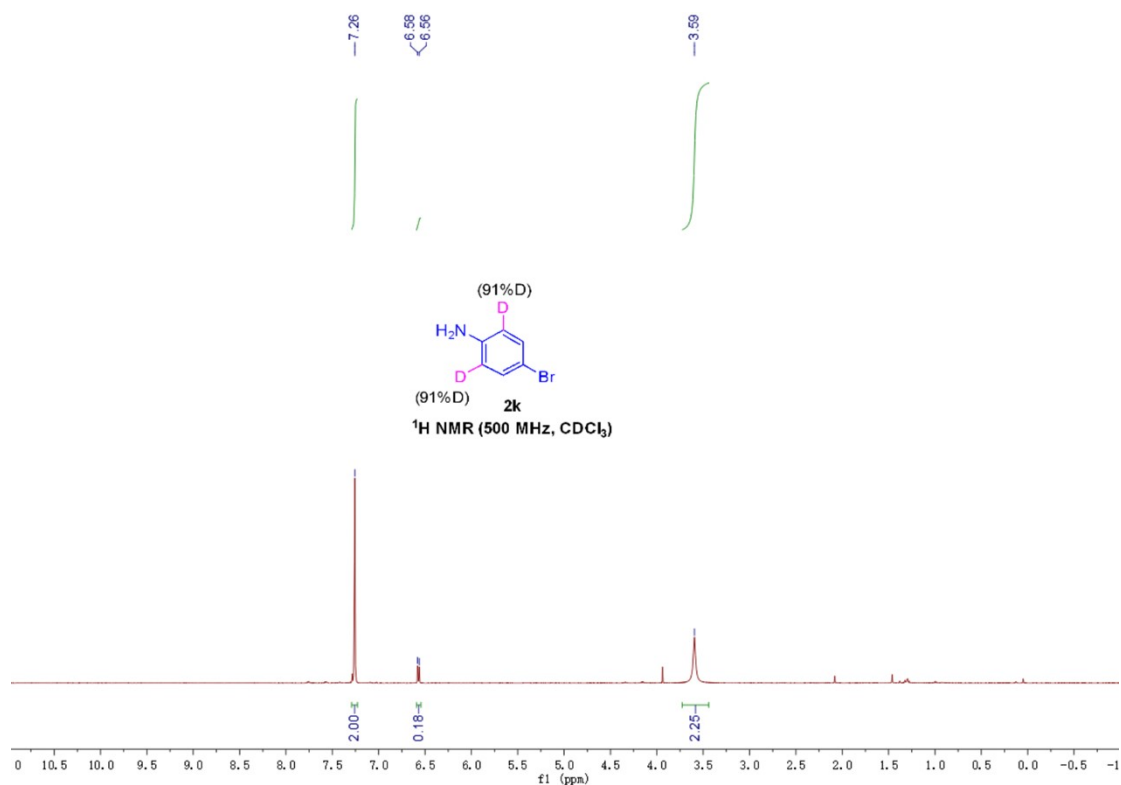

Figure S21. <sup>1</sup>H NMR (500 MHz, CDCl<sub>3</sub>) spectrum of 2k

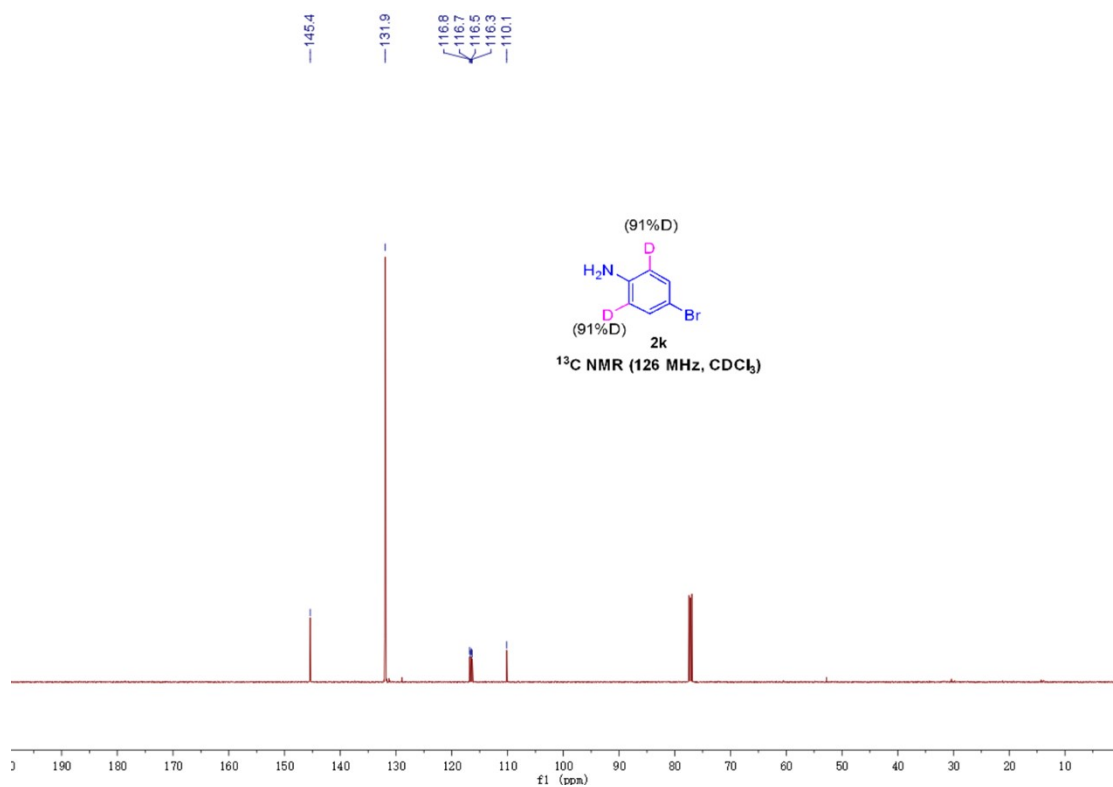

Figure S22. <sup>13</sup>C NMR (126 MHz, CDCl<sub>3</sub>) spectrum of 2k

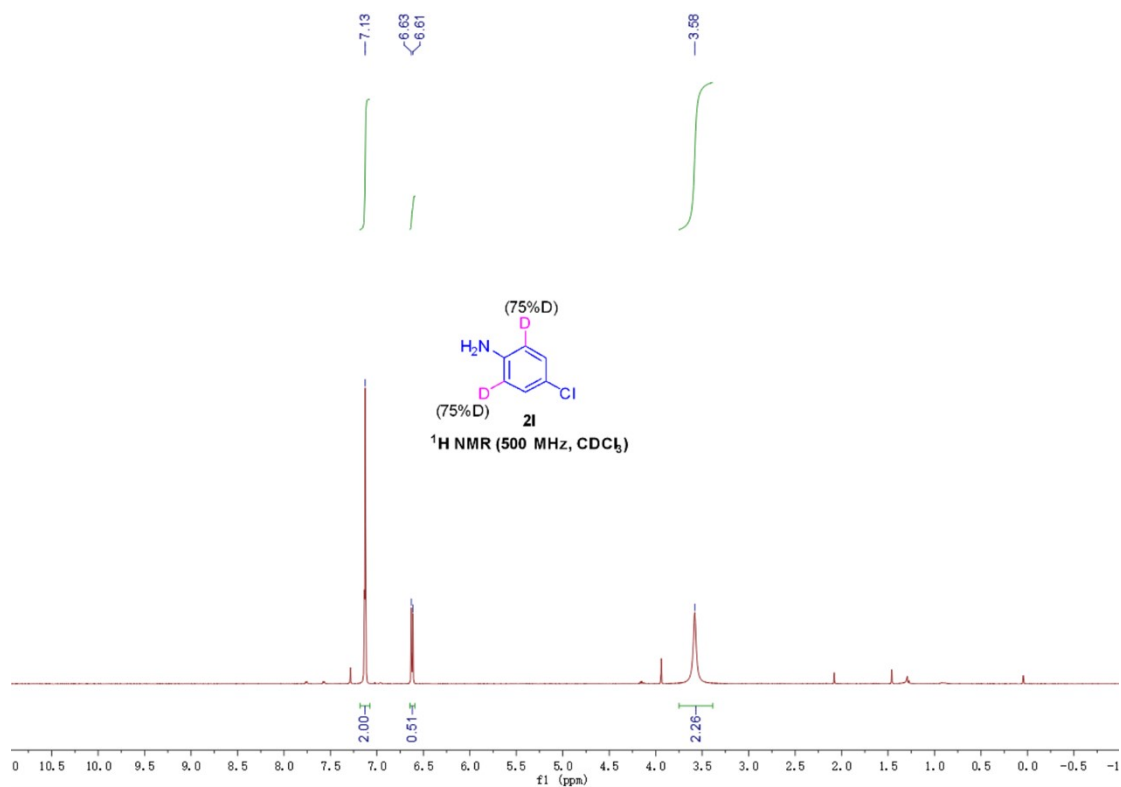

Figure S23.  $^1\text{H}$  NMR (500 MHz,  $\text{CDCl}_3$ ) spectrum of **21**

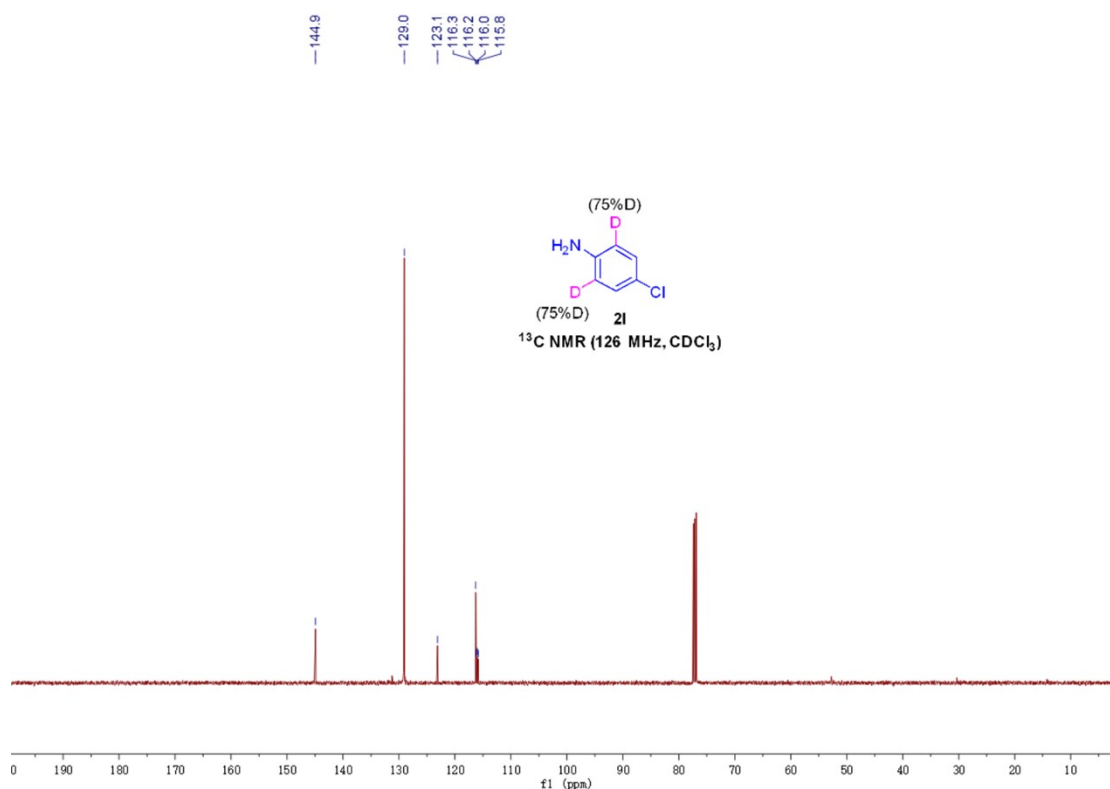

Figure S24.  $^{13}\text{C}$  NMR (126 MHz,  $\text{CDCl}_3$ ) spectrum of **21**

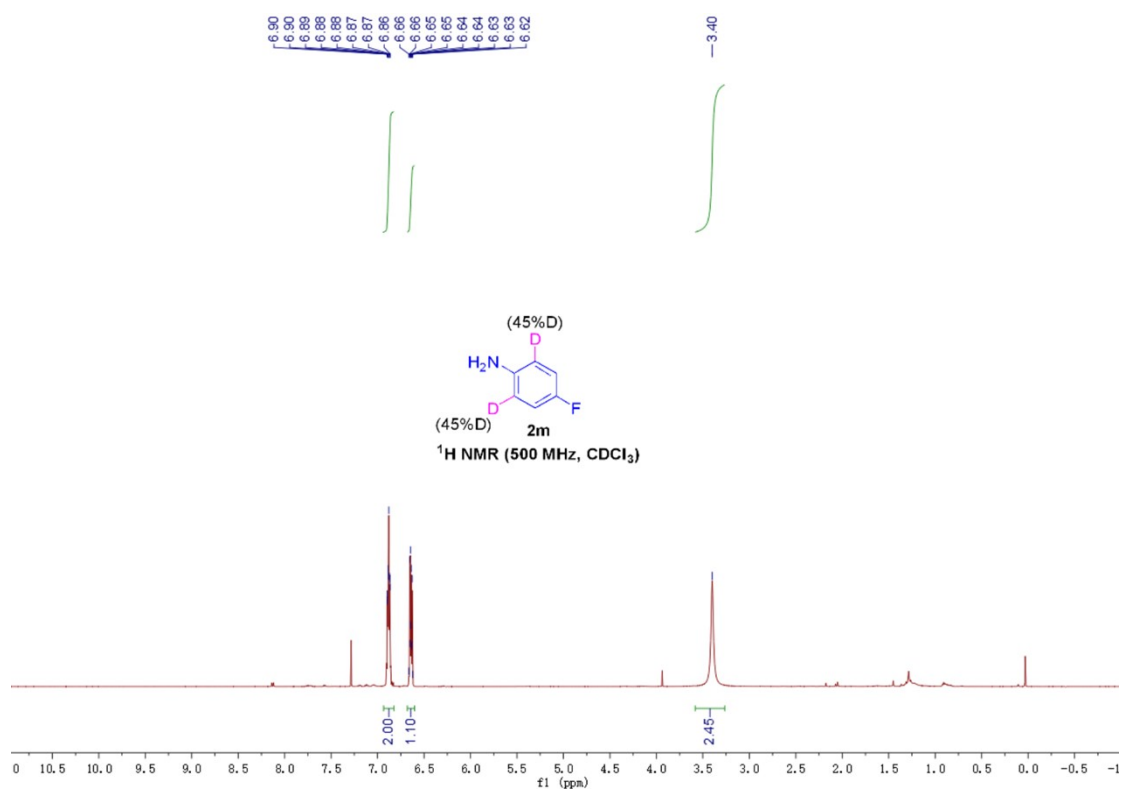

Figure S25. <sup>1</sup>H NMR (500 MHz, CDCl<sub>3</sub>) spectrum of **2m**

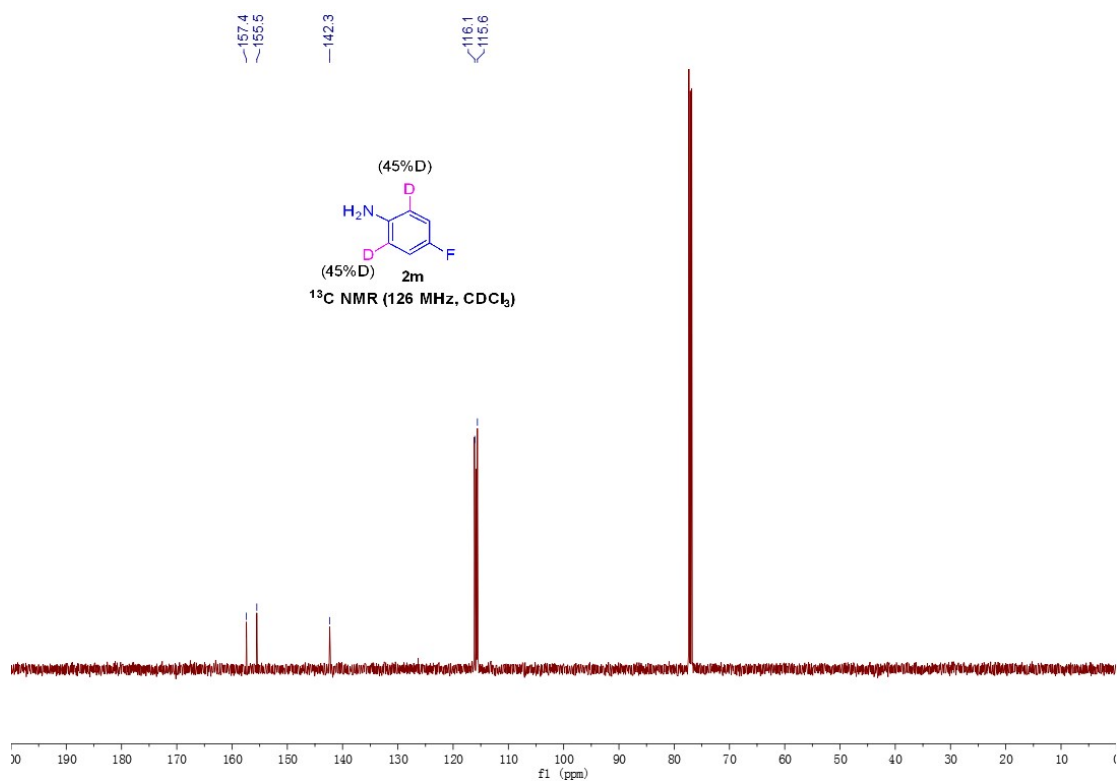

Figure S26. <sup>13</sup>C NMR (126 MHz, CDCl<sub>3</sub>) spectrum of **2m**

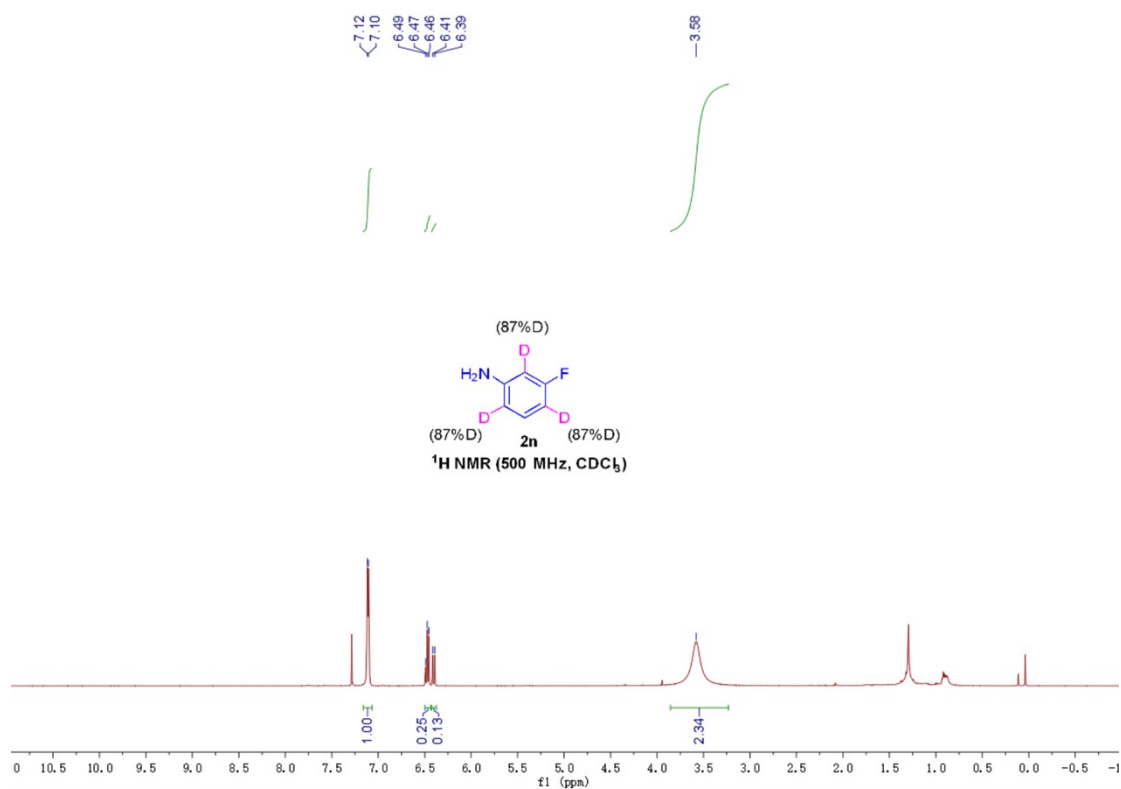

Figure S27. <sup>1</sup>H NMR (500 MHz, CDCl<sub>3</sub>) spectrum of **2n**

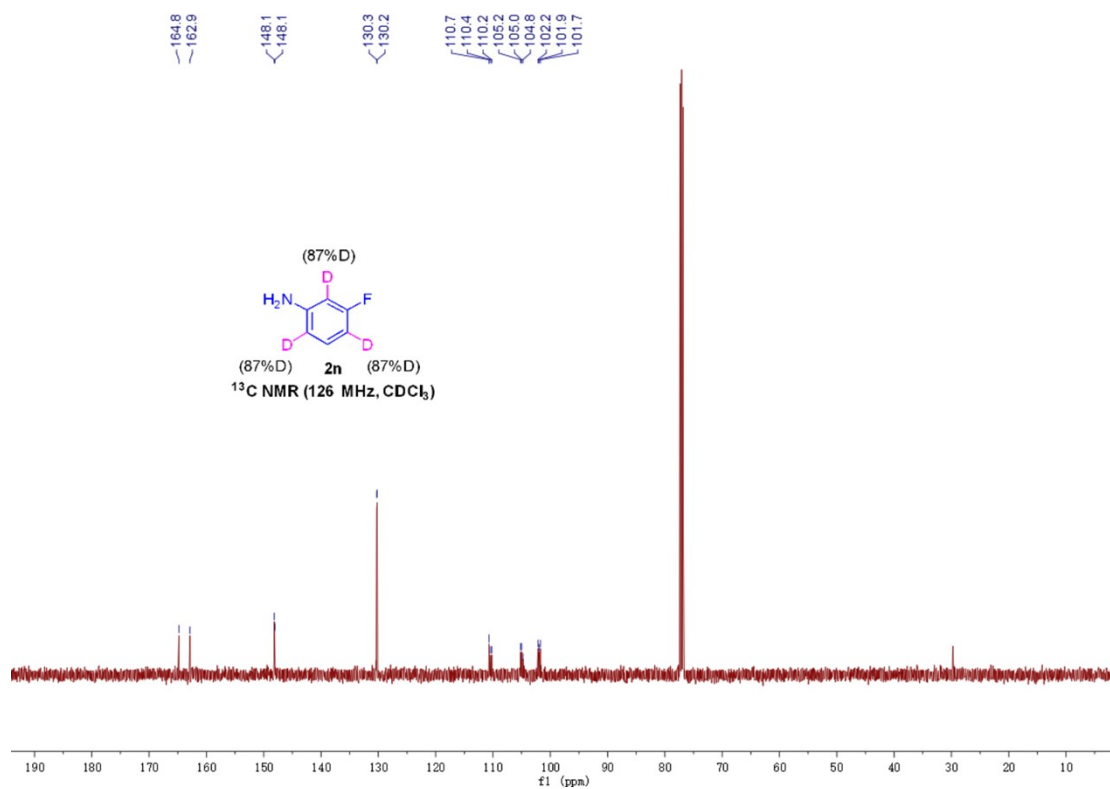

Figure S28. <sup>13</sup>C NMR (126 MHz, CDCl<sub>3</sub>) spectrum of **2n**

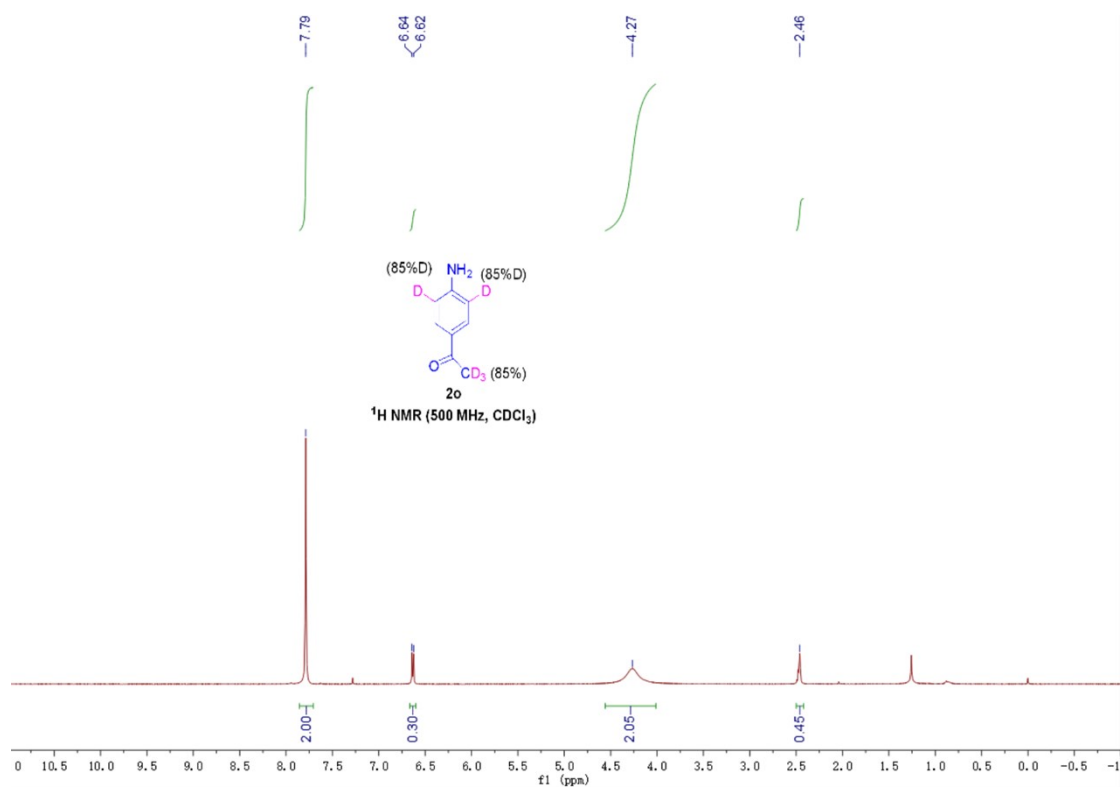

Figure S29. <sup>1</sup>H NMR (500 MHz, CDCl<sub>3</sub>) spectrum of **2o**

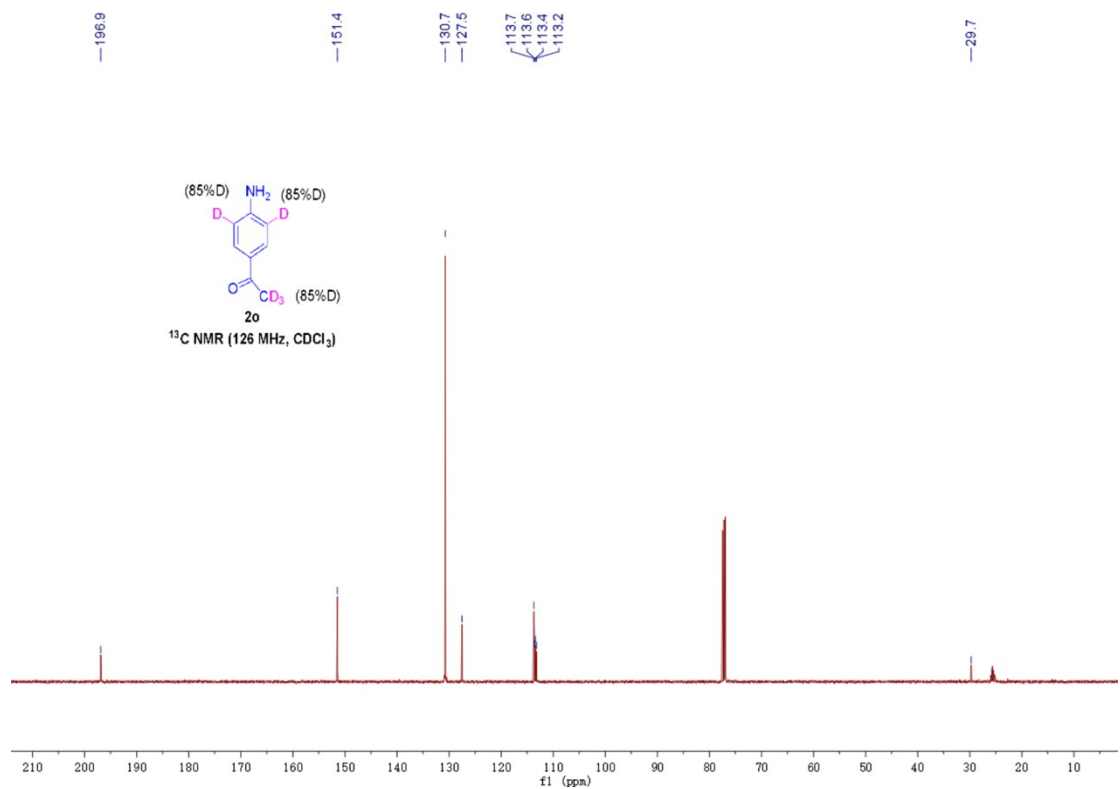

Figure S30. <sup>13</sup>C NMR (126 MHz, CDCl<sub>3</sub>) spectrum of **2o**

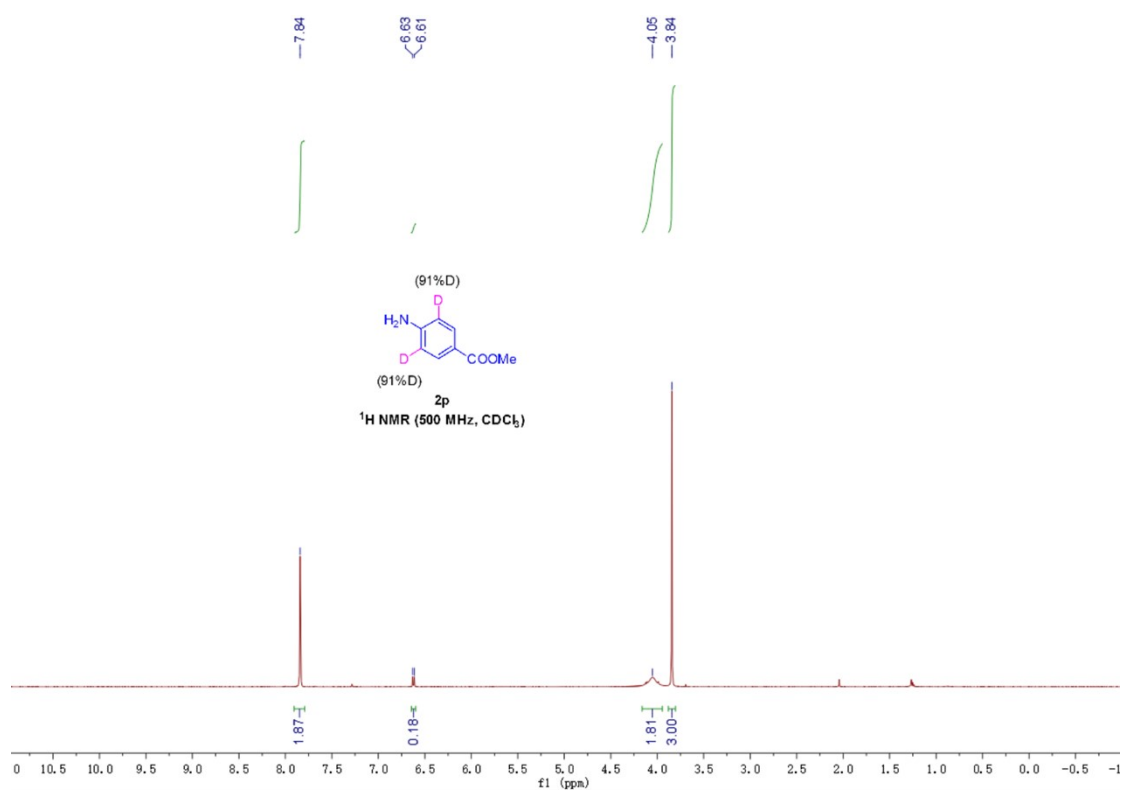

Figure S31. <sup>1</sup>H NMR (500 MHz, CDCl<sub>3</sub>) spectrum of 2p

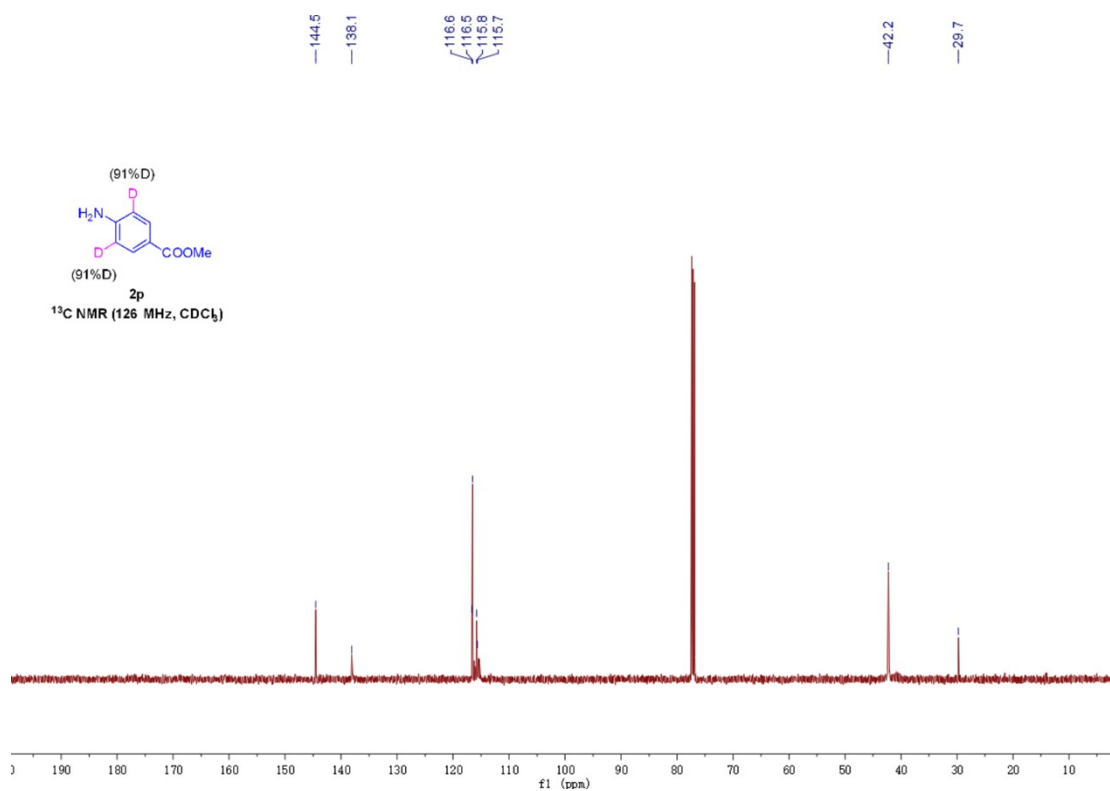

Figure S32. <sup>13</sup>C NMR (126 MHz, CDCl<sub>3</sub>) spectrum of 2p

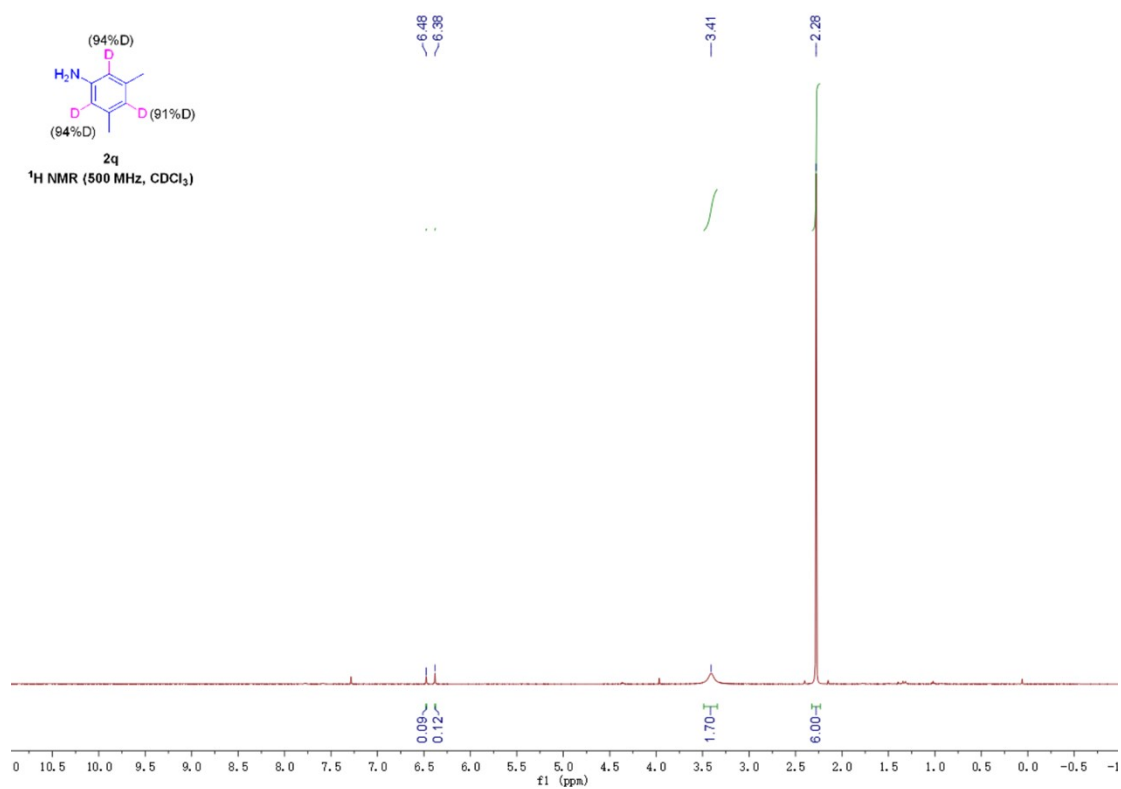

Figure S33. <sup>1</sup>H NMR (500 MHz, CDCl<sub>3</sub>) spectrum of 2q

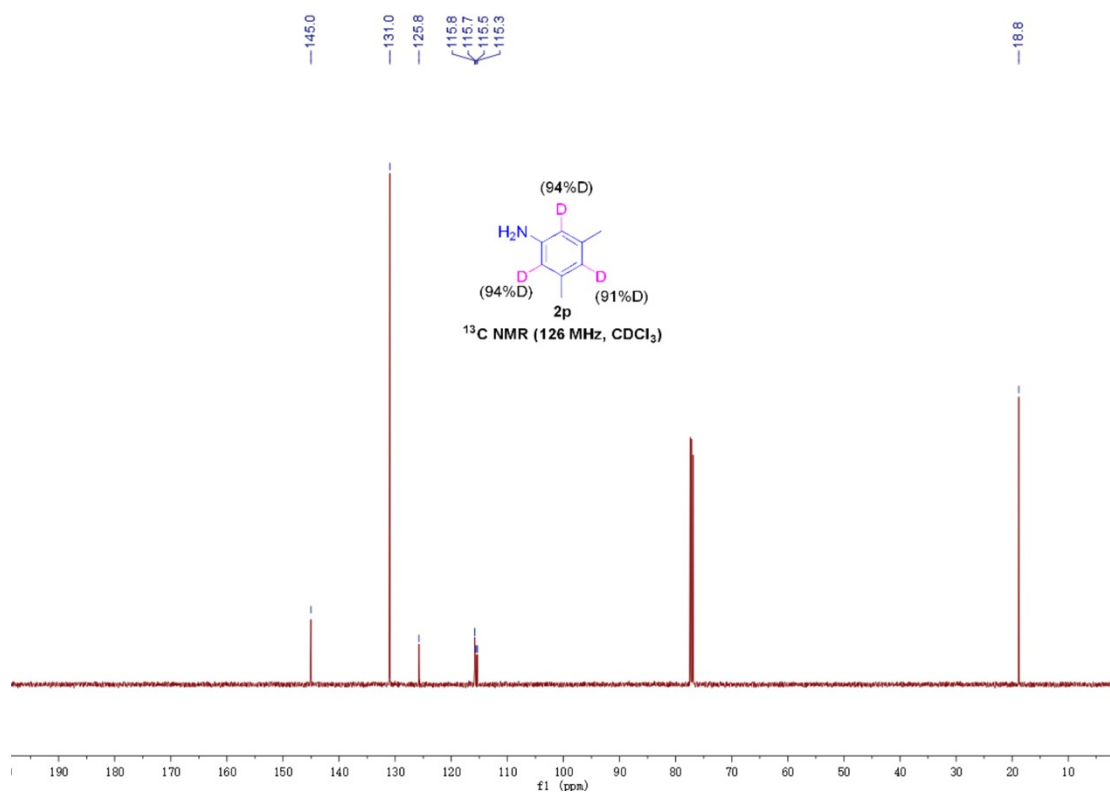

Figure S34. <sup>13</sup>C NMR (126 MHz, CDCl<sub>3</sub>) spectrum of 2q

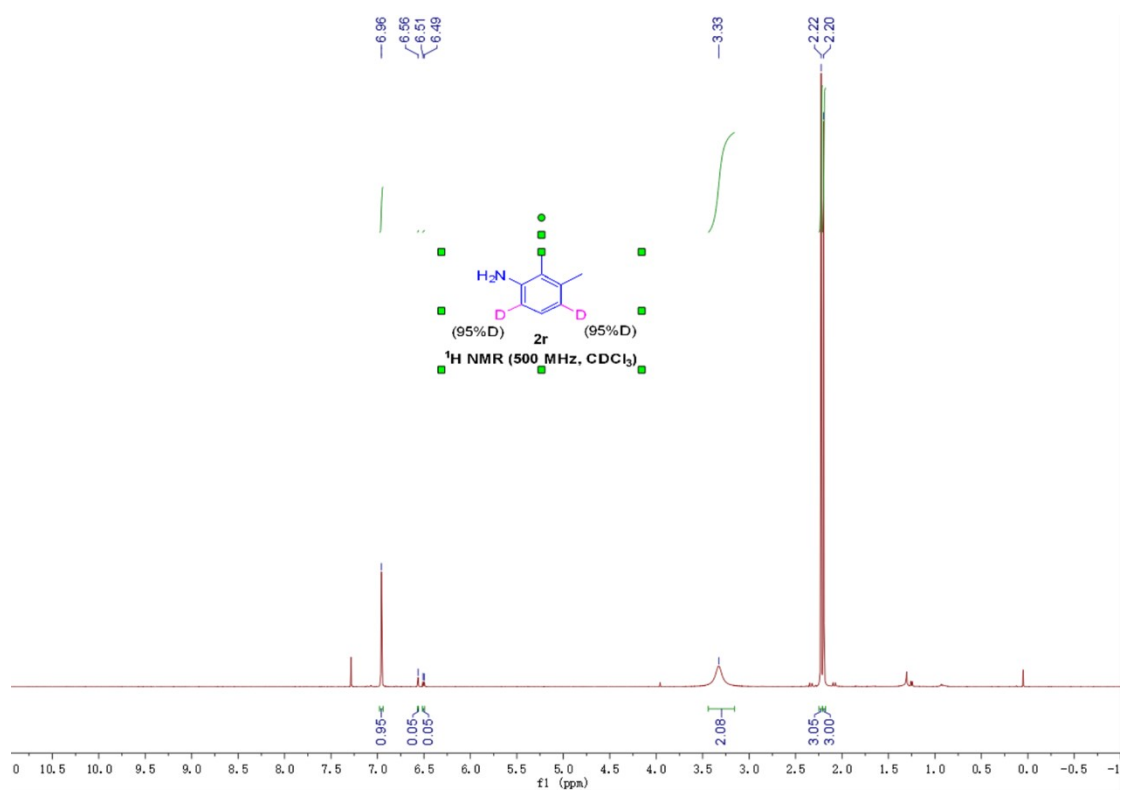

Figure S35. <sup>1</sup>H NMR (500 MHz, CDCl<sub>3</sub>) spectrum of 2r

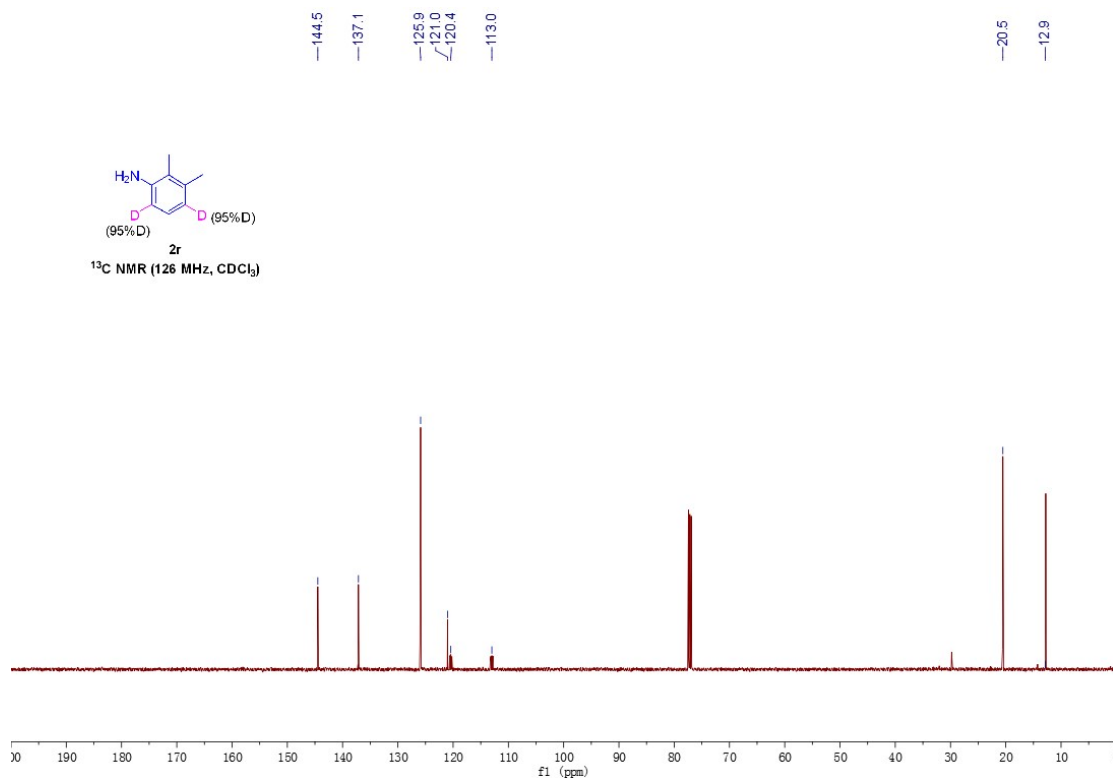

Figure S36. <sup>13</sup>C NMR (126 MHz, CDCl<sub>3</sub>) spectrum of 2r

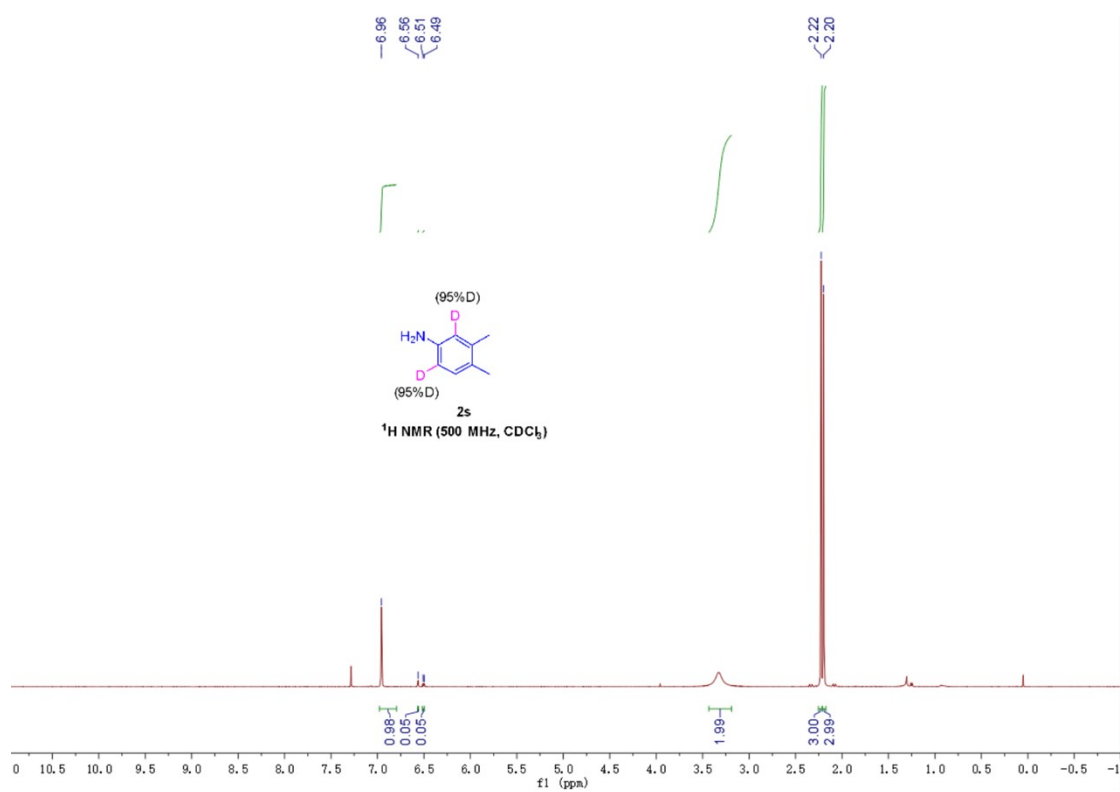

Figure S37.  $^1\text{H}$  NMR (500 MHz,  $\text{CDCl}_3$ ) spectrum of **2s**

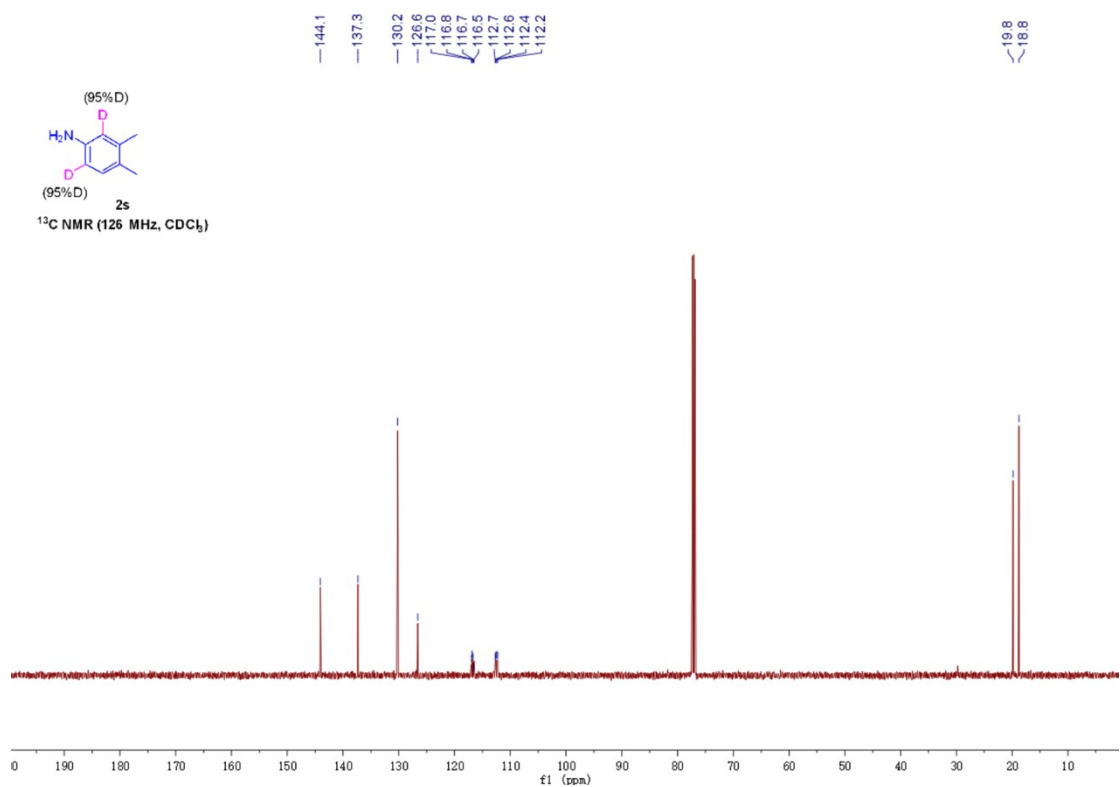

Figure S38.  $^{13}\text{C}$  NMR (126 MHz,  $\text{CDCl}_3$ ) spectrum of **2s**

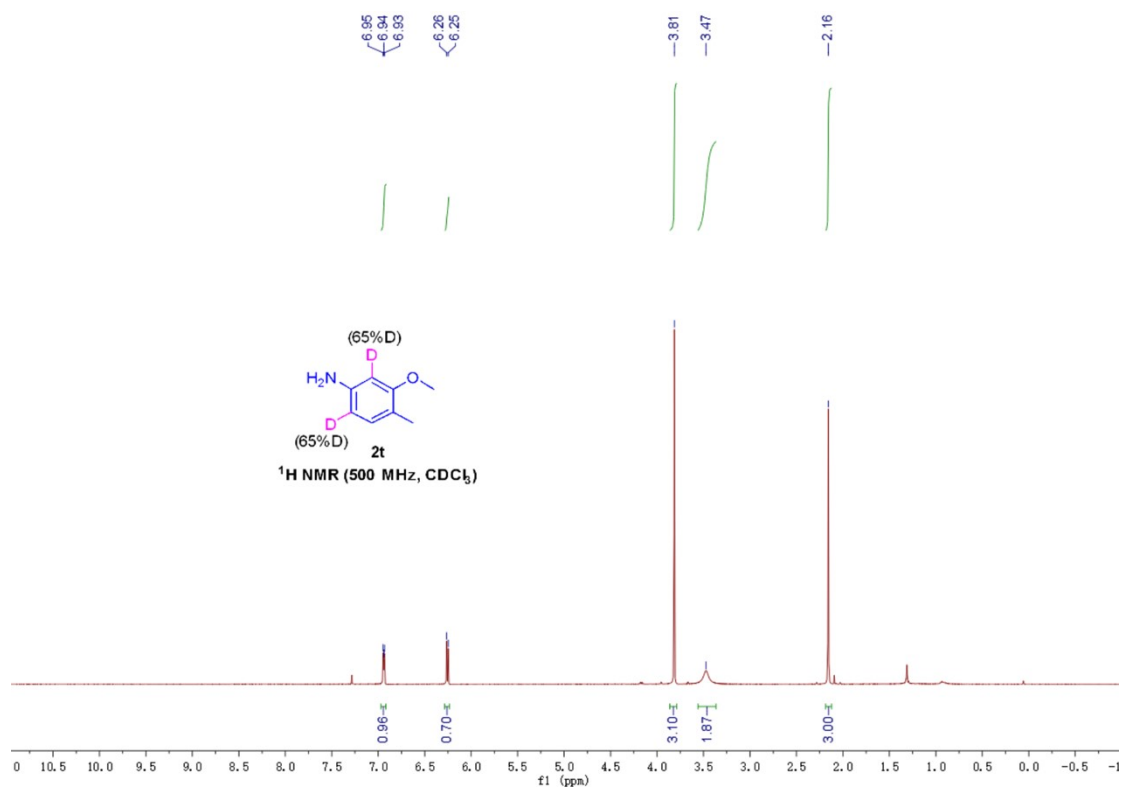

Figure S39. <sup>1</sup>H NMR (500 MHz, CDCl<sub>3</sub>) spectrum of **2t**

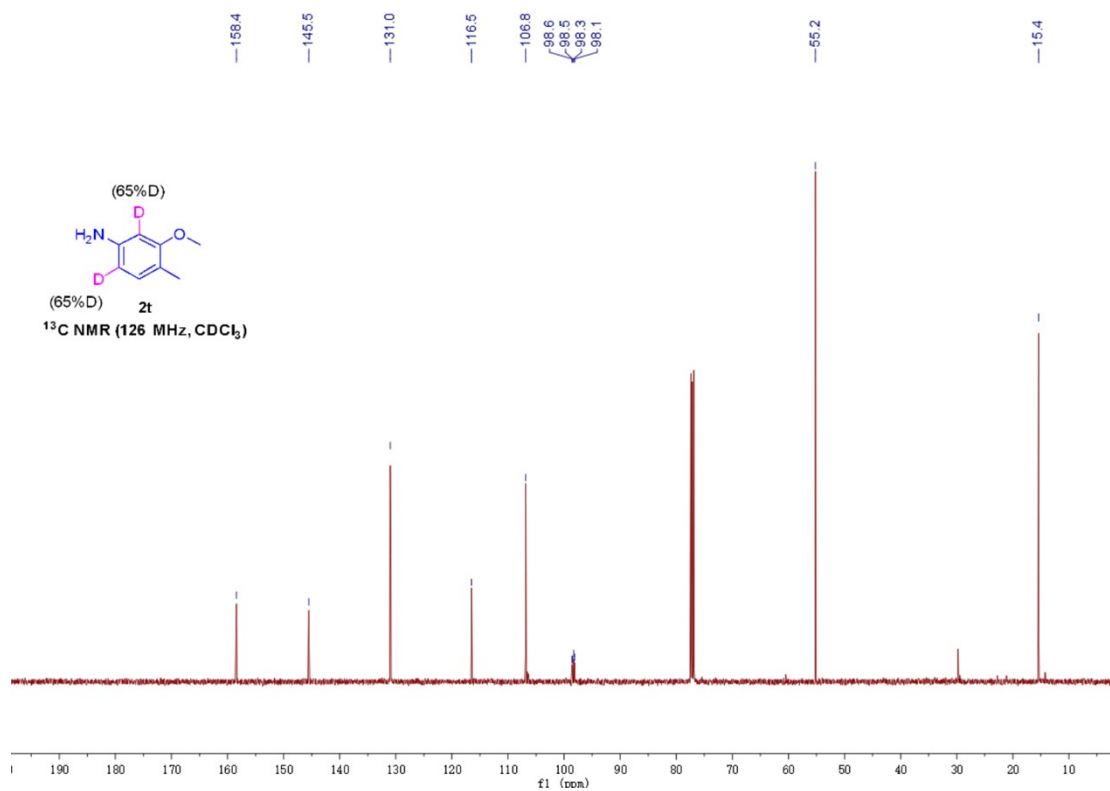

Figure S40. <sup>13</sup>C NMR (126 MHz, CDCl<sub>3</sub>) spectrum of **2t**

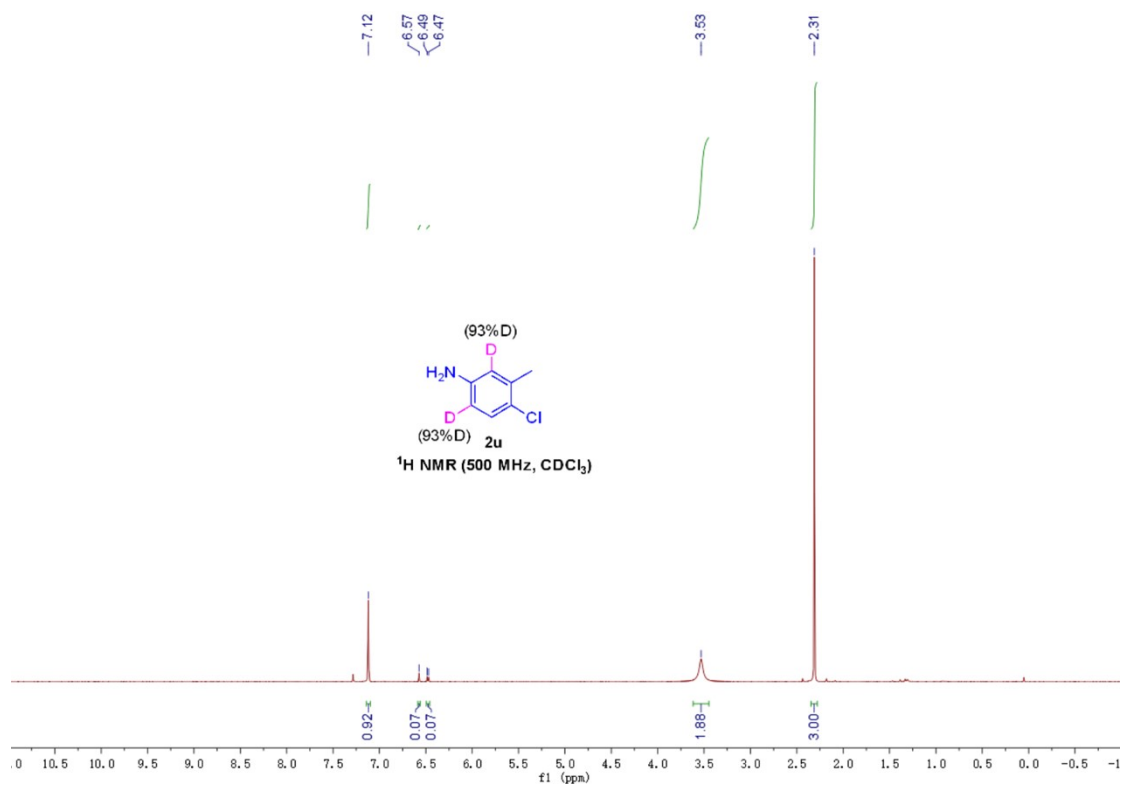

Figure S41. <sup>1</sup>H NMR (500 MHz, CDCl<sub>3</sub>) spectrum of **2u**

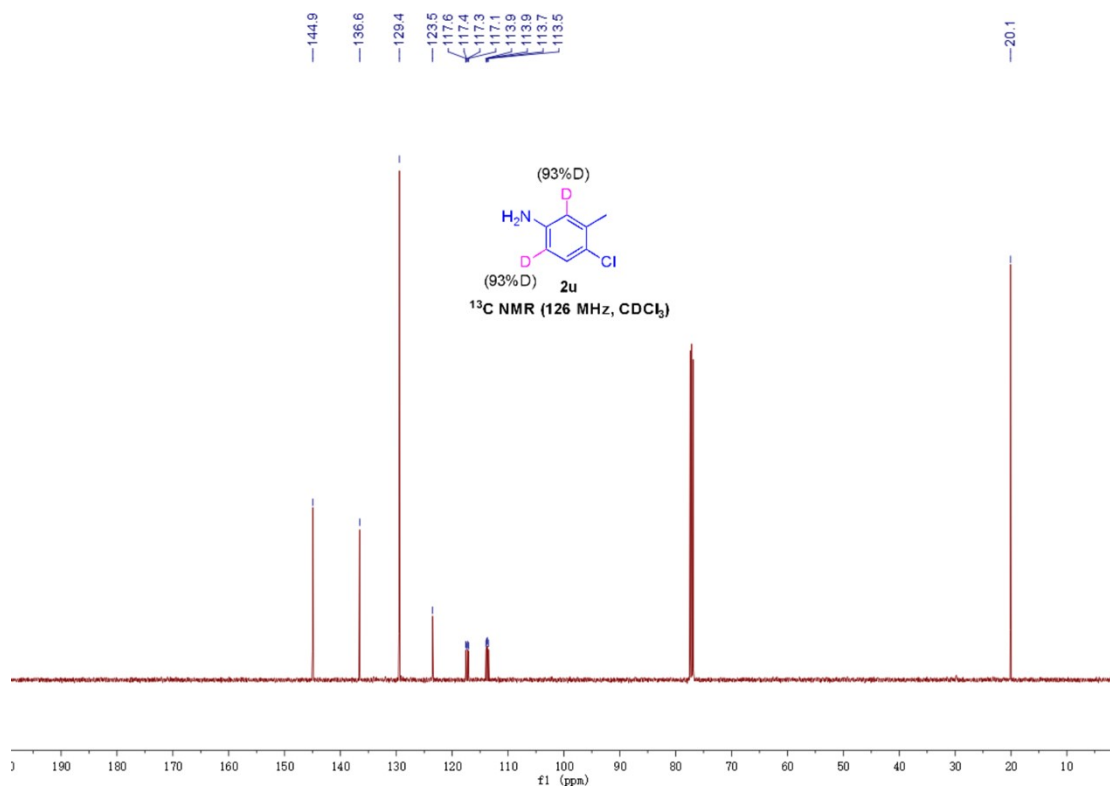

Figure S42. <sup>13</sup>C NMR (126 MHz, CDCl<sub>3</sub>) spectrum of **2u**

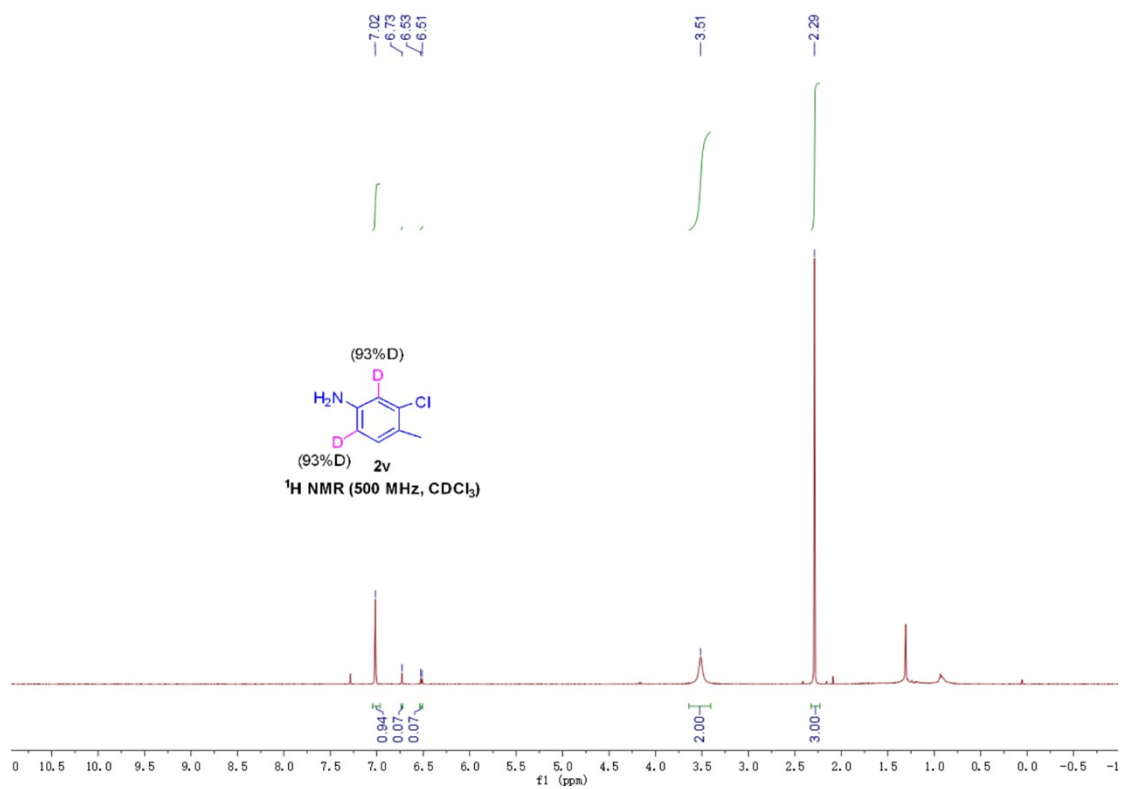

Figure S43. <sup>1</sup>H NMR (500 MHz, CDCl<sub>3</sub>) spectrum of **2v**

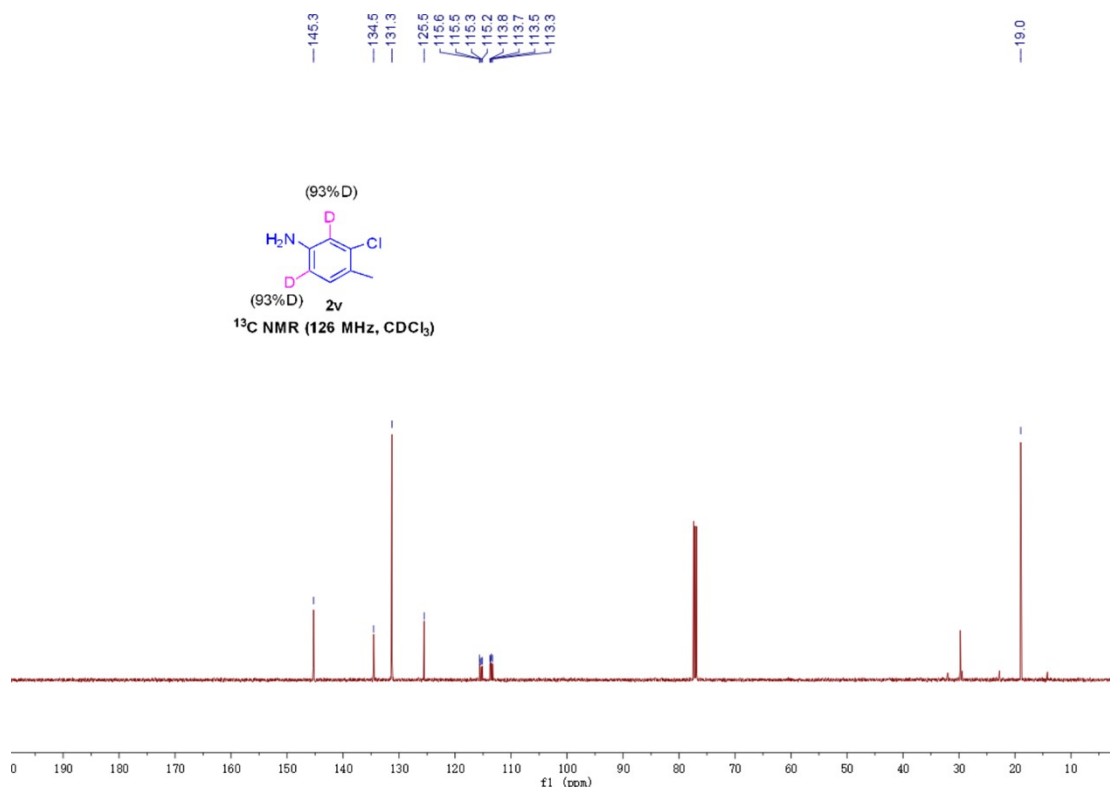

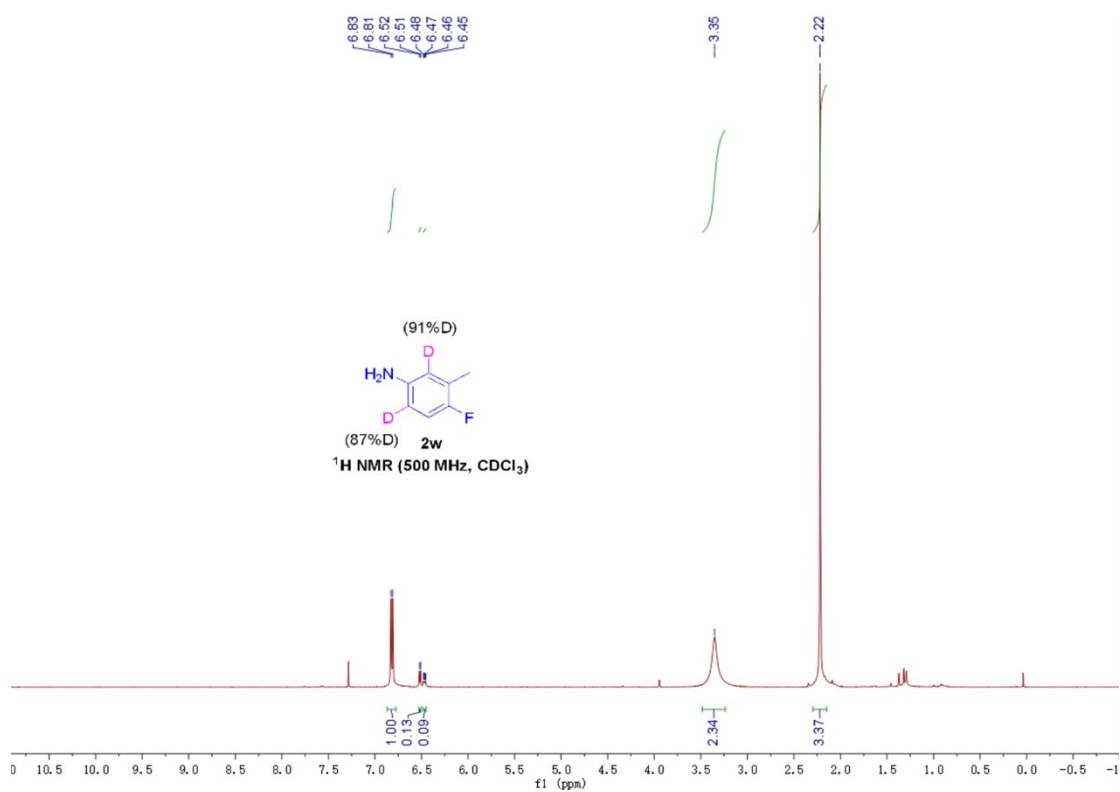

Figure S45. <sup>1</sup>H NMR (500 MHz, CDCl<sub>3</sub>) spectrum of 2w

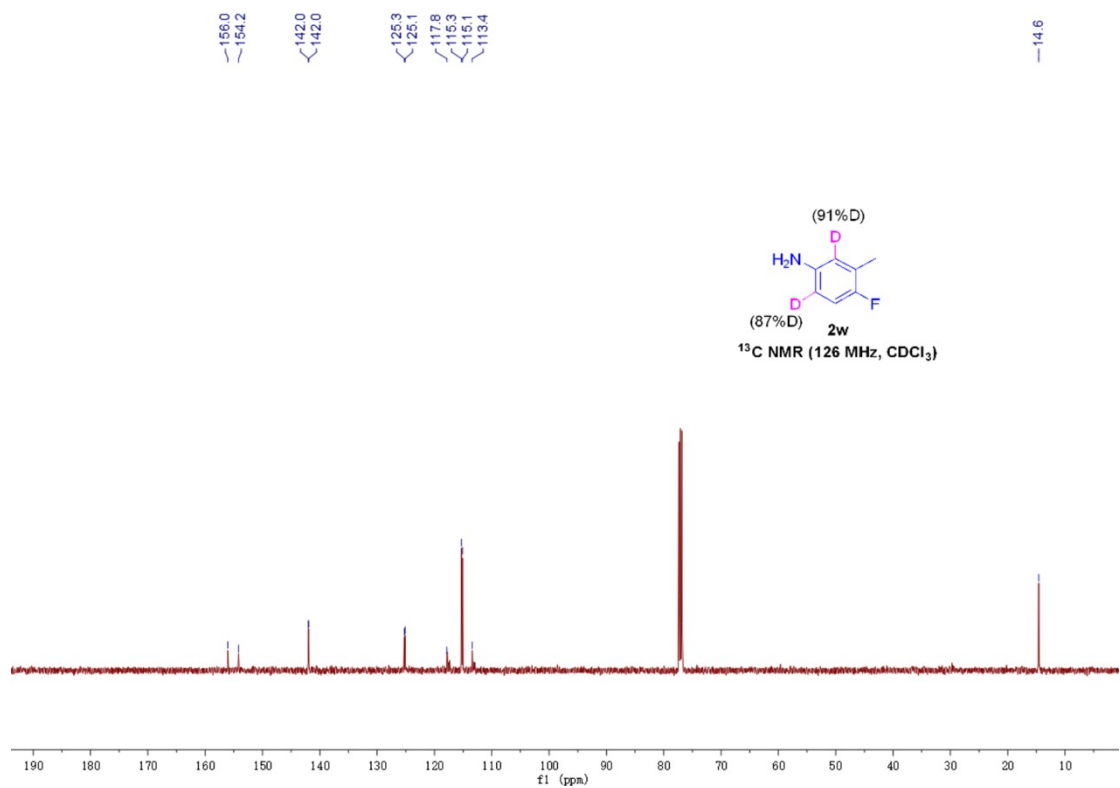

Figure S46. <sup>13</sup>C NMR (126 MHz, CDCl<sub>3</sub>) spectrum of 2w

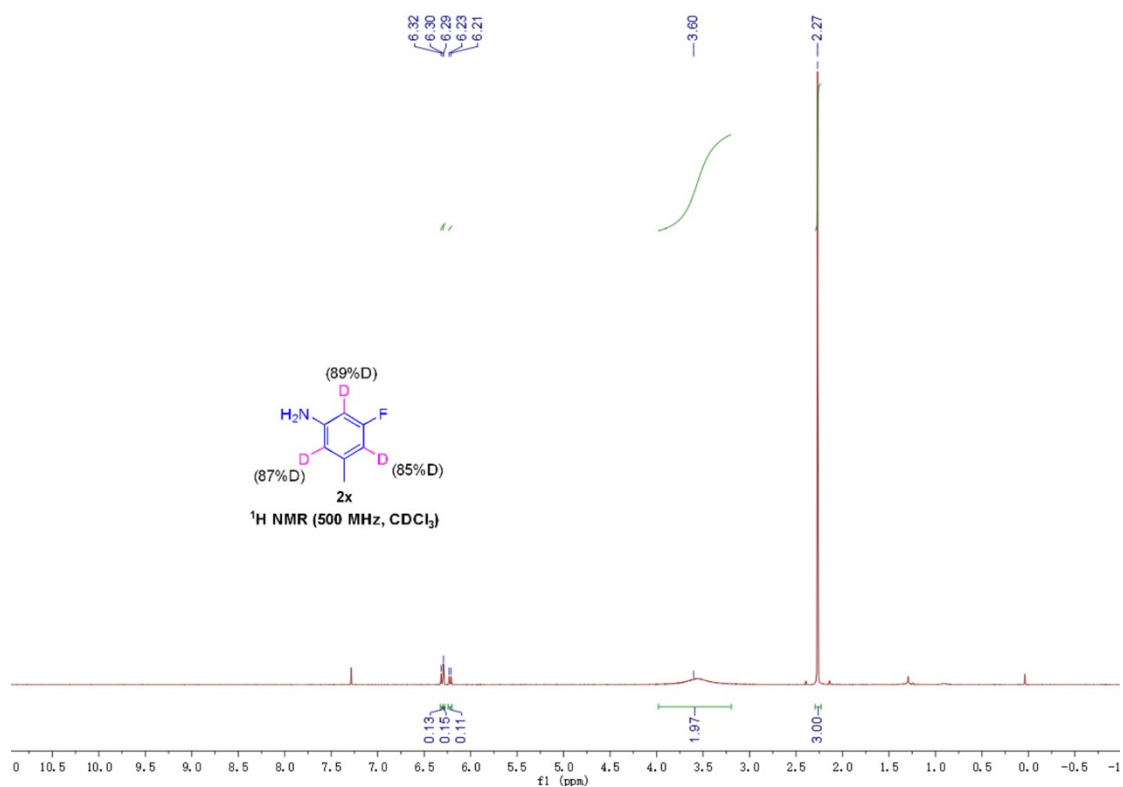

Figure S47. <sup>1</sup>H NMR (500 MHz, CDCl<sub>3</sub>) spectrum of **2x**

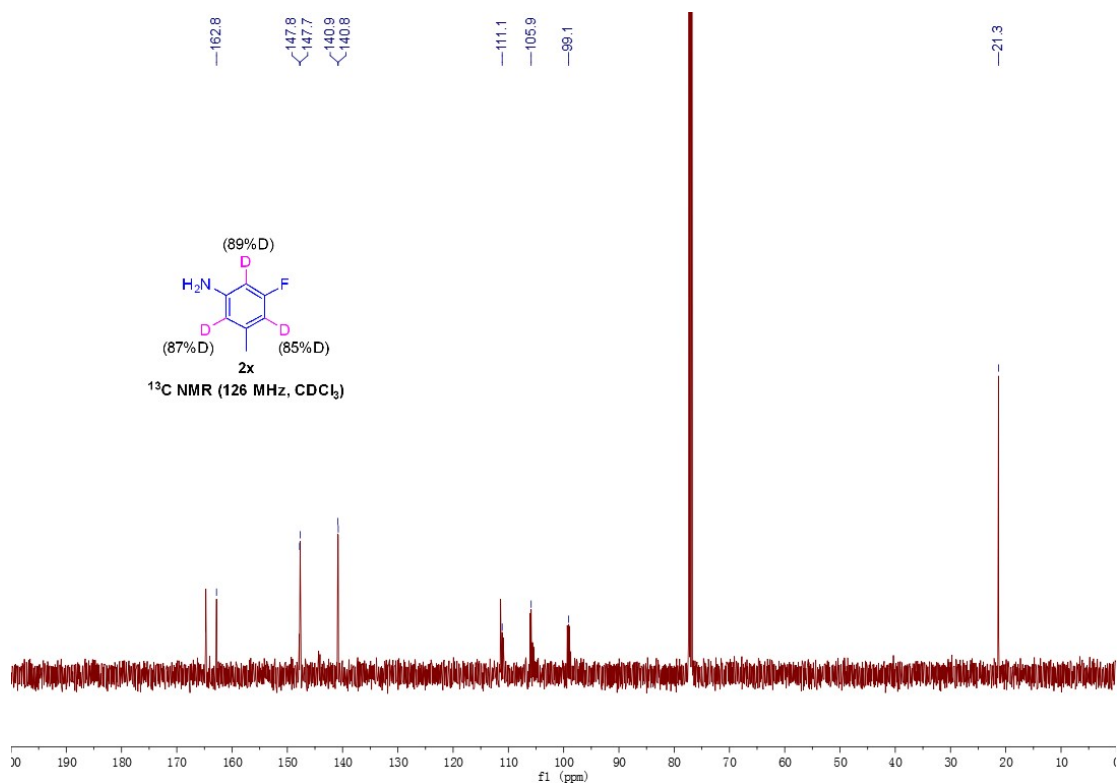

Figure S48. <sup>13</sup>C NMR (126 MHz, CDCl<sub>3</sub>) spectrum of **2x**

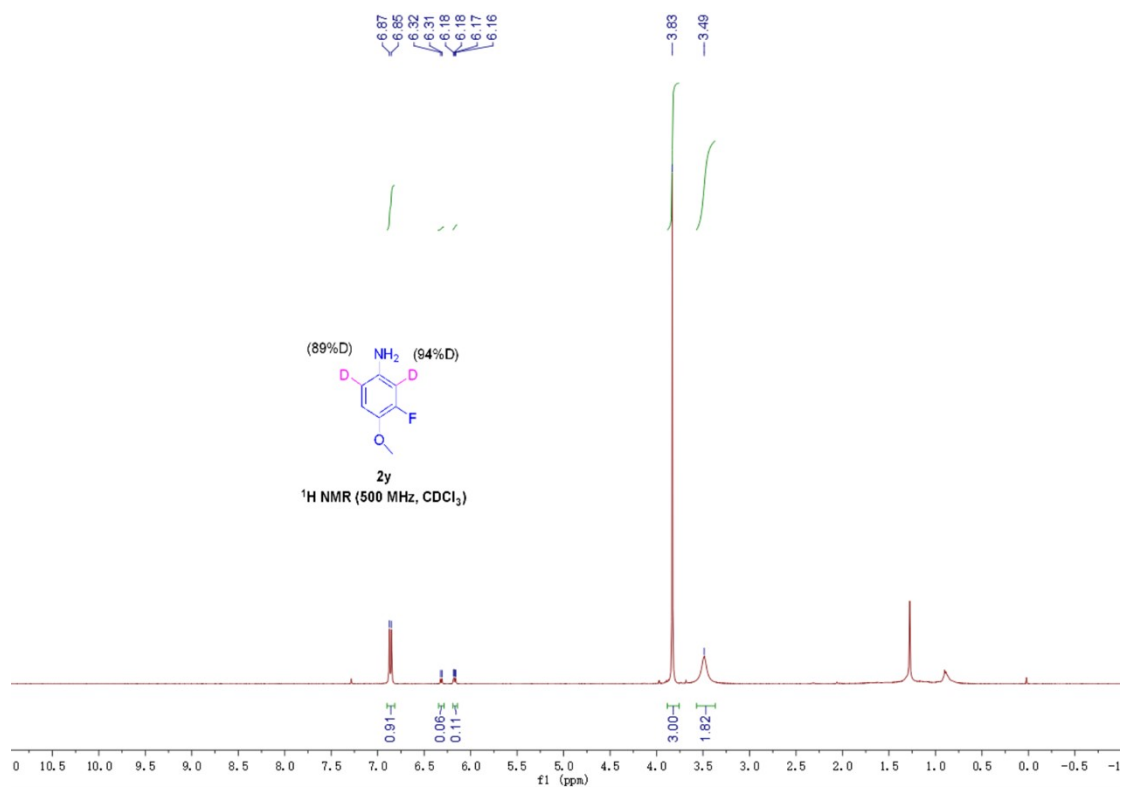

Figure S49. <sup>1</sup>H NMR (500 MHz, CDCl<sub>3</sub>) spectrum of **2y**

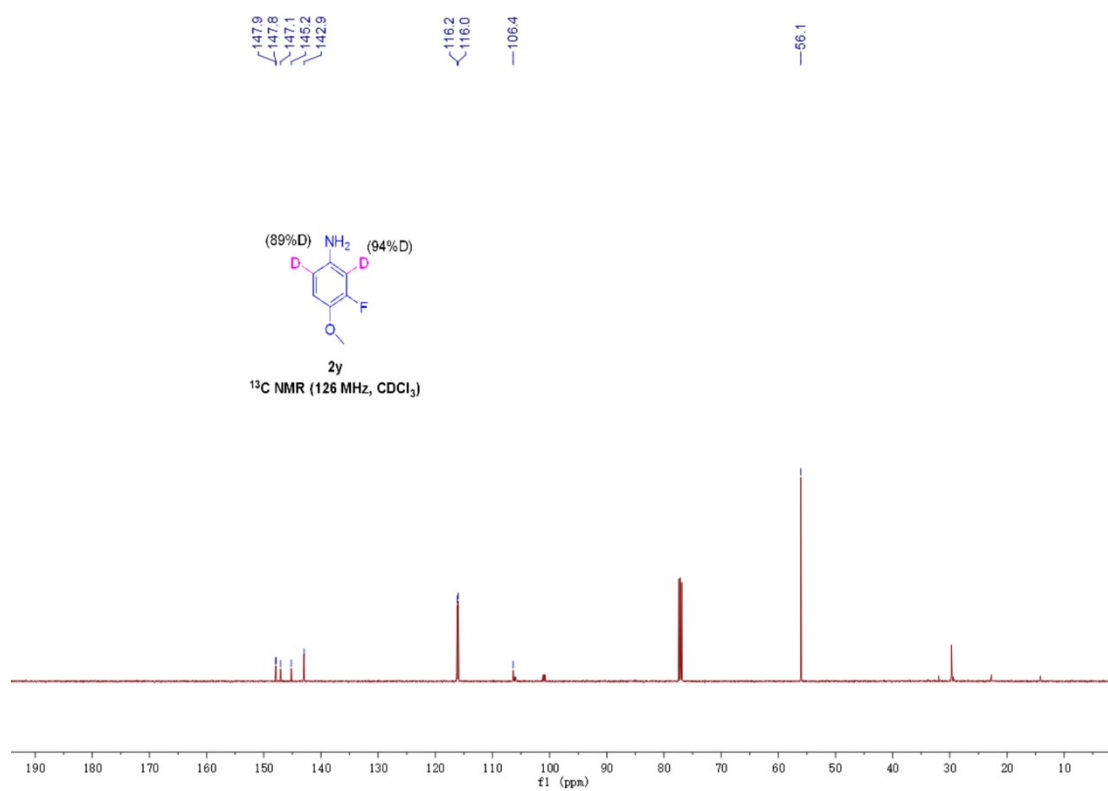

Figure S50. <sup>13</sup>C NMR (126 MHz, CDCl<sub>3</sub>) spectrum of **2y**

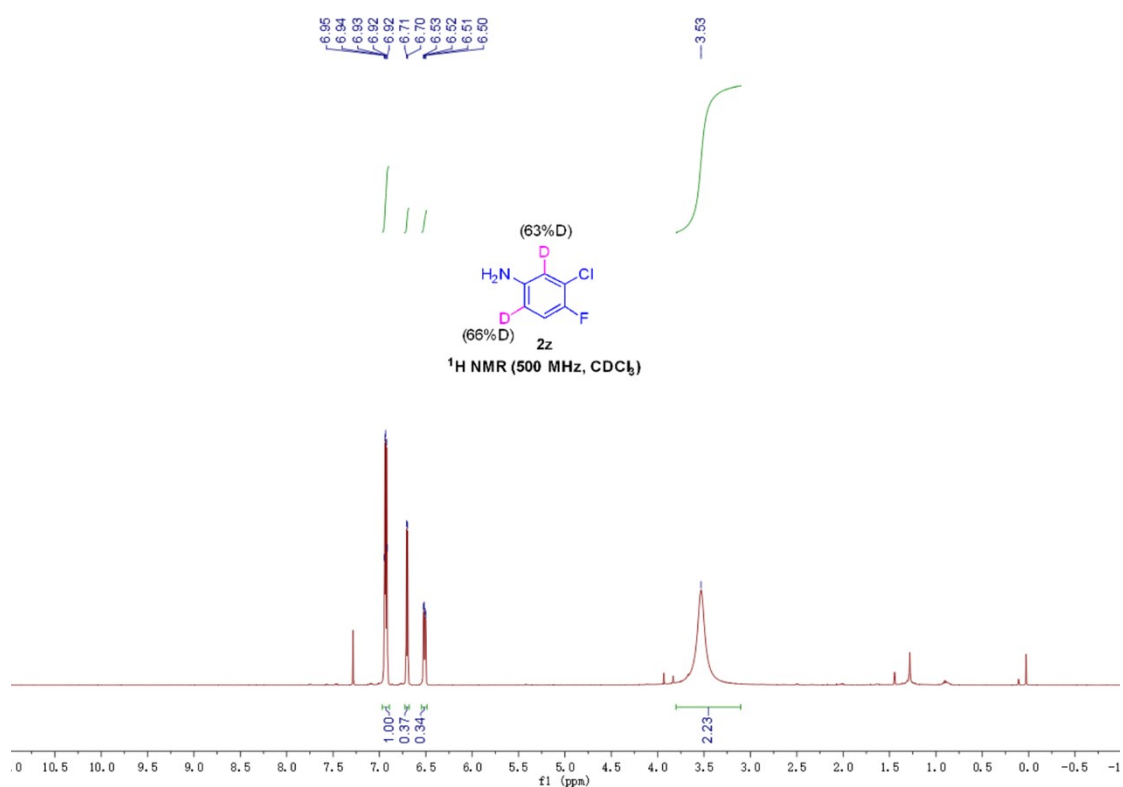

**Figure S51.** <sup>1</sup>H NMR (500 MHz, CDCl<sub>3</sub>) spectrum of **2z**

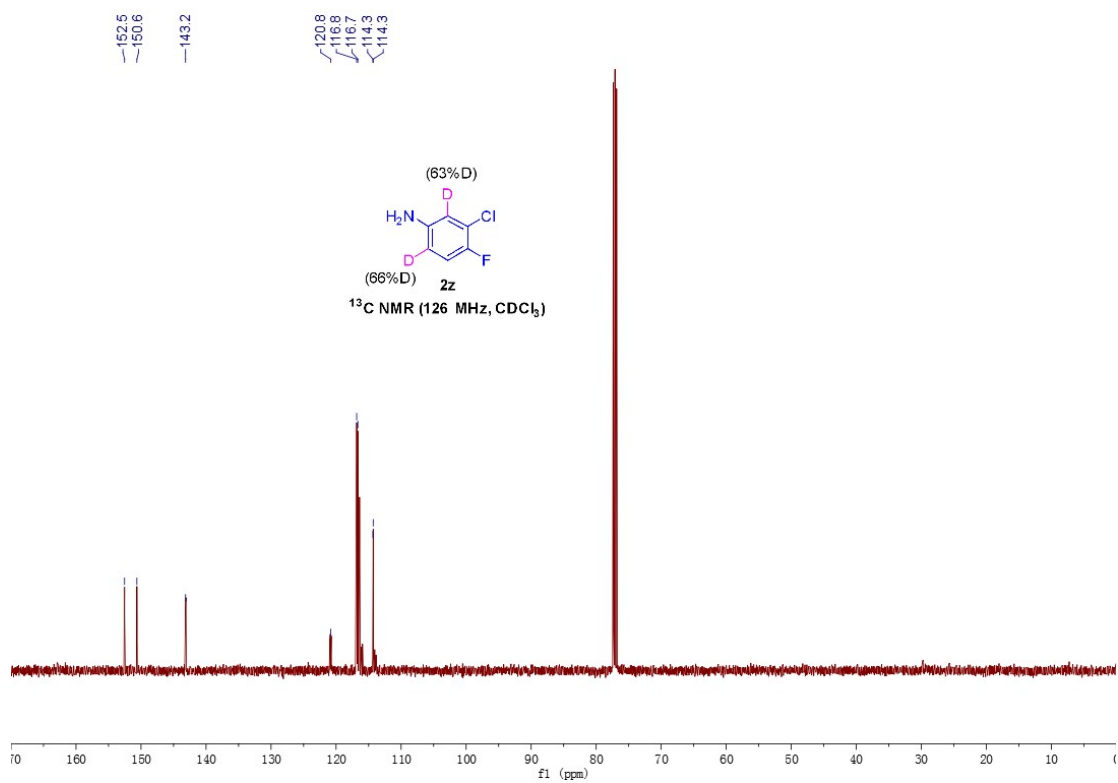

**Figure S52.** <sup>13</sup>C NMR (126 MHz, CDCl<sub>3</sub>) spectrum of **2z**

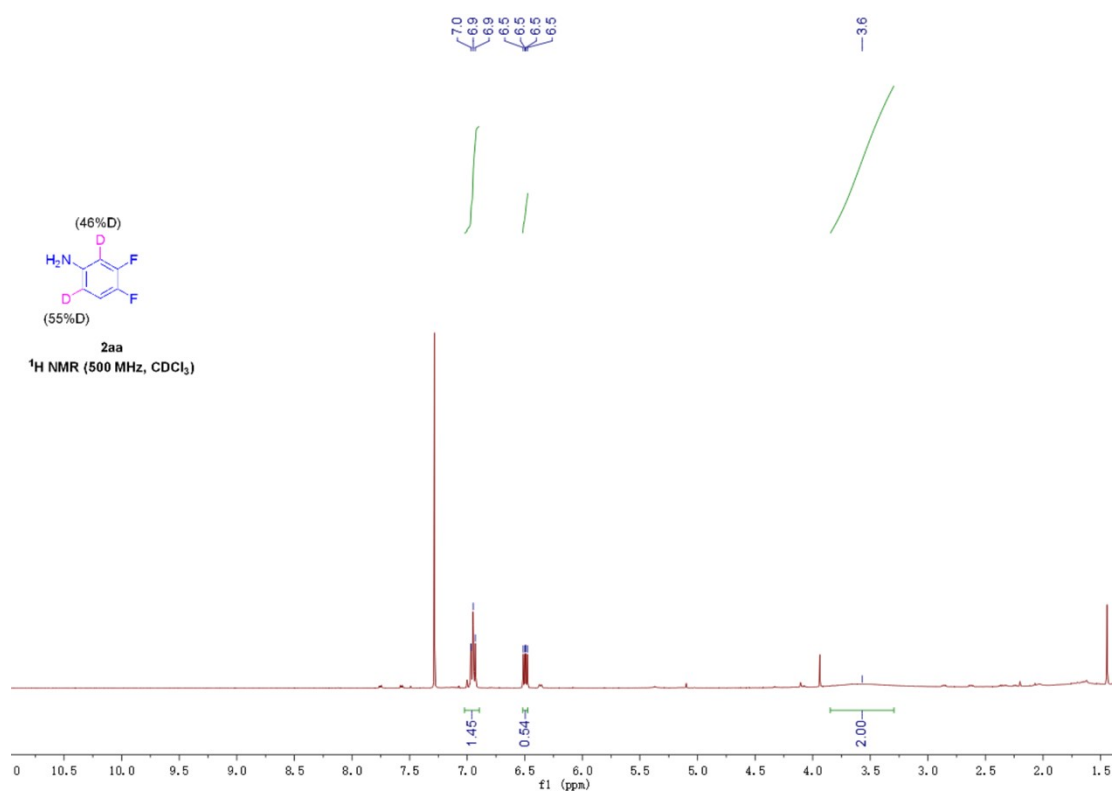

Figure S53.  $^1\text{H}$  NMR (500 MHz,  $\text{CDCl}_3$ ) spectrum of 2aa

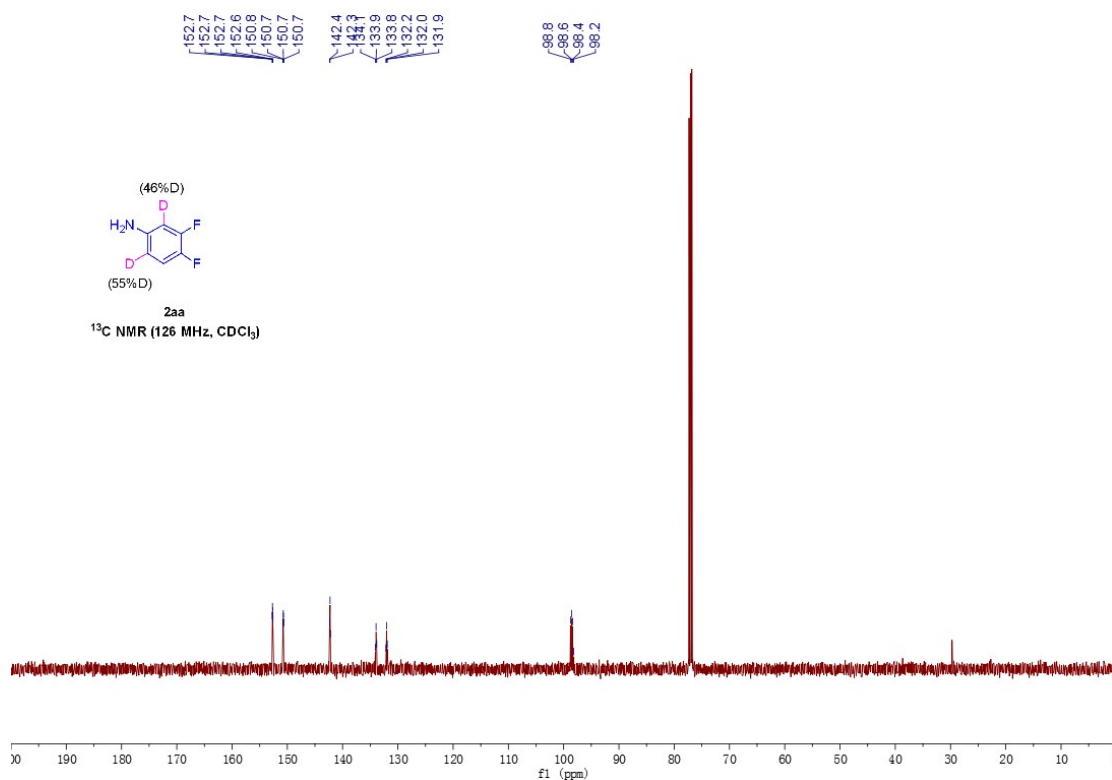

Figure S54.  $^{13}\text{C}$  NMR (126 MHz,  $\text{CDCl}_3$ ) spectrum of 2aa

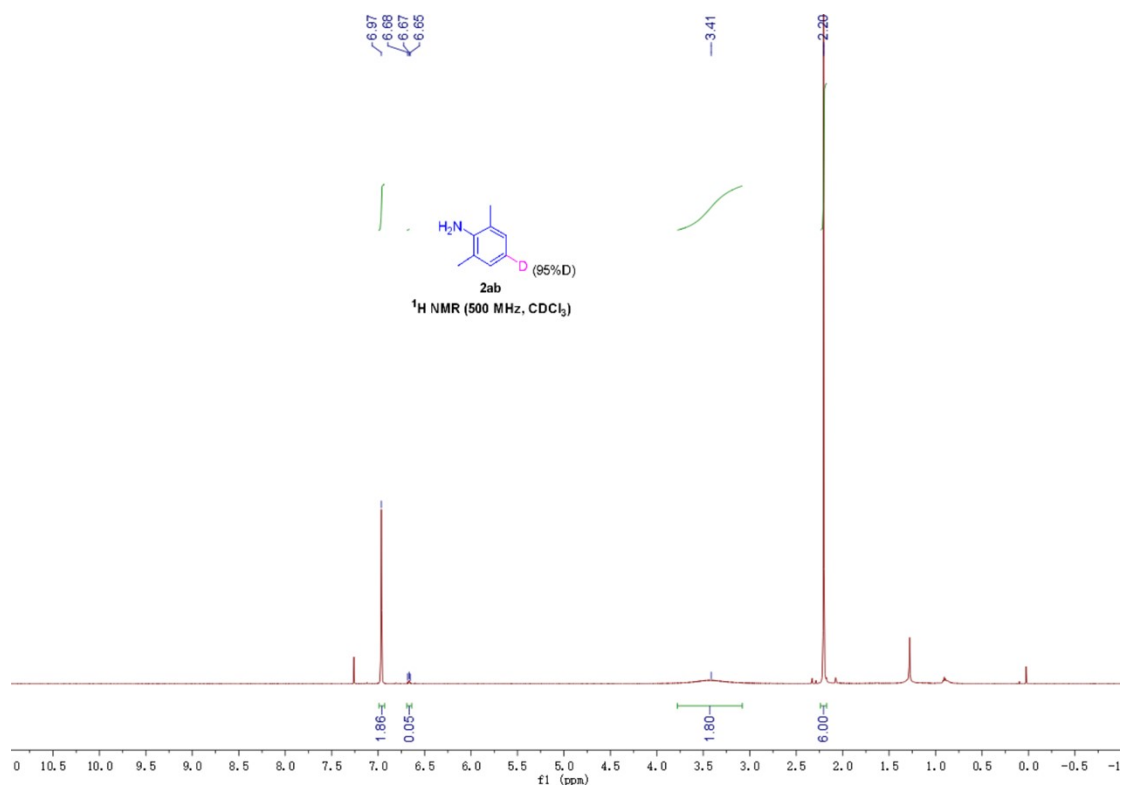

Figure S55. <sup>1</sup>H NMR (500 MHz, CDCl<sub>3</sub>) spectrum of **2ab**

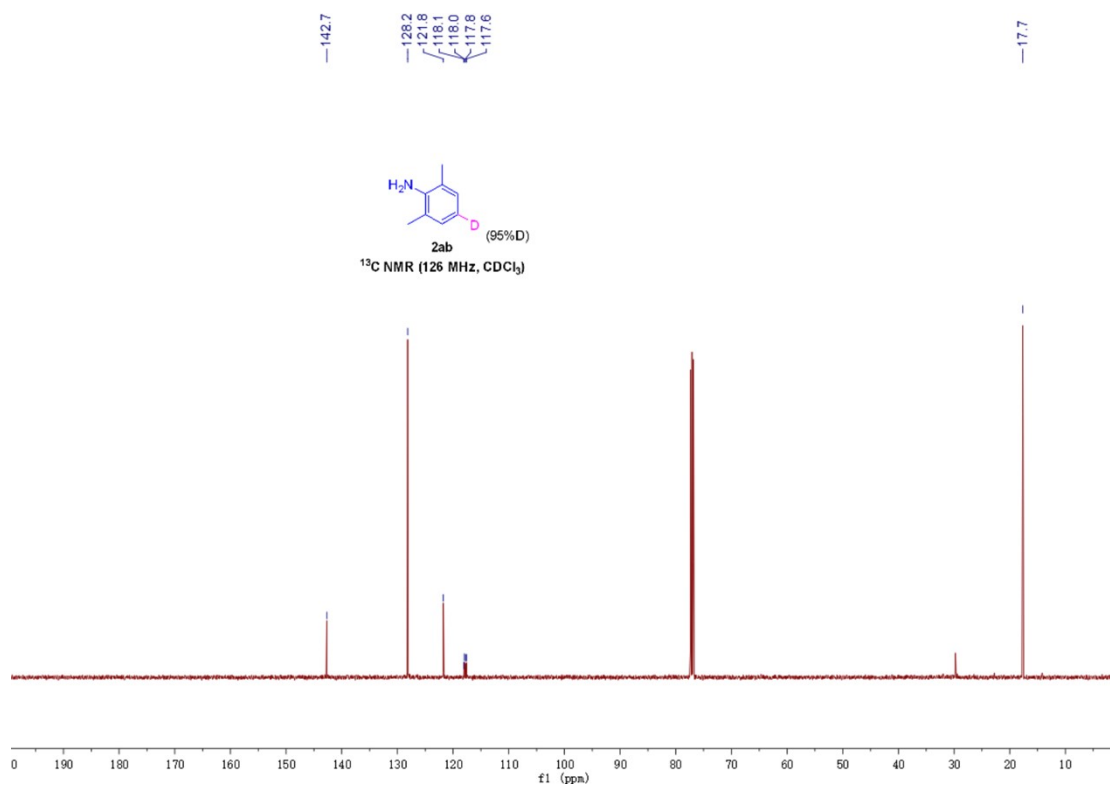

Figure S56. <sup>13</sup>C NMR (126 MHz, CDCl<sub>3</sub>) spectrum of **2ab**

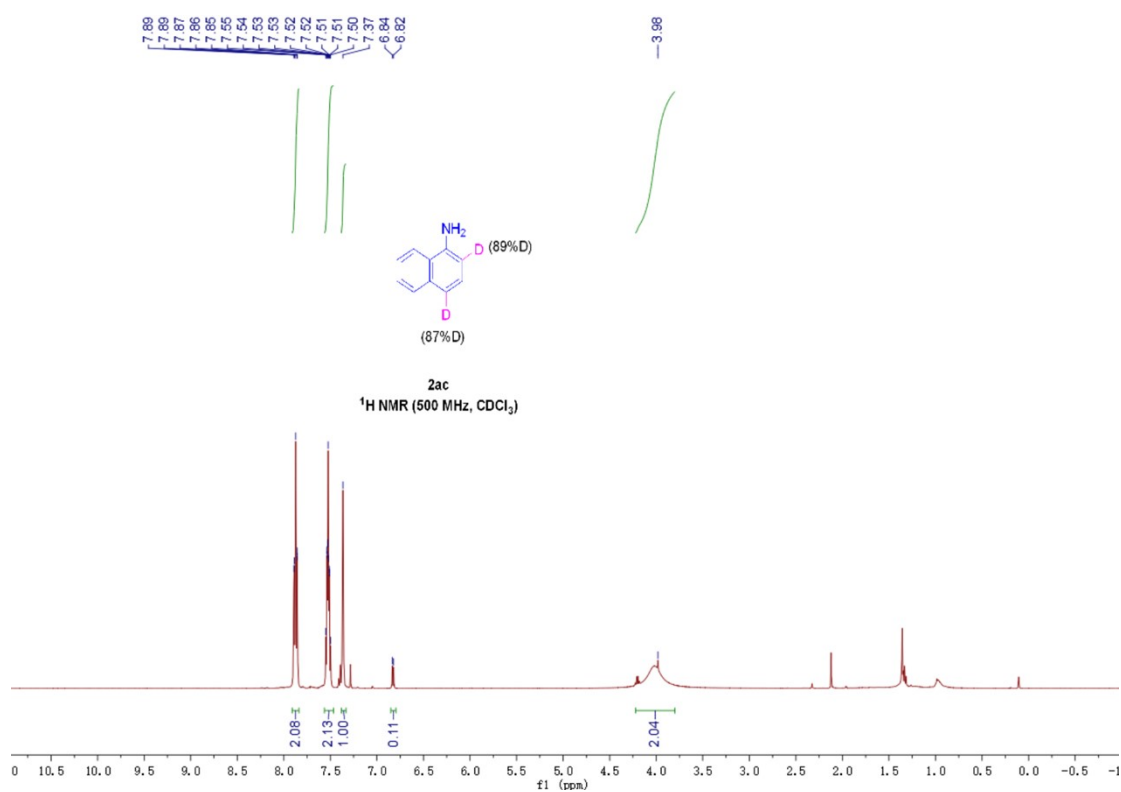

Figure S57. <sup>1</sup>H NMR (500 MHz, CDCl<sub>3</sub>) spectrum of 2ac

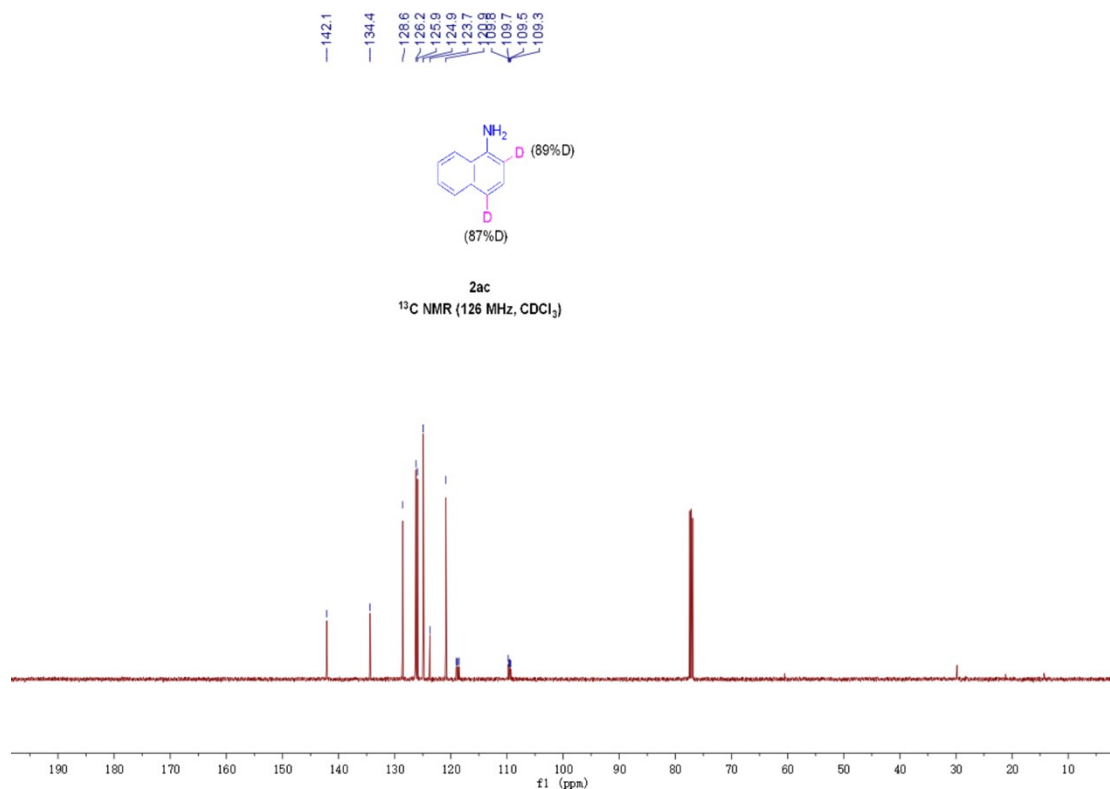

Figure S58. <sup>13</sup>C NMR (126 MHz, CDCl<sub>3</sub>) spectrum of 2ac

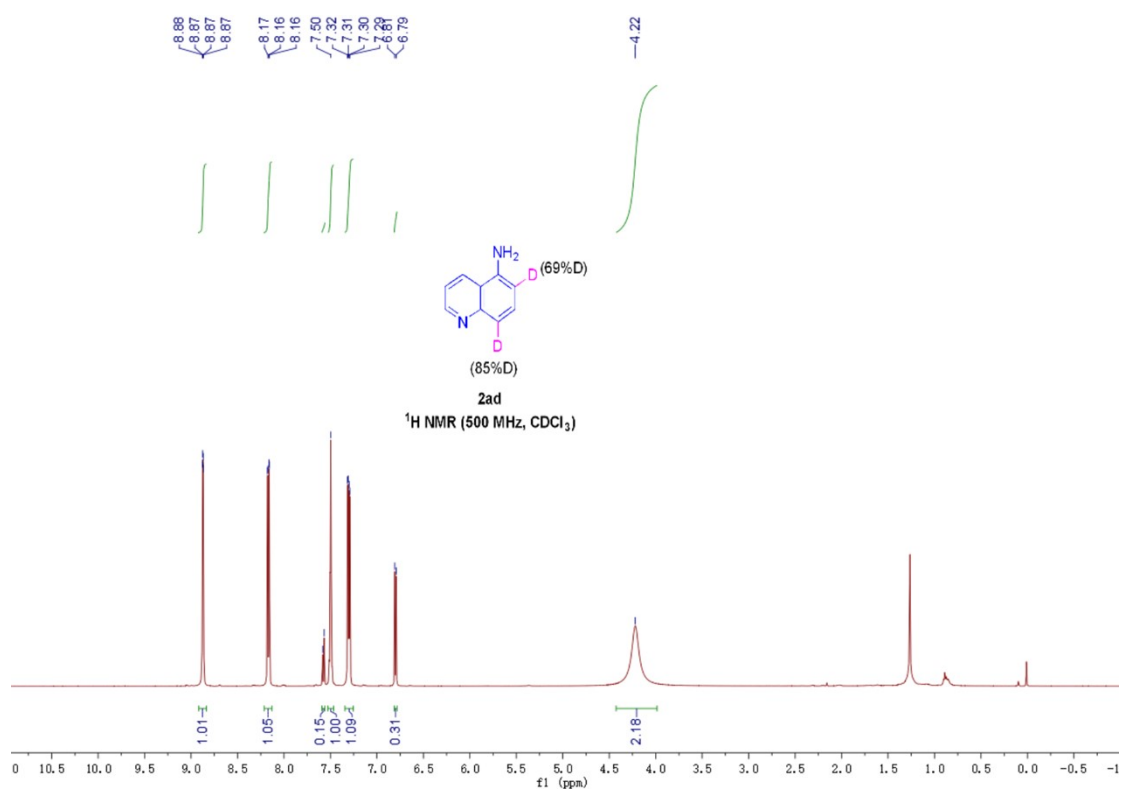

**Figure S59.** <sup>1</sup>H NMR (500 MHz, CDCl<sub>3</sub>) spectrum of **2ad**

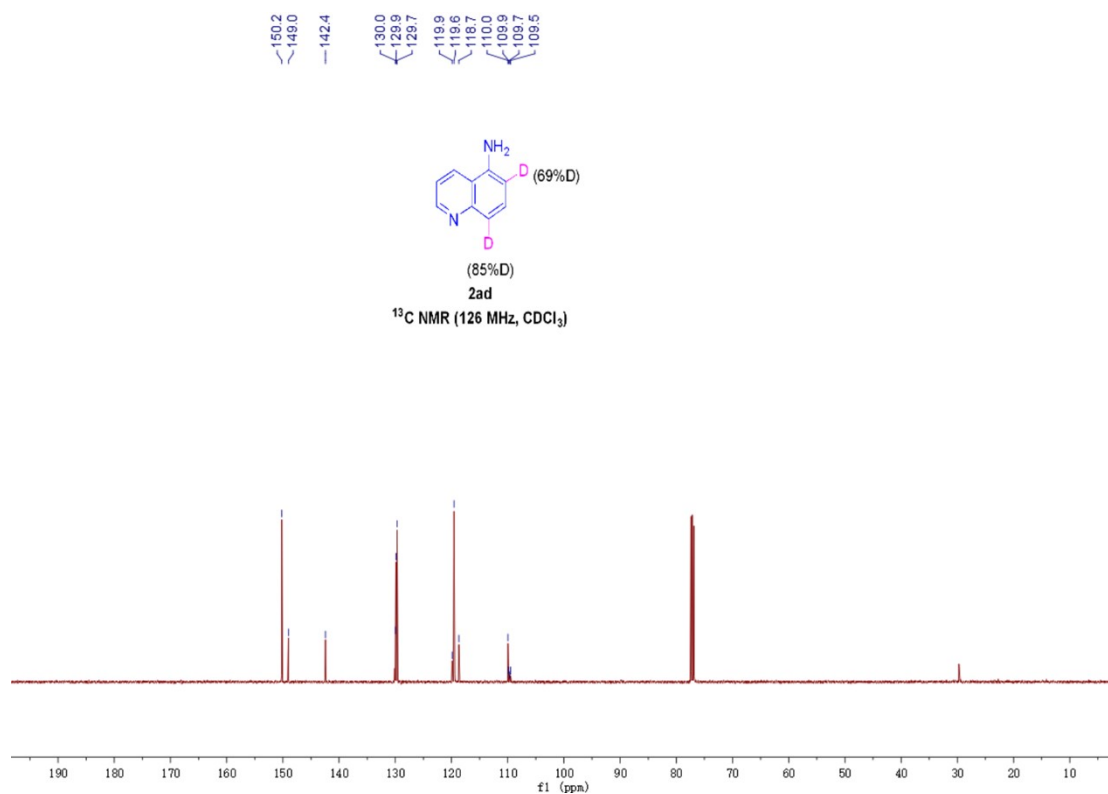

**Figure S60.** <sup>13</sup>C NMR (126 MHz, CDCl<sub>3</sub>) spectrum of **2ad**
